# Supplementary material for: Facile access to chiral anti-1,2-diol derivatives via Ir-catalyzed asymmetric hydrogenation of α-alkoxy-β-ketoesters
Source: Royal Society of Chemistry journal article supplement (doi:10.1039/d4cc05644b), 2024-12-12
Supplement: d4cc05644b1.pdf [file d4cc05644b1.pdf]

## Facile Access to *anti*-1,2-Diol Derivatives via Ir-catalyzed Asymmetric Hydrogenation of $\alpha$ -Alkoxy $\beta$ -Ketoesters

Yuan-Zheng Wang<sup>a,†</sup>, Bin Lu<sup>a,†</sup>, Gen-Qiang Chen<sup>\*.b</sup>, Xumu Zhang<sup>\*.a,c</sup>

<sup>a</sup> Shenzhen Key Laboratory of Small Molecule Drug Discovery and Synthesis, Department of Chemistry and Medi-X Pingshan, Southern University of Science and Technology, Shenzhen 518055, People's Republic of China;

<sup>b</sup> Academy for Advanced Interdisciplinary Studies and Grubbs Institute, Southern University of Science and Technology, Shenzhen 518000, People's Republic of China

<sup>c</sup> Chemistry and Chemical Engineering Guangdong Laboratory, Shantou 515031, People's Republic of China.

<sup>†</sup>Yuan-Zheng Wang and Bin Lu contributed equally to this work.

\*Email: chengq@sustech.edu.cn; zhangxm@sustech.edu.cn

### Contents

|    |                                                                    |     |
|----|--------------------------------------------------------------------|-----|
| 1. | General Remarks .....                                              | S2  |
| 2. | General Procedure for the Preparation of Substrate Compounds ..... | S3  |
| 2. | General Procedure for Asymmetric Hydrogenation .....               | S10 |
| 3. | Synthetic Applications .....                                       | S19 |
| 4. | NMR Spectra .....                                                  | S21 |
| 5. | HPLC chromatograms.....                                            | S63 |
| 6. | References .....                                                   | S82 |

## 1. General Remarks

All reactions and manipulations which are sensitive to moisture or air were performed in an argon-filled glove box or using standard Schlenk techniques. Anhydrous MeOH, *i*PrOH, MeCN, CH<sub>2</sub>Cl<sub>2</sub>, THF and EtOAc purchased from J&K were treated with bubbled argon before used. KO<sup>t</sup>Bu, NaO<sup>t</sup>Bu, KOMe, NaOMe, KOH, NaOH, Cs<sub>2</sub>CO<sub>3</sub>, K<sub>2</sub>CO<sub>3</sub> and Na<sub>2</sub>CO<sub>3</sub> were purchased from Sinopharm Chemical Reagent Co., Ltd. <sup>1</sup>H, <sup>13</sup>C and <sup>19</sup>F NMR spectra were recorded with a Bruker ADVANCE III (400 MHz) spectrometer with CDCl<sub>3</sub> as the solvent. NMR chemical shifts are listed in ppm relative to CHCl<sub>3</sub> (7.26 ppm for <sup>1</sup>H, and 77.0 ppm for <sup>13</sup>C) or H<sub>2</sub>O (4.79 ppm for <sup>1</sup>H). Data are reported as: multiplicity (s = singlet, d = doublet, t = triplet, q = quartet, m = multiplet), coupling constant in hertz (Hz) and signal area integration in natural numbers. <sup>13</sup>C NMR analyses were run with decoupling. HPLC analyses were performed by Agilent 1290 UPLC using Daicel chiral column.

## 2. General Procedure for the Preparation of Substrate Compounds

### Method A:<sup>[1]</sup>

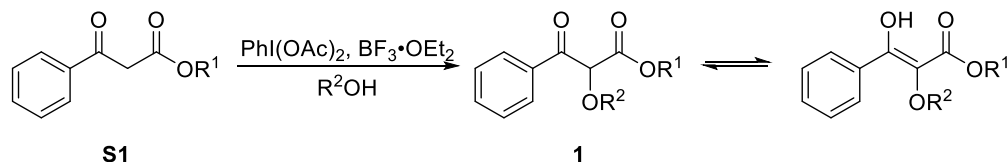

To the solution of iodobenzene diacetate (1.1 equiv) in  $R^2OH$  (0.2 M) was added  $BF_3 \cdot OEt_2$  (1.1 equiv) under a nitrogen atmosphere. After the reaction mixture was stirred for 1 hour, the solution of  $\beta$ -ketoesters **S1** (a mixture of keto and enol forms; 1.0 equiv) in  $R^2OH$  (5 M) was dropwise added. The reaction mixture was stirred for 5 hours, quenched with saturated aqueous  $NaHCO_3$ , and evaporated in vacuo. The resulting mixture was extracted with EtOAc ( $\times 3$ ). The combined organic layers were dried over  $Na_2SO_4$  and evaporated in vacuo. The residue was purified by flash column chromatography to give the corresponding  $\alpha$ -methoxy- $\beta$ -ketoesters **1**.

### Method B:<sup>[2]</sup>

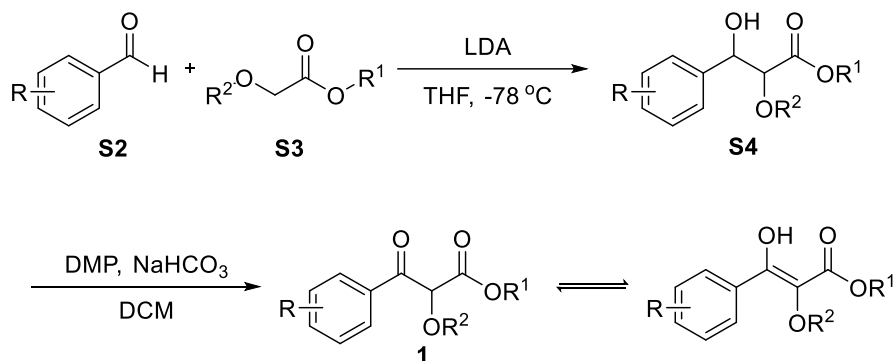

To a solution of **S3** (10 mmol) in anhydrous THF (10 mL) was added a solution of LDA in THF (2.0 M, 12.0 mL, 12 mmol) dropwise under Ar at  $-78^\circ C$ . After 15 min at  $-78^\circ C$ , **S2** (12 mmol, 1.2 equiv) was added dropwise. The reaction mixture was stirred for 5 hours, quenched with 1 M  $NH_4Cl$ , and evaporated in vacuo. The resulting mixture was extracted with EtOAc ( $\times 3$ ). The combined organic layers were dried over  $Na_2SO_4$  and evaporated in vacuo. The residue was purified by flash column chromatography to give the alcohol **S4**.

To a solution of the **S4** (5 mmol) in DCM, Dess-Martin periodinane (8 mmol) and NaHCO<sub>3</sub> (15 mmol) were added successively. The solution was allowed to stir at rt for 3 h. Then water was added, and the obtained suspension was stirred for another 1 h. After the reaction was finished, the reaction mixture was extracted with DCM (3 × 30 mL). The combined organic phase was dried with Na<sub>2</sub>SO<sub>4</sub> and evaporated in vacuum. Purification of the residue by silica gel afforded the desired  $\alpha$ -methoxy- $\beta$ -ketoesters **1**.

### Method C:

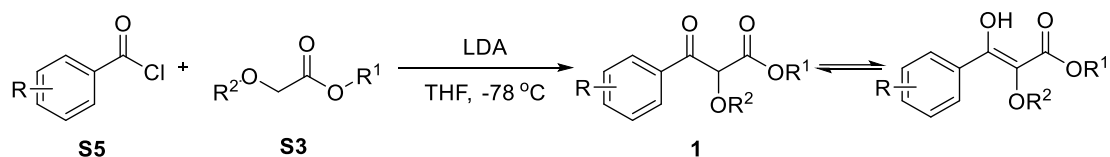

To a solution of **S3** (10 mmol) in anhydrous THF (10 mL) was added a solution of LDA in THF (2.0 M, 12.0 mL, 12 mmol) dropwise under Ar at -78 °C. After 15 min at -78 °C, **S5** (12 mmol, 1.2 equiv) was added dropwise. The reaction mixture was stirred for 5 hours, quenched with 1 M NH<sub>4</sub>Cl, and evaporated in vacuo. The resulting mixture was extracted with EtOAc (× 3). The combined organic layers were dried over Na<sub>2</sub>SO<sub>4</sub> and evaporated in vacuo. The residue was purified by flash column chromatography to give the desired  $\alpha$ -methoxy- $\beta$ -ketoesters **1**.

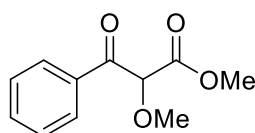

### Methyl 2-methoxy-3-oxo-3-phenylpropanoate (**1a**)

Prepared according to Method A, pale yellow oil, 3.64 g, 87% yield. <sup>1</sup>H NMR (400 MHz, CDCl<sub>3</sub>)  $\delta$  8.07 (dd, *J* = 8.4, 1.3 Hz, 2H), 7.65 – 7.57 (m, 1H), 7.48 (ddd, *J* = 8.6, 6.7, 1.2 Hz, 2H), 4.96 (s, 1H), 3.78 (s, 3H), 3.54 (s, 3H). <sup>13</sup>C NMR (101 MHz, CDCl<sub>3</sub>)  $\delta$  192.4, 167.9, 134.0, 134.0, 129.4, 128.7, 85.0, 58.7, 52.7. HRMS (ESI) *m/z* calcd. for C<sub>11</sub>H<sub>13</sub>O<sub>4</sub> [M+H]<sup>+</sup> : 209.0808, found: 209.0810.

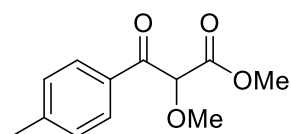

### Methyl 2-methoxy-3-(4-methoxyphenyl)-3-oxopropanoate (**1b**)

Prepared according to Method B, pale yellow oil, 1.45 g, 64% yield over two steps.  $^1\text{H}$  NMR (400 MHz,  $\text{CDCl}_3$ )  $\delta$  8.05 – 7.90 (m, 2H), 7.33 – 7.20 (m, 2H), 4.94 (s, 1H), 3.77 (s, 3H), 3.52 (s, 3H), 2.42 (s, 3H).  $^{13}\text{C}$  NMR (101 MHz,  $\text{CDCl}_3$ )  $\delta$  191.9, 168.0, 145.1, 131.5, 129.5, 129.4, 85.0, 58.6, 52.7, 21.7. HRMS (ESI)  $m/z$  calcd. for  $\text{C}_{12}\text{H}_{15}\text{O}_4$   $[\text{M}+\text{H}]^+$  : 223.0965, found: 223.0965.

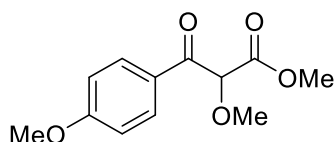

Methyl 2-methoxy-3-oxo-3-(p-tolyl)propanoate (**1c**)

Prepared according to Method B, white solid, 1.68 g, 71% yield over two steps.  $^1\text{H}$  NMR (400 MHz,  $\text{CDCl}_3$ )  $\delta$  8.18 – 7.97 (m, 2H), 7.04 – 6.87 (m, 2H), 4.91 (s, 1H), 3.88 (s, 3H), 3.77 (s, 3H), 3.52 (s, 3H).  $^{13}\text{C}$  NMR (101 MHz,  $\text{CDCl}_3$ )  $\delta$  190.8, 168.2, 164.2, 131.9, 127.0, 113.9, 85.2, 58.5, 55.5, 52.7. HRMS (ESI)  $m/z$  calcd. for  $\text{C}_{12}\text{H}_{15}\text{O}_5$   $[\text{M}+\text{H}]^+$  : 239.0914, found: 239.0914.

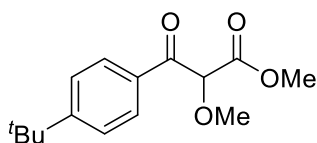

Methyl 3-(4-(tert-butyl)phenyl)-2-methoxy-3-oxopropanoate (**1d**)

Prepared according to Method C, white solid, 1.25 g, 47% yield.  $^1\text{H}$  NMR (400 MHz,  $\text{CDCl}_3$ )  $\delta$  8.07 – 7.96 (m, 2H), 7.56 – 7.41 (m, 2H), 4.95 (s, 1H), 3.78 (s, 3H), 3.53 (s, 3H), 1.34 (s, 9H).  $^{13}\text{C}$  NMR (101 MHz,  $\text{CDCl}_3$ )  $\delta$  191.9, 168.1, 158.0, 131.4, 129.4, 125.7, 85.1, 58.6, 52.7, 35.2, 31.0. HRMS (ESI)  $m/z$  calcd. for  $\text{C}_{15}\text{H}_{21}\text{O}_4$   $[\text{M}+\text{H}]^+$  : 265.1434, found: 265.1434.

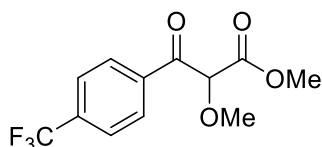

Methyl 3-(4-fluorophenyl)-2-methoxy-3-oxopropanoate (**1e**)

Prepared according to Method B, pale yellow oil, 2.07 g, 75% yield over two steps.  $^1\text{H}$  NMR (400 MHz,  $\text{CDCl}_3$ )  $\delta$  8.19 (dt,  $J = 8.1, 0.8$  Hz, 2H), 7.78 – 7.71 (m, 2H), 4.92 (s, 1H), 3.79 (s, 3H), 3.55 (s, 3H).  $^{13}\text{C}$  NMR (101 MHz,  $\text{CDCl}_3$ )  $\delta$  191.6, 167.6, 136.5,

135.1 (q,  $J = 32.8$  Hz), 129.8, 125.7 (q,  $J = 3.7$  Hz), 123.4 (q,  $J = 272.7$  Hz), 85.3, 58.9, 52.9.  $^{19}\text{F}$  NMR (376 MHz,  $\text{CDCl}_3$ )  $\delta$  -63.35. HRMS (ESI)  $m/z$  calcd. for  $\text{C}_{12}\text{H}_{12}\text{F}_3\text{O}_4$   $[\text{M}+\text{H}]^+$ : 277.0682, found: 277.0683.

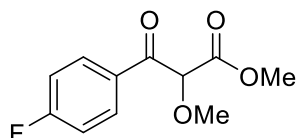

Methyl 3-(4-fluorophenyl)-2-methoxy-3-oxopropanoate (**1f**)

Prepared according to Method B, pale yellow oil, 1.77 g, 78% yield over two steps.  $^1\text{H}$  NMR (400 MHz,  $\text{CDCl}_3$ )  $\delta$  8.22 – 8.07 (m, 2H), 7.21 – 7.07 (m, 2H), 4.89 (s, 1H), 3.78 (s, 3H), 3.53 (s, 3H).  $^{13}\text{C}$  NMR (101 MHz,  $\text{CDCl}_3$ )  $\delta$  190.8, 167.9, 166.2 (d,  $J = 256.9$  Hz), 132.3 (d,  $J = 9.5$  Hz), 130.3 (d,  $J = 3.0$  Hz), 115.9 (d,  $J = 22.0$  Hz), 85.4, 58.7, 52.8.  $^{19}\text{F}$  NMR (376 MHz,  $\text{CDCl}_3$ )  $\delta$  -102.93. HRMS (ESI)  $m/z$  calcd. for  $\text{C}_{11}\text{H}_{12}\text{FO}_4$   $[\text{M}+\text{H}]^+$ : 277.0714, found: 227.0715.

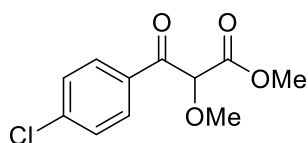

Methyl 3-(4-chlorophenyl)-2-methoxy-3-oxopropanoate (**1g**)

Prepared according to Method B, pale yellow oil, 1.48 g, 61% yield over two steps.  $^1\text{H}$  NMR (400 MHz,  $\text{CDCl}_3$ )  $\delta$  8.03 (d,  $J = 8.6$  Hz, 2H), 7.45 (d,  $J = 8.6$  Hz, 2H), 4.88 (s, 1H), 3.78 (s, 3H), 3.53 (s, 3H).  $^{13}\text{C}$  NMR (101 MHz,  $\text{CDCl}_3$ )  $\delta$  191.3, 167.8, 140.7, 132.2, 130.9, 129.0, 85.3, 58.7, 52.8. HRMS (ESI)  $m/z$  calcd. for  $\text{C}_{11}\text{H}_{12}\text{ClO}_4$   $[\text{M}+\text{H}]^+$ : 243.0419, found: 243.0420.

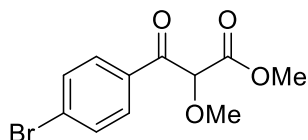

Methyl 3-(4-bromophenyl)-2-methoxy-3-oxopropanoate (**1h**)

Prepared according to Method B, pale yellow oil, 1.60 g, 56% yield over two steps.  $^1\text{H}$  NMR (400 MHz,  $\text{CDCl}_3$ )  $\delta$  8.01 – 7.89 (m, 2H), 7.72 – 7.54 (m, 2H), 4.88 (s, 1H), 3.78 (s, 3H), 3.53 (s, 3H).  $^{13}\text{C}$  NMR (101 MHz,  $\text{CDCl}_3$ )  $\delta$  191.5, 167.7, 132.6, 132.0, 130.9, 129.5, 85.3, 58.8, 52.9. HRMS (ESI)  $m/z$  calcd. for  $\text{C}_{11}\text{H}_{12}\text{CBrO}_4$   $[\text{M}+\text{H}]^+$ : 286.9913, found: 286.9915.

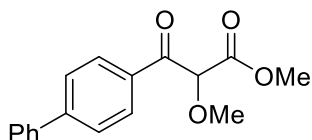

Methyl 3-(4-(benzyloxy)phenyl)-2-methoxy-3-oxopropanoate (**1i**)

Prepared according to Method C, pale yellow oil, 1.99 g, 70% yield.  $^1\text{H}$  NMR (600 MHz,  $\text{CDCl}_3$ )  $\delta$  8.19 – 8.13 (m, 2H), 7.73 – 7.67 (m, 2H), 7.65 – 7.60 (m, 2H), 7.52 – 7.44 (m, 2H), 7.44 – 7.38 (m, 1H), 4.98 (s, 1H), 3.80 (s, 3H), 3.56 (s, 3H).  $^{13}\text{C}$  NMR (151 MHz,  $\text{CDCl}_3$ )  $\delta$  192.0, 168.0, 146.7, 139.6, 132.6, 130.0, 129.0, 128.4, 127.3, 127.3, 85.2, 58.7, 52.8. HRMS (ESI)  $m/z$  calcd. for  $\text{C}_{17}\text{H}_{17}\text{O}_4$   $[\text{M}+\text{H}]^+$ : 285.1121, found: 285.1122.

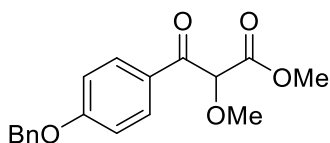

Methyl 3-([1,1'-biphenyl]-4-yl)-2-methoxy-3-oxopropanoate (**1j**)

Prepared according to Method B, pale yellow oil, 2.55 g, 81% yield over two steps.  $^1\text{H}$  NMR (400 MHz,  $\text{CDCl}_3$ )  $\delta$  8.07 (d,  $J = 8.9$  Hz, 2H), 7.48 – 7.30 (m, 5H), 7.01 (d,  $J = 8.9$  Hz, 2H), 5.13 (s, 2H), 4.90 (s, 1H), 3.76 (s, 3H), 3.51 (s, 3H).  $^{13}\text{C}$  NMR (101 MHz,  $\text{CDCl}_3$ )  $\delta$  190.8, 168.2, 163.4, 136.00, 131.9, 128.7, 128.3, 127.5, 127.1, 114.7, 85.2, 70.2, 58.5, 52.7. HRMS (ESI)  $m/z$  calcd. for  $\text{C}_{18}\text{H}_{19}\text{O}_5$   $[\text{M}+\text{H}]^+$ : 315.1127, found: 315.1122.

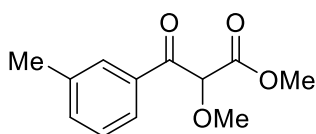

Methyl 2-methoxy-3-oxo-3-(m-tolyl)propanoate (**1k**)

Prepared according to Method B, pale yellow oil, 1.12 g, 50% yield over two steps.  $^1\text{H}$  NMR (600 MHz,  $\text{CDCl}_3$ )  $\delta$  7.87 (d,  $J = 7.8$  Hz, 2H), 7.42 (d,  $J = 7.6$  Hz, 1H), 7.39 – 7.33 (m, 1H), 4.97 (s, 1H), 3.77 (s, 3H), 3.53 (s, 3H), 2.41 (s, 3H).  $^{13}\text{C}$  NMR (151 MHz,  $\text{CDCl}_3$ )  $\delta$  192.5, 168.0, 138.6, 134.9, 134.0, 129.7, 128.5, 126.6, 84.9, 58.6, 52.7, 21.3. HRMS (ESI)  $m/z$  calcd. for  $\text{C}_{12}\text{H}_{15}\text{O}_4$   $[\text{M}+\text{H}]^+$ : 223.0965, found: 223.0965.

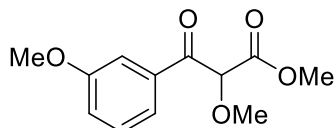

Methyl 2-methoxy-3-(3-methoxyphenyl)-3-oxopropanoate (**1l**)

Prepared according to Method B, pale yellow oil, 1.48 g, 62% yield over two steps.  $^1\text{H}$  NMR (600 MHz,  $\text{CDCl}_3$ )  $\delta$  7.67 (ddd,  $J = 7.7, 1.6, 0.9$  Hz, 1H), 7.58 (dd,  $J = 2.7, 1.6$  Hz, 1H), 7.38 (t,  $J = 8.0$  Hz, 1H), 7.15 (ddd,  $J = 8.3, 2.7, 0.9$  Hz, 1H), 4.95 (s, 1H), 3.86 (s, 3H), 3.78 (s, 3H), 3.54 (s, 3H).  $^{13}\text{C}$  NMR (151 MHz,  $\text{CDCl}_3$ )  $\delta$  192.1, 167.9, 159.8, 135.2, 129.7, 122.1, 120.9, 113.1, 84.9, 58.7, 55.4, 52.8. HRMS (ESI)  $m/z$  calcd. for  $\text{C}_{12}\text{H}_{15}\text{O}_5$   $[\text{M}+\text{H}]^+$ : 239.0914, found: 239.0914.

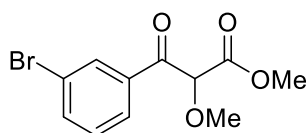

Methyl 3-(3-bromophenyl)-2-methoxy-3-oxopropanoate (**1m**)

Prepared according to Method B, pale yellow oil, 2.20 g, 77% yield over two steps.  $^1\text{H}$  NMR (600 MHz,  $\text{CDCl}_3$ )  $\delta$  8.17 (t,  $J = 1.8$  Hz, 1H), 8.00 (dt,  $J = 7.9, 1.3$  Hz, 1H), 7.71 (ddd,  $J = 8.0, 2.0, 1.0$  Hz, 1H), 7.34 (t,  $J = 7.9$  Hz, 1H), 4.89 (s, 1H), 3.78 (s, 3H), 3.53 (s, 3H).  $^{13}\text{C}$  NMR (151 MHz,  $\text{CDCl}_3$ )  $\delta$  191.23, 167.64, 136.92, 135.65, 132.27, 130.27, 128.08, 123.00, 85.07, 58.85, 52.92. HRMS (ESI)  $m/z$  calcd. for  $\text{C}_{11}\text{H}_{11}\text{BrO}_4$   $[\text{M}+\text{H}]^+$ : 286.9913, found: 286.9914.

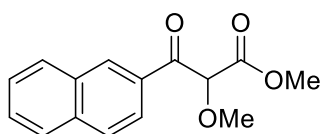

Methyl 2-methoxy-3-(naphthalen-2-yl)-3-oxopropanoate (**1n**)

Prepared according to Method C, pale yellow oil, 1.60 g, 62% yield.  $^1\text{H}$  NMR (600 MHz,  $\text{CDCl}_3$ )  $\delta$  8.69 – 8.66 (m, 1H), 8.07 (dd,  $J = 8.6, 1.8$  Hz, 1H), 8.00 (dd,  $J = 8.5, 1.3$  Hz, 1H), 7.93 – 7.83 (m, 2H), 7.62 (ddd,  $J = 8.2, 6.9, 1.3$  Hz, 1H), 7.56 (ddd,  $J = 8.2, 6.9, 1.2$  Hz, 1H), 5.07 (s, 1H), 3.78 (s, 3H), 3.58 (s, 3H).  $^{13}\text{C}$  NMR (151 MHz,  $\text{CDCl}_3$ )  $\delta$  192.4, 168.0, 136.0, 132.4, 131.9, 131.3, 130.0, 129.1, 128.6, 127.8, 126.9, 124.3, 85.2, 58.7, 52.8. HRMS (ESI)  $m/z$  calcd. for  $\text{C}_{15}\text{H}_{15}\text{O}_4$   $[\text{M}+\text{H}]^+$ : 259.0965, found: 259.0965.



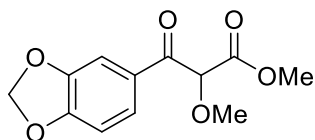

Methyl 3-(benzo[d][1,3]dioxol-5-yl)-2-methoxy-3-oxopropanoate (**1o**)

Prepared according to Method B, pale yellow oil, 1.14 g, 45% yield over two steps.  $^1\text{H}$  NMR (400 MHz,  $\text{CDCl}_3$ )  $\delta$  7.75 (dd,  $J = 8.2, 1.8$  Hz, 1H), 7.53 (d,  $J = 1.8$  Hz, 1H), 6.86 (d,  $J = 8.2$  Hz, 1H), 6.06 (s, 2H), 4.88 (s, 1H), 3.78 (s, 3H), 3.52 (s, 3H).  $^{13}\text{C}$  NMR (101 MHz,  $\text{CDCl}_3$ )  $\delta$  190.4, 168.1, 152.6, 148.2, 128.6, 126.4, 108.9, 108.1, 102.0, 85.2, 58.6, 52.7. HRMS (ESI)  $m/z$  calcd. for  $\text{C}_{15}\text{H}_{15}\text{O}_4$   $[\text{M}+\text{H}]^+$ : 253.0707, found: 253.0707.

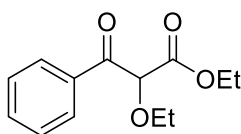

Ethyl 2-ethoxy-3-oxo-3-phenylpropanoate (**1p**)

Prepared according to Method A, pale yellow oil, 2.06 g, 87% yield.  $^1\text{H}$  NMR (400 MHz,  $\text{CDCl}_3$ )  $\delta$  8.08 (dd,  $J = 8.4, 1.4$  Hz, 2H), 7.70 – 7.54 (m, 1H), 7.47 (dd,  $J = 8.4, 7.1$  Hz, 2H), 5.01 (s, 1H), 4.23 (q,  $J = 7.1$  Hz, 2H), 3.83 – 3.71 (m, 1H), 3.71 – 3.59 (m, 1H), 1.27 (t,  $J = 7.0$  Hz, 3H), 1.19 (t,  $J = 7.1$  Hz, 3H).  $^{13}\text{C}$  NMR (101 MHz,  $\text{CDCl}_3$ )  $\delta$  192.8, 167.8, 134.2, 133.8, 129.4, 128.6, 83.7, 66.9, 61.8, 15.1, 13.9. HRMS (ESI)  $m/z$  calcd. for  $\text{C}_{15}\text{H}_{15}\text{O}_4$   $[\text{M}+\text{H}]^+$ : 237.1121, found: 237.1122.

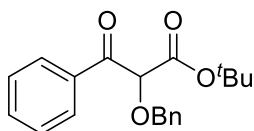

Tert-butyl 2-(benzyloxy)-3-oxo-3-phenylpropanoate (**1q**)

Prepared according to Method B, white solid, 2.54 g, 73% yield over two steps.  $^1\text{H}$  NMR (400 MHz,  $\text{CDCl}_3$ )  $\delta$  8.02 (d,  $J = 7.2$  Hz, 2H), 7.60 – 7.53 (m, 1H), 7.44 (dd,  $J = 8.4, 7.2$  Hz, 2H), 7.38 – 7.28 (m, 5H), 4.94 (s, 1H), 4.72 (q,  $J = 11.7$  Hz, 2H), 1.37 (s, 9H).  $^{13}\text{C}$  NMR (151 MHz,  $\text{CDCl}_3$ )  $\delta$  192.9, 166.6, 136.4, 134.4, 133.6, 129.3, 128.5, 128.5, 128.3, 128.2, 83.2, 82.5, 72.6, 27.8. HRMS (ESI)  $m/z$  calcd. for  $\text{C}_{20}\text{H}_{22}\text{NaO}_4$   $[\text{M}+\text{Na}]^+$ : 349.1410, found: 349.1410.

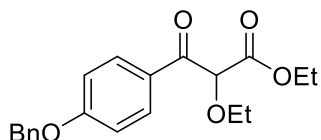

Ethyl 3-(4-(benzyloxy)phenyl)-2-ethoxy-3-oxopropanoate (**1r**)

Prepared according to Method B, pale yellow oil, 2.26 g, 66% yield over two steps.  $^1\text{H}$  NMR (400 MHz,  $\text{CDCl}_3$ )  $\delta$  8.15 – 8.04 (m, 2H), 7.52 – 7.27 (m, 5H), 7.01 (d,  $J$  = 9.0 Hz, 2H), 5.13 (s, 2H), 4.95 (s, 1H), 4.22 (qd,  $J$  = 7.1, 1.0 Hz, 2H), 3.78 – 3.67 (m, 1H), 3.67 – 3.52 (m, 1H), 1.27 (t,  $J$  = 7.0 Hz, 3H), 1.20 (t,  $J$  = 7.1 Hz, 3H).  $^{13}\text{C}$  NMR (151 MHz,  $\text{CDCl}_3$ )  $\delta$  191.3, 168.0, 163.2, 136.0, 131.9, 128.7, 128.3, 127.5, 127.3, 114.6, 83.9, 70.2, 66.7, 61.8, 15.1, 14.0. HRMS (ESI)  $m/z$  calcd. for  $\text{C}_{20}\text{H}_{23}\text{O}_5$   $[\text{M}+\text{H}]^+$ : 343.1540, found: 343.1542.

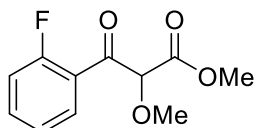

Methyl 3-(2-fluorophenyl)-2-methoxy-3-oxopropanoate (**1s**)

Prepared according to Method B, pale yellow oil, 1.44 g, 63% yield over two steps.  $^1\text{H}$  NMR (400 MHz,  $\text{CDCl}_3$ )  $\delta$  7.79 (td,  $J$  = 7.5, 1.9 Hz, 1H), 7.50 (dddd,  $J$  = 8.3, 7.2, 5.2, 1.9 Hz, 1H), 7.19 (td,  $J$  = 7.6, 1.1 Hz, 1H), 7.12 – 7.04 (m, 1H), 4.96 (s, 1H), 3.74 (s, 3H), 3.48 (s, 3H).  $^{13}\text{C}$  NMR (101 MHz,  $\text{CDCl}_3$ )  $\delta$  190.39 (d,  $J$  = 3.7 Hz), 166.54, 160.64 (d,  $J$  = 255.1 Hz), 134.39 (d,  $J$  = 9.3 Hz), 130.24 (d,  $J$  = 2.5 Hz), 123.69 (d,  $J$  = 3.4 Hz), 122.48 (d,  $J$  = 13.0 Hz), 115.49 (d,  $J$  = 23.4 Hz), 84.86 (d,  $J$  = 5.8 Hz), 58.44, 51.65.  $^{19}\text{F}$  NMR (377 MHz,  $\text{CDCl}_3$ )  $\delta$  -110.12. HRMS (ESI)  $m/z$  calcd. for  $\text{C}_{11}\text{H}_{12}\text{FO}_4$   $[\text{M}+\text{H}]^+$ : 227.0714, found: 227.0715.

## 2. General Procedure for Asymmetric Hydrogenation

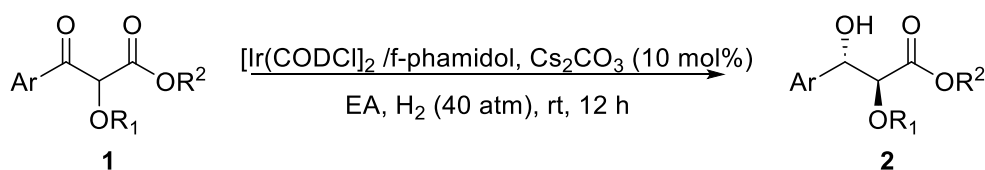

To a 4.0 mL vial equipped with  $\alpha$ -methoxy- $\beta$ -ketoester **1** (0.2 mmol, 1.0 eq.) was added the Ir/f-phamidol-precatalyst (1.5 mg,  $2.0 \times 10^{-3}$  mmol, 0.01 eq.), Cs<sub>2</sub>CO<sub>3</sub> (6.6 mg, 0.02 mmol, 10 mol%) and anhydrous EtOAc (1.0 mL) in an argon-filled glovebox. The autoclave was quickly purged with hydrogen gas for three times, and then pressurized to 40 bar H<sub>2</sub>. The reaction solution was stirred at room temperature for 12 h, and then the pressure was released carefully. After slowly releasing the hydrogen pressure, the reaction mixture was passed through a short column of silica gel to get the pure product. The yield was determined by NMR analysis after the volatiles were removed under vacuum. The ee and dr values were determined by HPLC analysis on a chiral stationary phase.

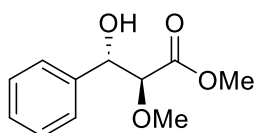

Methyl (2*S*,3*S*)-3-hydroxy-2-methoxy-3-phenylpropanoate (**2a**)

Colorless liquid, 46.1 mg, 99% yield, 99% ee, 97:3 dr;  $[\alpha]_D^{20} = 2.2$  ( $c = 1.0$ , CHCl<sub>3</sub>); HPLC (Chiralpak IC column, hexane/isopropanol = 95/5; flow rate = 0.7 mL/min; UV detection at 210 nm;  $t_R = 16.0$  min (*anti*),  $t_R = 18.6$  min (*anti*). <sup>1</sup>H NMR (400 MHz, CDCl<sub>3</sub>)  $\delta$  7.40 – 7.27 (m, 5H), 5.02 – 4.94 (m, 1H), 3.99 (d,  $J = 5.8$  Hz, 1H), 3.67 (s, 3H), 3.37 (s, 3H), 2.98 (d,  $J = 4.9$  Hz, 1H). <sup>13</sup>C NMR (101 MHz, CDCl<sub>3</sub>)  $\delta$  169.8, 138.3, 127.2, 127.1, 125.5, 83.4, 73.0, 57.9, 50.9. HRMS (ESI)  $m/z$  calcd. for C<sub>11</sub>H<sub>14</sub>NaO<sub>4</sub> [M+Na]<sup>+</sup>: 233.0784, found: 233.0784.

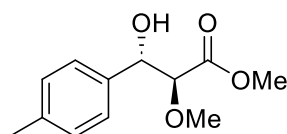

Methyl (2*S*,3*S*)-3-hydroxy-2-methoxy-3-(*p*-tolyl)propanoate (**2b**)

Colorless liquid, 49.2 mg, 99% yield, 98% ee, 95:5 dr;  $[\alpha]_D^{20} = 3.5$  ( $c = 1.0$ , CHCl<sub>3</sub>); HPLC (Chiralpak IC column, hexane/isopropanol = 90/10; flow rate = 1.0 mL/min; UV detection at 230 nm;  $t_R = 13.2$  min (*anti*),  $t_R = 16.9$  min (*anti*),  $t_R = 23.0$  min (*syn*),  $t_R = 28.3$  min (*syn*). <sup>1</sup>H NMR (400 MHz, CDCl<sub>3</sub>)  $\delta$  7.17 (d,  $J = 8.0$  Hz, 2H), 7.08 (d,  $J = 7.9$  Hz, 2H), 4.87 (t,  $J = 5.3$  Hz, 1H), 3.91 (d,  $J = 5.8$  Hz, 1H), 3.62 (s, 3H), 3.30 (s, 3H), 2.78

(d,  $J = 5.1$  Hz, 1H), 2.26 (s, 3H).  $^{13}\text{C}$  NMR (101 MHz,  $\text{CDCl}_3$ )  $\delta$  170.9, 137.8, 136.4, 129.0, 126.4, 84.5, 73.9, 58.9, 51.9, 21.1. HRMS (ESI)  $m/z$  calcd. for  $\text{C}_{12}\text{H}_{16}\text{NaO}_4$   $[\text{M}+\text{Na}]^+$ : 247.0941, found: 247.0941.

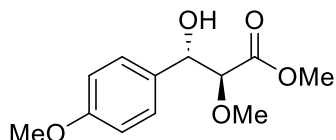

Methyl (2*S*,3*S*)-3-hydroxy-2-methoxy-3-(4-methoxyphenyl)propanoate (**2c**)

Colorless liquid, 56.4 mg, 99% yield, 98% ee, 99:1 dr;  $[\alpha]_{\text{D}}^{20} = 1.7$  ( $c = 1.0$ ,  $\text{CHCl}_3$ ); HPLC (Chiralpak IC column, hexane/isopropanol = 85/15; flow rate = 1.0 mL/min; UV detection at 230 nm;  $t_{\text{R}}=13.4$  min (*anti*),  $t_{\text{R}}=17.2$  min (*anti*),  $t_{\text{R}}=21.1$  min (*syn*).  $^1\text{H}$  NMR (400 MHz,  $\text{CDCl}_3$ )  $\delta$  7.21 (dd,  $J = 8.8, 2.1$  Hz, 2H), 6.90 – 6.71 (m, 2H), 4.85 (t,  $J = 5.4$  Hz, 1H), 3.90 (d,  $J = 5.9$  Hz, 1H), 3.73 (s, 3H), 3.62 (s, 3H), 3.30 (s, 3H), 2.79 (d,  $J = 5.1$  Hz, 1H).  $^{13}\text{C}$  NMR (101 MHz,  $\text{CDCl}_3$ )  $\delta$  171.0, 159.4, 131.6, 127.8, 113.7, 113.7, 84.5, 73.7, 58.9, 55.2, 51.9. HRMS (ESI)  $m/z$  calcd. for  $\text{C}_{12}\text{H}_{16}\text{NaO}_5$   $[\text{M}+\text{Na}]^+$ : 263.0890, found: 263.0890.

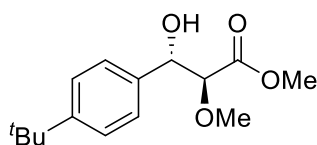

Methyl (2*S*,3*S*)-3-(4-(tert-butyl)phenyl)-3-hydroxy-2-methoxypropanoate (**2d**)

Colorless liquid, 56.7 mg, 99% yield, 93% ee, 96:4 dr;  $[\alpha]_{\text{D}}^{20} = 1.5$  ( $c = 1.0$ ,  $\text{CHCl}_3$ ); HPLC (Chiralpak IB column, hexane/isopropanol = 90/10; flow rate = 1.0 mL/min; UV detection at 210 nm;  $t_{\text{R}}=6.1$  min (*anti*),  $t_{\text{R}}=6.6$  min (*anti*),  $t_{\text{R}}=6.9$  min (*syn*),  $t_{\text{R}}=7.4$  min (*syn*).  $^1\text{H}$  NMR (400 MHz,  $\text{CDCl}_3$ )  $\delta$  7.36 (d,  $J = 8.5$  Hz, 2H), 7.31 – 7.23 (m, 2H), 4.95 (t,  $J = 5.3$  Hz, 1H), 4.00 (d,  $J = 5.9$  Hz, 1H), 3.69 (s, 3H), 3.38 (s, 3H), 2.84 (d,  $J = 5.2$  Hz, 1H), 1.31 (s, 10H).  $^{13}\text{C}$  NMR (101 MHz,  $\text{CDCl}_3$ )  $\delta$  171.0, 151.0, 136.4, 126.3, 125.2, 125.1, 84.5, 84.5, 73.9, 73.8, 58.9, 51.9, 34.5, 31.3. HRMS (ESI)  $m/z$  calcd. for  $\text{C}_{15}\text{H}_{22}\text{NaO}_4$   $[\text{M}+\text{Na}]^+$ : 289.1410, found: 289.1410.

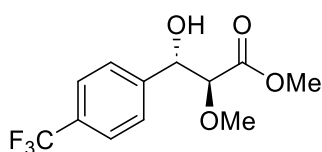

Methyl (2*S*,3*S*)-3-(4-(trifluoromethyl)phenyl)-3-hydroxy-2-methoxypropanoate (**2e**)

Colorless liquid, 59.8 mg, 99% yield, 96% ee, 95:5 dr;  $[\alpha]_D^{20} = -2.4$  ( $c = 1.0$ ,  $\text{CHCl}_3$ ); HPLC (Chiralpak IB column, hexane/isopropanol = 90/10; flow rate = 1.0 mL/min; UV detection at 230 nm;  $t_R = 6.6$  min (*anti*),  $t_R = 7.4$  min (*anti*),  $t_R = 8.1$  min (*syn*),  $t_R = 8.8$  min (*syn*).  $^1\text{H}$  NMR (400 MHz,  $\text{CDCl}_3$ )  $\delta$  7.60 (d,  $J = 8.1$  Hz, 2H), 7.48 (d,  $J = 8.1$  Hz, 2H), 5.03 (t,  $J = 4.8$  Hz, 1H), 3.97 (d,  $J = 5.7$  Hz, 1H), 3.68 (s, 3H), 3.38 (s, 3H), 3.25 (d,  $J = 4.5$  Hz, 1H).  $^{13}\text{C}$  NMR (101 MHz,  $\text{CDCl}_3$ )  $\delta$  170.5, 143.4, 130.2 (q,  $J = 32.5$  Hz), 126.9, 125.1 (q,  $J = 3.8$  Hz), 124.0 (q,  $J = 272.1$  Hz), 84.2, 73.4, 59.0, 52.0.  $^{19}\text{F}$  NMR (377 MHz,  $\text{CDCl}_3$ )  $\delta$  -62.58. HRMS (ESI)  $m/z$  calcd. for  $\text{C}_{12}\text{H}_{13}\text{F}_3\text{NaO}_4$   $[\text{M}+\text{Na}]^+$ : 301.0658, found: 301.0659.

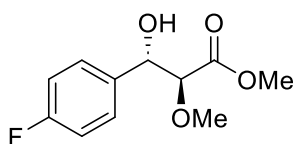

**Methyl (2*S*,3*S*)-3-(4-fluorophenyl)-3-hydroxy-2-methoxypropanoate (2f)**

Colorless liquid, 50.0 mg, 99% yield, 97% ee, 95:5 dr;  $[\alpha]_D^{20} = -1.8$  ( $c = 1.0$ ,  $\text{CHCl}_3$ ); HPLC (Chiralpak IC column, hexane/isopropanol = 95/55; flow rate = 1.0 mL/min; UV detection at 210 nm;  $t_R = 14.3$  min (*anti*),  $t_R = 15.3$  min (*anti*),  $t_R = 20.4$  min (*syn*),  $t_R = 29.7$  min (*syn*).  $^1\text{H}$  NMR (400 MHz,  $\text{CDCl}_3$ )  $\delta$  7.34 (dd,  $J = 8.6, 5.5$  Hz, 2H), 7.03 (t,  $J = 8.7$  Hz, 2H), 4.96 (t,  $J = 5.0$  Hz, 1H), 3.95 (d,  $J = 5.7$  Hz, 1H), 3.68 (s, 3H), 3.38 (s, 3H), 3.03 (d,  $J = 4.9$  Hz, 1H).  $^{13}\text{C}$  NMR (101 MHz,  $\text{CDCl}_3$ )  $\delta$  169.7, 161.5 (d,  $J = 246.3$  Hz), 134.1 (d,  $J = 3.2$  Hz), 127.3 (d,  $J = 8.3$  Hz), 114.1 (d,  $J = 21.4$  Hz), 83.3, 72.4, 57.9, 50.9.  $^{19}\text{F}$  NMR (376 MHz,  $\text{CDCl}_3$ )  $\delta$  -114.39 – -114.48 (m). HRMS (ESI)  $m/z$  calcd. for  $\text{C}_{11}\text{H}_{13}\text{FNaO}_4$   $[\text{M}+\text{Na}]^+$ : 251.0690, found: 251.0690.

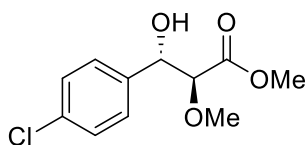

**Methyl (2*S*,3*S*)-3-(4-chlorophenyl)-3-hydroxy-2-methoxypropanoate (2g)**

Colorless liquid, 52.7 mg, 99% yield, 96% ee, 94:6 dr;  $[\alpha]_D^{20} = 3.1$  ( $c = 1.0$ ,  $\text{CHCl}_3$ ); HPLC (Chiralpak IC column, hexane/isopropanol = 95/5; flow rate = 1.0 mL/min; UV detection at 230 nm;  $t_R = 14.4$  min (*anti*),  $t_R = 15.4$  min (*anti*),  $t_R = 20.6$  min (*syn*),  $t_R = 30.1$  min (*syn*).  $^1\text{H}$  NMR (400 MHz,  $\text{CDCl}_3$ )  $\delta$  7.34 – 7.27 (m, 4H), 4.98 – 4.91 (m, 1H), 3.94 (d,  $J = 5.7$  Hz, 1H), 3.68 (s, 3H), 3.37 (s, 3H), 3.06 (s, 1H).  $^{13}\text{C}$  NMR (101 MHz,

CDCl<sub>3</sub>)  $\delta$  169.6, 136.9, 132.8, 127.4, 126.9, 83.2, 72.4, 58.0, 51.0. HRMS (ESI)  $m/z$  calcd. for C<sub>11</sub>H<sub>13</sub>ClNaO<sub>4</sub> [M+Na]<sup>+</sup>: 267.0395, found: 267.0395.

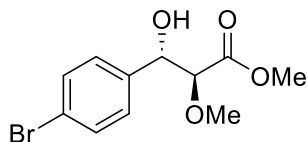

Methyl (2*S*,3*S*)-3-(4-bromophenyl)-3-hydroxy-2-methoxypropanoate (**2h**)

Colorless liquid, 61.7 mg, 99% yield, 98% ee, 96:4 dr;  $[\alpha]_D^{20} = 1.6$  ( $c = 1.0$ , CHCl<sub>3</sub>); HPLC (Chiralpak IC column, hexane/isopropanol = 95/5; flow rate = 1.0 mL/min; UV detection at 210 nm;  $t_R = 15.1$  min (*anti*),  $t_R = 16.3$  min (*anti*),  $t_R = 22.0$  min (*syn*),  $t_R = 29.3$  min (*syn*). <sup>1</sup>H NMR (400 MHz, CDCl<sub>3</sub>)  $\delta$  7.50 – 7.43 (m, 2H), 7.26 – 7.20 (m, 2H), 4.94 (dd,  $J = 6.0, 2.8$  Hz, 1H), 3.94 (d,  $J = 5.7$  Hz, 1H), 3.68 (s, 3H), 3.38 (s, 3H), 3.06 (d,  $J = 3.9$  Hz, 1H). <sup>13</sup>C NMR (101 MHz, CDCl<sub>3</sub>)  $\delta$  170.6, 138.4, 131.3, 128.3, 122.0, 84.2, 73.4, 59.0, 52.0. HRMS (ESI)  $m/z$  calcd. for C<sub>11</sub>H<sub>13</sub>BrNaO<sub>4</sub> [M+Na]<sup>+</sup>: 310.9889, found: 310.9889.

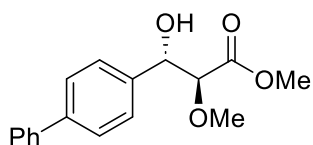

Methyl (2*S*,3*S*)-3-([1,1'-biphenyl]-4-yl)-3-hydroxy-2-methoxypropanoate (**2i**)

Colorless liquid, 61.4 mg, 99% yield, 99% ee, 95:5 dr;  $[\alpha]_D^{20} = 7.5$  ( $c = 1.0$ , CHCl<sub>3</sub>); HPLC (Chiralpak IC column, hexane/isopropanol = 85/15; flow rate = 1.0 mL/min; UV detection at 210 nm;  $t_R = 10.3$  min (*anti*),  $t_R = 12.3$  min (*anti*),  $t_R = 14.6$  min (*syn*),  $t_R = 19.2$  min (*syn*). <sup>1</sup>H NMR (400 MHz, CDCl<sub>3</sub>)  $\delta$  7.57 – 7.45 (m, 4H), 7.42 – 7.31 (m, 4H), 7.31 – 7.23 (m, 1H), 4.95 (t,  $J = 5.3$  Hz, 1H), 3.96 (d,  $J = 5.7$  Hz, 1H), 3.62 (s, 3H), 3.33 (s, 3H), 2.91 (d,  $J = 5.1$  Hz, 1H). <sup>13</sup>C NMR (101 MHz, CDCl<sub>3</sub>)  $\delta$  170.9, 140.9, 140.7, 138.4, 128.7, 127.3, 127.1, 127.0, 127.0, 84.5, 73.9, 59.0, 52.0. HRMS (ESI)  $m/z$  calcd. for C<sub>17</sub>H<sub>18</sub>NaO<sub>4</sub> [M+Na]<sup>+</sup>: 309.1097, found: 309.1099.

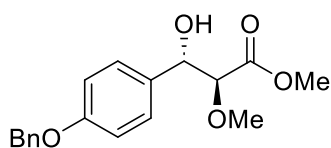

Methyl (2*S*,3*S*)-3-(4-(benzyloxy)phenyl)-3-hydroxy-2-methoxypropanoate (**2j**)

Colorless liquid, 67.5 mg, 99% yield, 99% ee, 99:1 dr;  $[\alpha]_D^{20} = 3.0$  ( $c = 1.0$ ,  $\text{CHCl}_3$ ); HPLC (Chiralpak IC column, hexane/isopropanol = 90/10; flow rate = 1.0 mL/min; UV detection at 210 nm;  $t_R=21.1$  min (*anti*),  $t_R=29.1$  min (*anti*),  $t_R=32.6$  min (*syn*).  $^1\text{H}$  NMR (400 MHz,  $\text{CDCl}_3$ )  $\delta$  7.49 – 7.35 (m, 4H), 7.35 – 7.23 (m, 3H), 6.99 – 6.90 (m, 2H), 5.05 (s, 2H), 4.92 (t,  $J = 5.3$  Hz, 1H), 3.96 (d,  $J = 5.8$  Hz, 1H), 3.68 (s, 3H), 3.37 (s, 3H), 2.85 (d,  $J = 5.1$  Hz, 1H).  $^{13}\text{C}$  NMR (101 MHz,  $\text{CDCl}_3$ )  $\delta$  170.9, 158.6, 136.9, 131.9, 128.6, 127.9, 127.9, 127.8, 127.5, 114.6, 84.5, 73.7, 70.0, 58.9, 51.9. HRMS (ESI)  $m/z$  calcd. for  $\text{C}_{18}\text{H}_{20}\text{NaO}_4$   $[\text{M}+\text{Na}]^+$ : 339.1203, found: 339.1204.

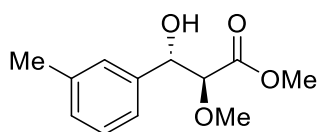

Methyl (2*S*,3*S*)-3-hydroxy-2-methoxy-3-(*m*-tolyl)propanoate (**2k**)

Colorless liquid, 49.1 mg, 99% yield, 96% ee, 95:5 dr;  $[\alpha]_D^{20} = 0.8$  ( $c = 1.0$ ,  $\text{CHCl}_3$ ); HPLC (Chiralpak IC column, hexane/isopropanol = 85/15; flow rate = 1.0 mL/min; UV detection at 210 nm;  $t_R=8.8$  min (*anti*),  $t_R=10.5$  min (*anti*),  $t_R=12.9$  min (*syn*),  $t_R=18.9$  min (*syn*).  $^1\text{H}$  NMR (400 MHz,  $\text{CDCl}_3$ )  $\delta$  7.23 (t,  $J = 7.5$  Hz, 1H), 7.19 – 7.06 (m, 3H), 4.94 (t,  $J = 5.2$  Hz, 1H), 3.99 (d,  $J = 5.8$  Hz, 1H), 3.68 (s, 3H), 3.38 (s, 3H), 2.84 (d,  $J = 5.0$  Hz, 1H), 2.35 (d,  $J = 0.8$  Hz, 3H).  $^{13}\text{C}$  NMR (101 MHz,  $\text{CDCl}_3$ )  $\delta$  169.9, 138.3, 136.9, 127.9, 127.1, 126.2, 122.6, 83.5, 73.1, 57.8, 50.8, 20.4. HRMS (ESI)  $m/z$  calcd. for  $\text{C}_{12}\text{H}_{16}\text{NaO}_4$   $[\text{M}+\text{Na}]^+$ : 247.0941, found: 247.0942.

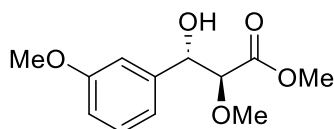

Methyl (2*S*,3*S*)-3-hydroxy-2-methoxy-3-(3-methoxyphenyl)propanoate (**2l**)

Colorless liquid, 52.2 mg, 99% yield, 97% ee, 95:5 dr;  $[\alpha]_D^{20} = -2.7$  ( $c = 1.0$ ,  $\text{CHCl}_3$ ); HPLC (Chiralpak IB column, hexane/isopropanol = 90/10; flow rate = 1.0 mL/min; UV detection at 210 nm;  $t_R=10.3$  min (*anti*),  $t_R=11.2$  min (*anti*),  $t_R=12.0$  min (*syn*).  $^1\text{H}$  NMR (400 MHz,  $\text{CDCl}_3$ )  $\delta$  7.25 (t,  $J = 8.0$  Hz, 1H), 6.94 (dd,  $J = 7.5, 1.4$  Hz, 2H), 6.88 – 6.80 (m, 1H), 4.95 (t,  $J = 4.9$  Hz, 1H), 3.98 (d,  $J = 5.8$  Hz, 1H), 3.80 (s, 3H), 3.69 (s, 3H), 3.37 (s, 3H), 2.94 (d,  $J = 4.8$  Hz, 1H).  $^{13}\text{C}$  NMR (101 MHz,  $\text{CDCl}_3$ )  $\delta$  170.8, 159.5,

141.1, 129.3, 118.8, 113.7, 112.0, 84.4, 74.0, 58.9, 55.2, 51.9. HRMS (ESI)  $m/z$  calcd. for  $C_{12}H_{16}NaO_5$   $[M+Na]^+$ : 263.0890, found: 263.0890.

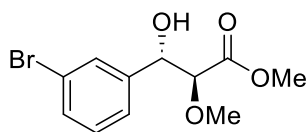

Methyl (2*S*,3*S*)-3-(3-bromophenyl)-3-hydroxy-2-methoxypropanoate (**2m**)

Colorless liquid, 60.7 mg, 99% yield, 95% ee, 95:5 dr;  $[\alpha]_D^{20} = 1.2$  ( $c = 1.0$ ,  $CHCl_3$ ); HPLC (Chiralpak IC column, hexane/isopropanol = 85/15; flow rate = 1.0 mL/min; UV detection at 230 nm;  $t_R = 6.5$  min (*anti*),  $t_R = 7.9$  min (*anti*),  $t_R = 8.2$  min (*syn*),  $t_R = 10.0$  min (*syn*).  $^1H$  NMR (400 MHz,  $CDCl_3$ )  $\delta$  7.53 (t,  $J = 1.9$  Hz, 1H), 7.43 (ddd,  $J = 7.8, 2.0, 1.2$  Hz, 1H), 7.31 – 7.25 (m, 1H), 7.21 (t,  $J = 7.8$  Hz, 1H), 4.95 (t,  $J = 5.2$  Hz, 1H), 3.95 (d,  $J = 5.7$  Hz, 1H), 3.69 (s, 3H), 3.39 (s, 3H), 3.03 (d,  $J = 5.0$  Hz, 1H).  $^{13}C$  NMR (101 MHz,  $CDCl_3$ )  $\delta$  170.5, 141.7, 131.1, 129.8, 129.7, 125.2, 122.4, 84.2, 73.4, 59.0, 52.1, 52.0. HRMS (ESI)  $m/z$  calcd. for  $C_{11}H_{13}BrNaO_4$   $[M+Na]^+$ : 310.9889, found: 310.9890.

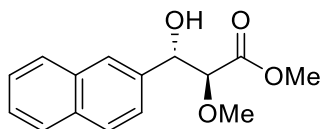

Methyl (2*S*,3*S*)-3-hydroxy-2-methoxy-3-(naphthalen-2-yl)propanoate (**2n**)

Colorless liquid, 56.3 mg, 99% yield, 99% ee, 94:6 dr;  $[\alpha]_D^{20} = 13.3$  ( $c = 1.0$ ,  $CHCl_3$ ); HPLC (Chiralpak IC column, hexane/isopropanol = 80/20; flow rate = 1.0 mL/min; UV detection at 260 nm;  $t_R = 8.4$  min (*anti*),  $t_R = 9.9$  min (*anti*),  $t_R = 11.4$  min (*syn*),  $t_R = 15.4$  min (*syn*).  $^1H$  NMR (400 MHz,  $CDCl_3$ )  $\delta$  7.82 (dd,  $J = 6.1, 3.3$  Hz, 4H), 7.53 – 7.41 (m, 3H), 5.13 (d,  $J = 5.8$  Hz, 1H), 4.07 (d,  $J = 5.8$  Hz, 1H), 3.65 (s, 3H), 3.37 (s, 3H), 3.12 (s, 1H).  $^{13}C$  NMR (101 MHz,  $CDCl_3$ )  $\delta$  169.8, 135.8, 132.1, 132.0, 127.0, 126.9, 126.6, 125.0, 125.0, 124.7, 123.3, 83.4, 73.2, 57.9, 50.9. HRMS (ESI)  $m/z$  calcd. for  $C_{15}H_{16}NaO_4$   $[M+Na]^+$ : 283.0941, found: 283.0941.

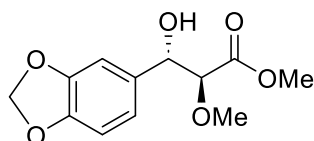

Methyl (2*S*,3*S*)-3-(benzo[d][1,3]dioxol-5-yl)-3-hydroxy-2-methoxypropanoate (**2o**)

Colorless liquid, 55.2 mg, 99% yield, 98% ee, 99:1 dr;  $[\alpha]_D^{20} = -5.0$  ( $c = 1.0$ ,  $CHCl_3$ );



HPLC (Chiralpak IA column, hexane/isopropanol = 95/5; flow rate = 1.0 mL/min; UV detection at 210 nm;  $t_R=35.2$  min (*anti*),  $t_R=38.6$  min (*anti*).  $^1\text{H}$  NMR (400 MHz,  $\text{CDCl}_3$ )  $\delta$  6.88 (d,  $J = 1.7$  Hz, 1H), 6.83 – 6.72 (m, 2H), 5.95 (d,  $J = 0.8$  Hz, 2H), 4.88 (d,  $J = 5.0$  Hz, 1H), 3.94 (d,  $J = 5.9$  Hz, 1H), 3.71 (s, 3H), 3.38 (s, 3H), 2.91 (d,  $J = 4.5$  Hz, 1H).  $^{13}\text{C}$  NMR (101 MHz,  $\text{CDCl}_3$ )  $\delta$  170.8, 147.6, 147.4, 133.4, 120.2, 108.0, 107.1, 101.0, 84.5, 73.9, 59.0, 52.0. HRMS (ESI)  $m/z$  calcd. for  $\text{C}_{12}\text{H}_{14}\text{NaO}_4$   $[\text{M}+\text{Na}]^+$  : 277.0683, found: 277.0683.

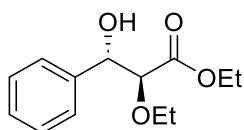

Ethyl (2*S*,3*S*)-2-ethoxy-3-hydroxy-3-phenylpropanoate (**2p**)

Colorless liquid, 51.6 mg, 99% yield, 99% ee, 97:3 dr;  $[\alpha]_D^{20} = -1.1$  ( $c = 1.0$ ,  $\text{CHCl}_3$ ); HPLC (Chiralpak IC column, hexane/isopropanol = 90/10; flow rate = 1.0 mL/min; UV detection at 210 nm;  $t_R=8.5$  min (*anti*),  $t_R=9.1$  min (*anti*),  $t_R=11.5$  min (*syn*),  $t_R=14.7$  min (*syn*).  $^1\text{H}$  NMR (600 MHz,  $\text{CDCl}_3$ )  $\delta$  7.40 – 7.35 (m, 2H), 7.35 – 7.31 (m, 2H), 7.31 – 7.27 (m, 1H), 4.98 (t,  $J = 5.3$  Hz, 1H), 4.11 (qd,  $J = 7.2, 1.9$  Hz, 2H), 4.03 (d,  $J = 5.9$  Hz, 1H), 3.65 (dq,  $J = 9.1, 7.0$  Hz, 1H), 3.38 (dq,  $J = 9.3, 7.0$  Hz, 1H), 3.03 (d,  $J = 4.8$  Hz, 1H), 1.15 (dt,  $J = 14.5, 7.1$  Hz, 6H).  $^{13}\text{C}$  NMR (151 MHz,  $\text{CDCl}_3$ )  $\delta$  169.7, 138.5, 127.1, 126.9, 125.6, 81.6, 73.0, 65.8, 59.9, 13.9, 12.9. HRMS (ESI)  $m/z$  calcd. for  $\text{C}_{13}\text{H}_{18}\text{NaO}_4$   $[\text{M}+\text{Na}]^+$  : 261.1097, found: 261.1097.

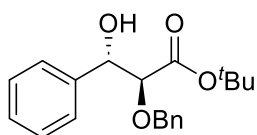

Tert-butyl (2*S*,3*S*)-2-(benzyloxy)-3-hydroxy-3-phenylpropanoate (**2q**)

Colorless liquid, 69.6 mg, 99% yield, 96% ee, 99:1 dr;  $[\alpha]_D^{20} = -11.6$  ( $c = 1.0$ ,  $\text{CHCl}_3$ ); HPLC (Chiralpak IC column, hexane/isopropanol = 95/5; flow rate = 1.0 mL/min; UV detection at 210 nm;  $t_R=13.4$  min (*anti*),  $t_R=15.4$  min (*anti*),  $t_R=20.6$  min (*syn*),  $t_R=23.4$  min (*syn*).  $^1\text{H}$  NMR (600 MHz,  $\text{CDCl}_3$ )  $\delta$  7.41 – 7.37 (m, 2H), 7.35 – 7.26 (m, 6H), 7.24 – 7.19 (m, 2H), 4.99 (t,  $J = 5.2$  Hz, 1H), 4.69 (d,  $J = 11.5$  Hz, 1H), 4.38 (d,  $J = 11.5$  Hz, 1H), 4.04 (d,  $J = 5.8$  Hz, 1H), 3.10 (d,  $J = 4.8$  Hz, 1H), 1.35 (s, 9H).  $^{13}\text{C}$  NMR

(151 MHz, CDCl<sub>3</sub>)  $\delta$  169.6, 139.6, 137.1, 128.4, 128.1, 128.1, 127.9, 127.8, 126.9, 82.2, 82.0, 74.2, 72.8, 27.9. HRMS (ESI)  $m/z$  calcd. for C<sub>20</sub>H<sub>24</sub>NaO<sub>4</sub> [M+Na]<sup>+</sup>: 351.1567, found: 351.1568.

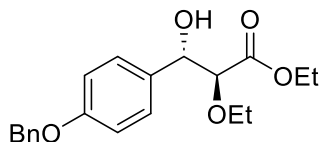

Ethyl (2*S*,3*S*)-3-(4-(benzyloxy)phenyl)-2-ethoxy-3-hydroxypropanoate (**2r**)

Colorless liquid, 63.0 mg, 99% yield, 99% ee, 99:1 dr; [ $\alpha$ ]<sub>D</sub><sup>20</sup> = -1.3 (c = 1.0, CHCl<sub>3</sub>); HPLC (Chiralpak IC column, hexane/isopropanol = 90/10; flow rate = 1.0 mL/min; UV detection at 210 nm;  $t_R$ =15.0 min (*anti*),  $t_R$ =16.9 min (*anti*),  $t_R$ =21.7 min (*syn*),  $t_R$ =22.9 min (*syn*). <sup>1</sup>H NMR (600 MHz, CDCl<sub>3</sub>)  $\delta$  7.42 (d,  $J$  = 7.1 Hz, 2H), 7.37 (t,  $J$  = 7.6 Hz, 2H), 7.30 (dd,  $J$  = 8.8, 2.4 Hz, 3H), 6.97 – 6.91 (m, 2H), 5.05 (s, 2H), 4.92 (t,  $J$  = 5.4 Hz, 1H), 4.12 (qd,  $J$  = 7.1, 1.8 Hz, 2H), 4.00 (d,  $J$  = 5.9 Hz, 1H), 3.65 (dq,  $J$  = 9.2, 7.0 Hz, 1H), 3.38 (dq,  $J$  = 9.2, 7.0 Hz, 1H), 2.95 (d,  $J$  = 5.0 Hz, 1H), 1.16 (td,  $J$  = 7.1, 4.2 Hz, 6H). <sup>13</sup>C NMR (151 MHz, CDCl<sub>3</sub>)  $\delta$  169.8, 157.5, 135.9, 131.0, 127.5, 126.9, 126.4, 113.5, 81.7, 72.6, 68.9, 65.8, 59.9, 14.0, 13.0. HRMS (ESI)  $m/z$  calcd. for C<sub>20</sub>H<sub>24</sub>NaO<sub>5</sub> [M+Na]<sup>+</sup>: 367.1516, found: 367.1517.

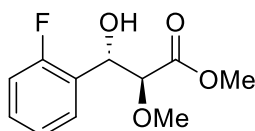

Methyl (2*S*,3*S*)-3-(2-fluorophenyl)-3-hydroxy-2-methoxypropanoate (**2s**)

Colorless liquid, 60.1 mg, 82% yield, 28% ee, 85:15 dr; [ $\alpha$ ]<sub>D</sub><sup>20</sup> = 3.3 (c = 1.0, CHCl<sub>3</sub>); HPLC (Chiralpak IC column, hexane/isopropanol = 95/5; flow rate = 1.0 mL/min; UV detection at 210 nm;  $t_R$ =18.0 min (*anti*),  $t_R$ =20.5 min (*anti*),  $t_R$ =25.7 min (*syn*),  $t_R$ =40.5 min (*syn*). <sup>1</sup>H NMR (400 MHz, CDCl<sub>3</sub>)  $\delta$  7.40 (td,  $J$  = 7.6, 1.8 Hz, 1H), 7.20 (m, 1H), 7.07 (td,  $J$  = 7.5, 1.2 Hz, 1H), 6.96 (ddd,  $J$  = 10.6, 8.2, 1.2 Hz, 1H), 5.27 (d,  $J$  = 4.8 Hz, 1H), 4.06 (d,  $J$  = 4.7 Hz, 1H), 3.55 (s, 3H), 3.37 (s, 3H). <sup>13</sup>C NMR (101 MHz, CDCl<sub>3</sub>)  $\delta$  169.19, 158.90 (d,  $J$  = 245.7 Hz), 128.50 (d,  $J$  = 8.3 Hz), 126.95 (d,  $J$  = 4.1 Hz), 125.14 (d,  $J$  = 13.0 Hz), 123.10 (d,  $J$  = 3.4 Hz), 114.04 (d,  $J$  = 21.7 Hz), 82.14 (d,  $J$  = 1.7 Hz), 67.46 (d,  $J$  = 2.4 Hz), 57.68, 50.80. <sup>19</sup>F NMR (376 MHz, CDCl<sub>3</sub>)  $\delta$  -106.87 –

-127.79 (m). HRMS (ESI)  $m/z$  calcd. for  $C_{20}H_{24}NaO_5$   $[M+Na]^+$ : 367.1516, found: 367.1517.

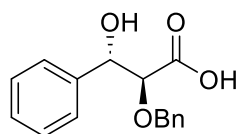

(2*S*,3*S*)-2-(Benzyloxy)-3-hydroxy-3-phenyl propanoic acid (**3**)<sup>[3]</sup>

Acid **3** was obtained by the hydrolysis of ester **2r**. Colorless liquid, 32.1 mg.  $[\alpha]_D^{20} = -16.8$  ( $c = 1.0$ ,  $CHCl_3$ );  $^1H$  NMR (600 MHz,  $CDCl_3$ )  $\delta$  7.40 – 7.26 (m, 8H), 7.14 (dd,  $J = 6.6, 2.9$  Hz, 2H), 5.00 (d,  $J = 6.2$  Hz, 1H), 4.62 (d,  $J = 11.5$  Hz, 1H), 4.38 (d,  $J = 11.5$  Hz, 1H), 4.14 (d,  $J = 6.2$  Hz, 1H).  $^{13}C$  NMR (151 MHz,  $CDCl_3$ )  $\delta$  173.9, 138.9, 136.3, 128.5, 128.3, 128.2, 128.2, 126.9, 81.3, 74.2, 73.5.

### 3. Synthetic Applications

#### Scale-up synthesis of **2a**

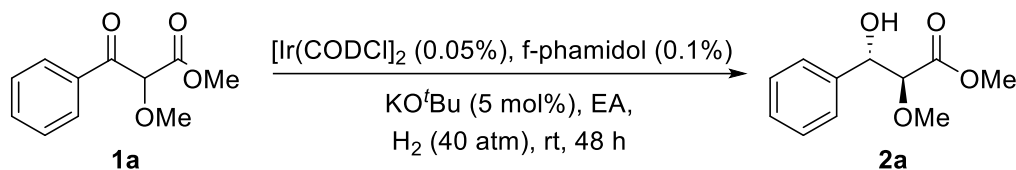

To a 2.5 mL vial was added the catalyst precursor  $[Ir(COD)Cl]_2$  (3.4 mg, 0.005 mmol), f-phamidol (5.9 mg, 0.0105 mmol) and anhydrous EtOAc (1 mL) under argon atmosphere. The mixture was stirred for 1 h at room temperature to give a clear orange solution. An aliquot of the catalyst solution (200  $\mu$ L, 0.001 mmol) was transferred into a 10.0 mL hydrogenation vessel, then  $Cs_2CO_3$  (32.5 mg, 0.1 mmol), **1a** (416 mg, 2.0 mmol) and anhydrous EtOAc (5 mL) was added. The vessels were placed in an autoclave which was then charged with 40 atm of  $H_2$  and stirred at 25-30  $^\circ C$  for 48 h. After slowly releasing the hydrogen pressure, the reaction mixture was passed through a short column of silica gel to get the pure product **2a** 413 mg, 98% yield, 98% ee, 96:4 dr.

The yield was determined by NMR analysis after the volatiles were removed under vacuum. The ee values were determined by HPLC analysis on a chiral stationary phase.

### Scale-up synthesis of **2r**

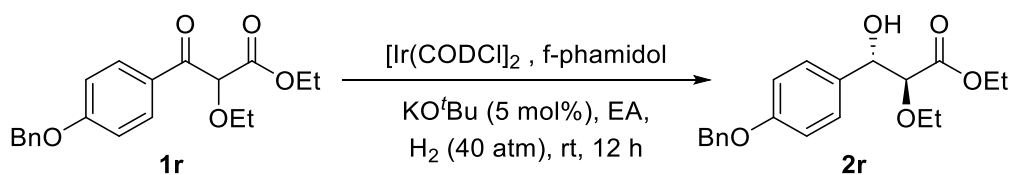

To a 20.0 mL vial equipped with  $\alpha$ -methoxy- $\beta$ -ketoesters **1r** (1.37 g, 4.0 mmol, 1.0 eq.) was added the Ir/f-phamidol-precatalyst (15.2 mg,  $1.0 \times 10^{-3}$  mmol, 0.005 eq.),  $\text{Cs}_2\text{CO}_3$  (65.1 mg, 0.2 mmol, 5 mol%) and anhydrous EtOAc (8.0 mL) in an argon-filled glovebox. The autoclave was quickly purged with hydrogen gas for three times, and then pressurized to 40 bar  $\text{H}_2$ . The reaction solution was stirred at room temperature for 48 h, and then the pressure was released carefully. After slowly releasing the hydrogen pressure, the reaction mixture was passed through a short column of silica gel to get the pure product **2r** (1.34 g, 99% yield, 99% ee, 99:1 dr).

The yield was determined by NMR analysis after the volatiles were removed under vacuum. The ee and dr values were determined by HPLC analysis on a chiral stationary phase.

## 4. NMR Spectra

### <sup>1</sup>H NMR spectra (400 MHz, CDCl<sub>3</sub>) of **1a**

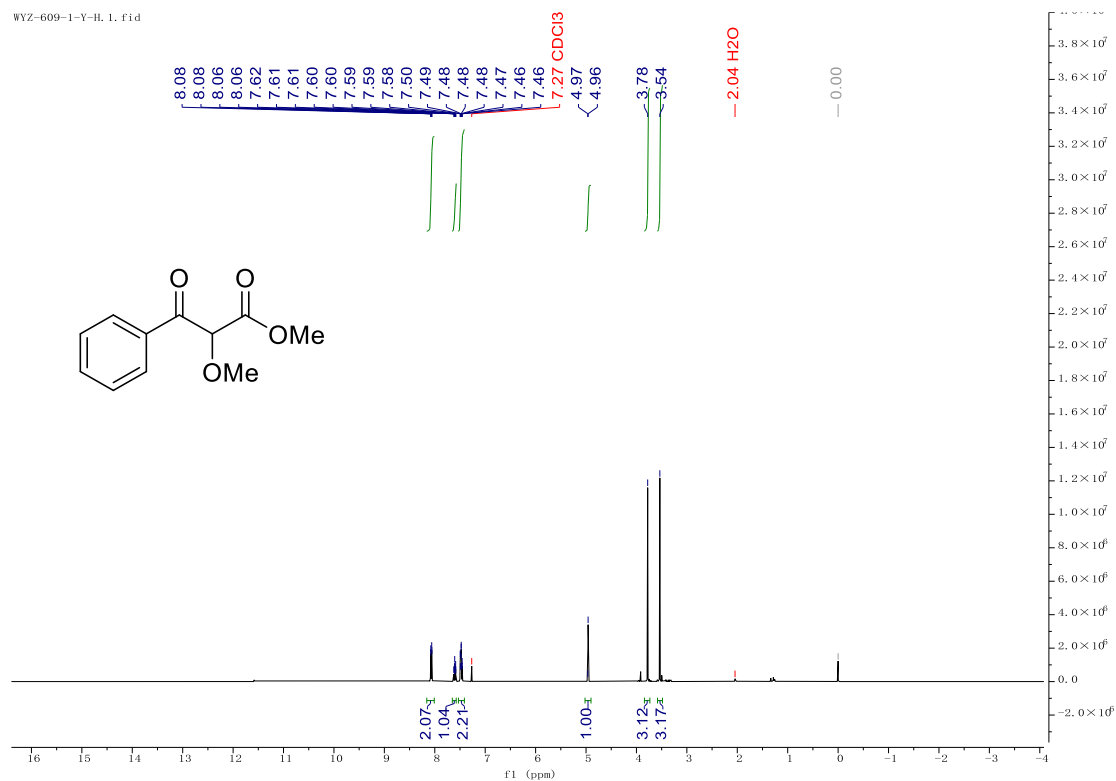

### <sup>13</sup>C NMR spectra (101 MHz, CDCl<sub>3</sub>) of **1a**

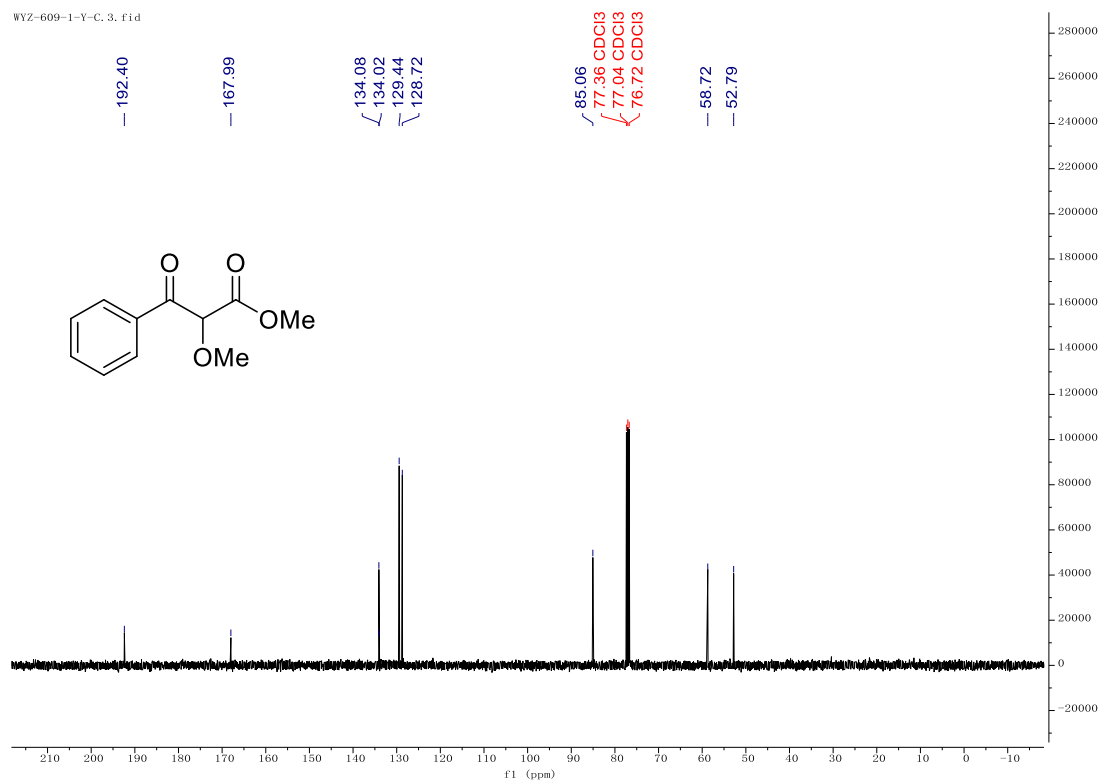

### <sup>1</sup>H NMR spectra (600 MHz, CDCl<sub>3</sub>) of **1b**

WYZ-609-6-Y-H.4.fid

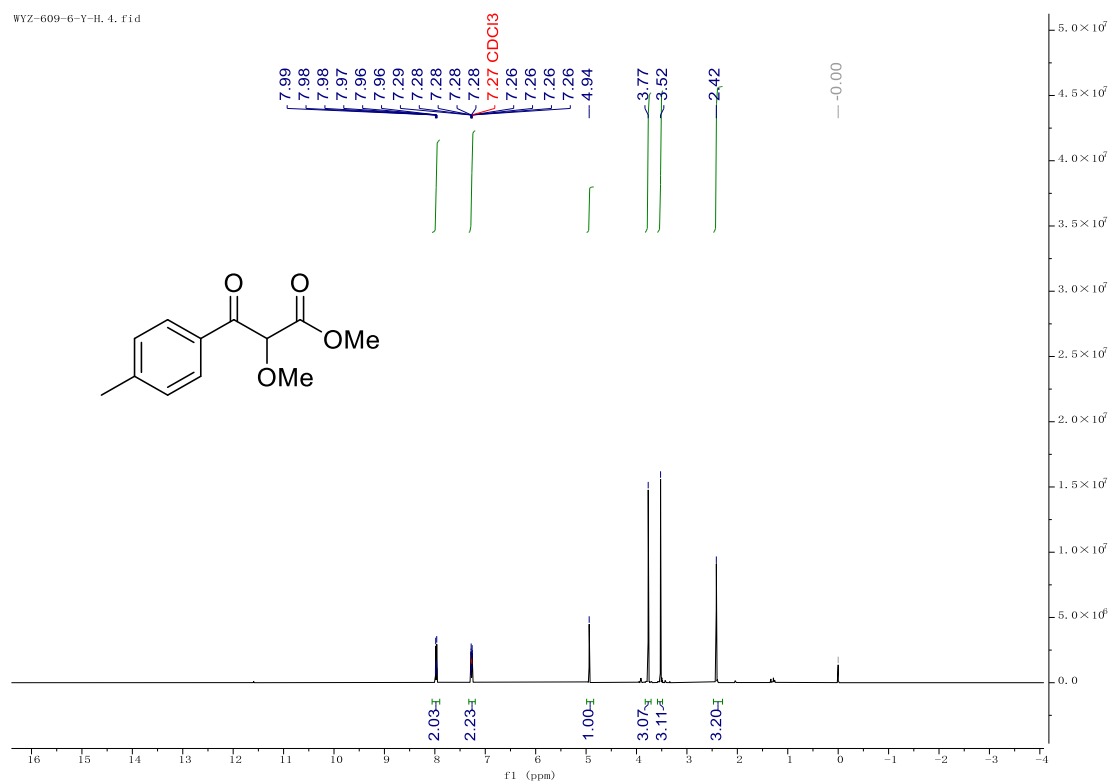

### <sup>13</sup>C NMR spectra (151 MHz, CDCl<sub>3</sub>) of **1b**

WYZ-609-6-Y-C.5.fid

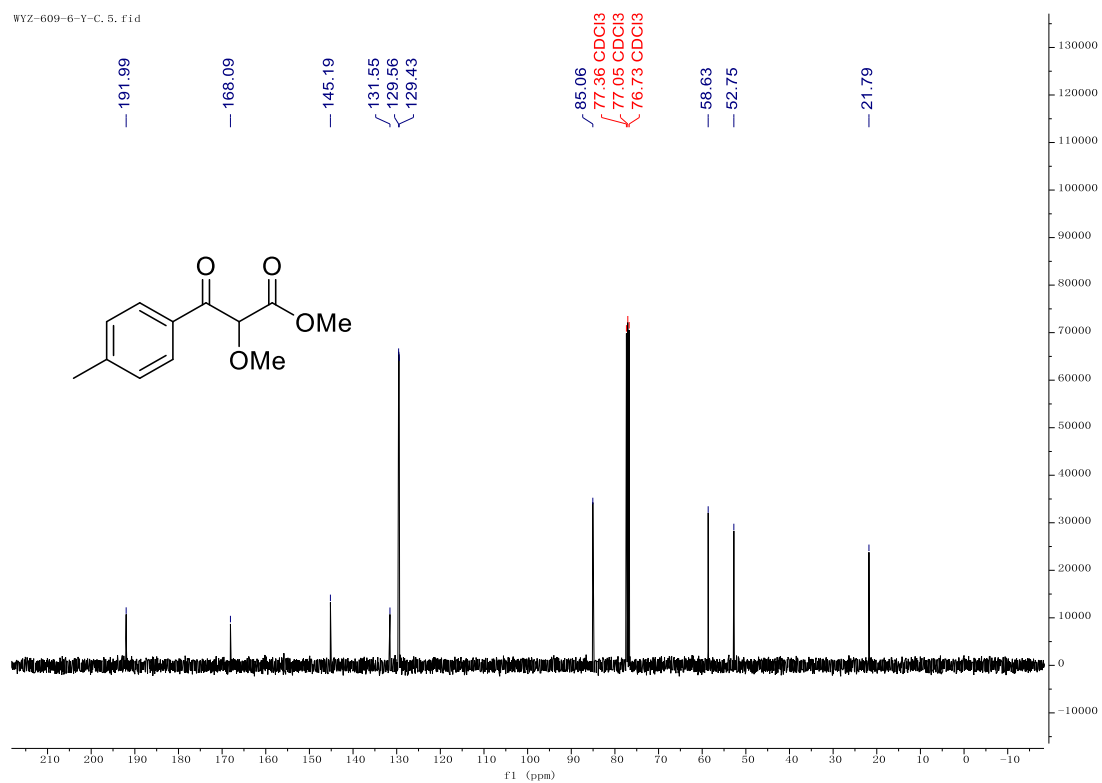

### <sup>1</sup>H NMR spectra (600 MHz, CDCl<sub>3</sub>) of **1c**

WYZ-610-1-Y-H.1.fid

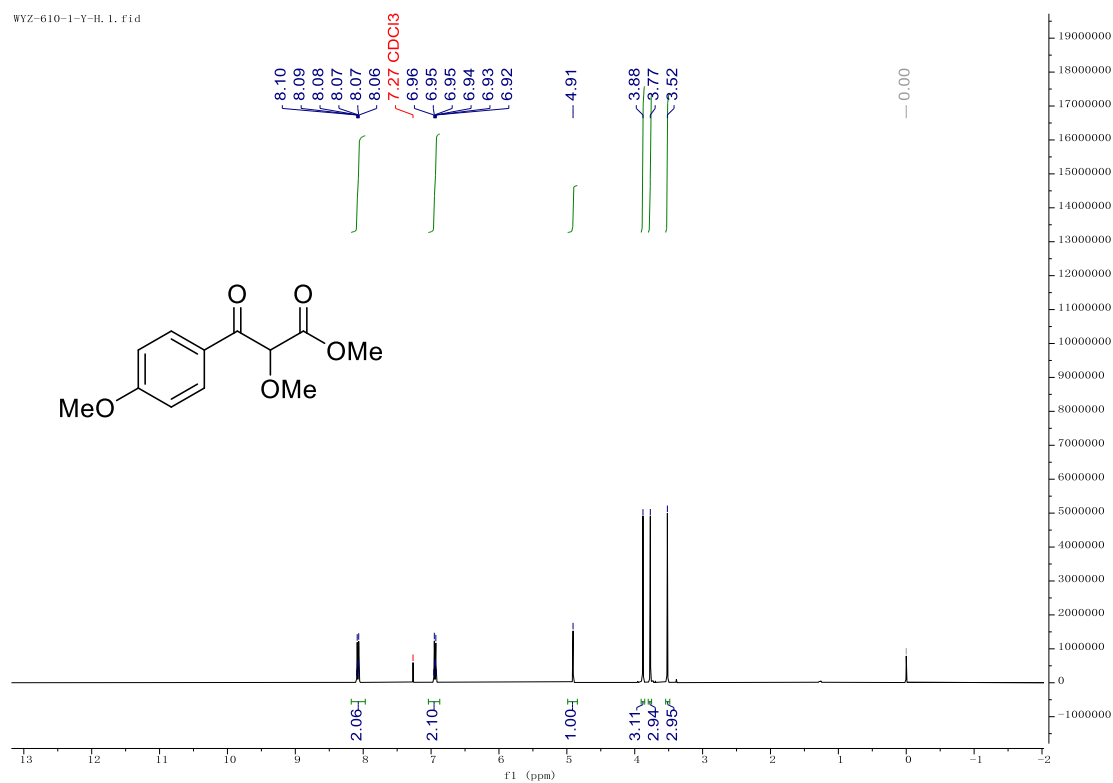

### <sup>13</sup>C NMR spectra (151 MHz, CDCl<sub>3</sub>) of **1c**

WYZ-610-1-Y-C.3.fid

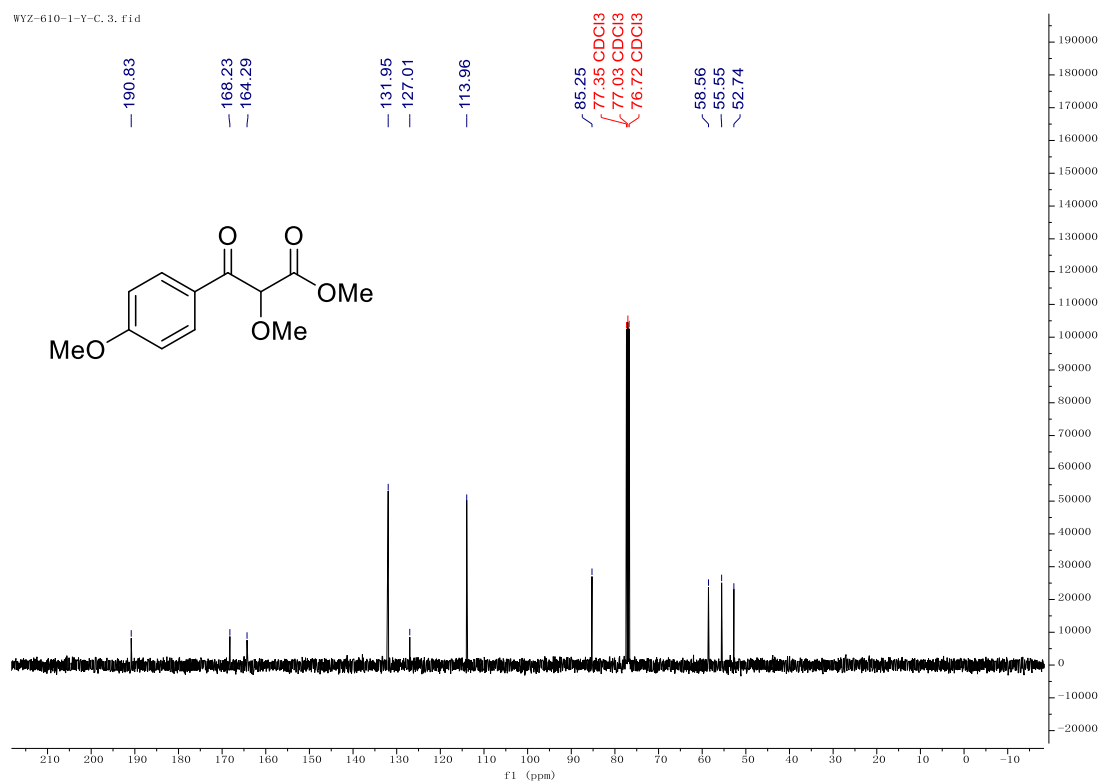

### <sup>1</sup>H NMR spectra (400 MHz, CDCl<sub>3</sub>) of **1d**

WVZ-610-2-Y-H.4.fid

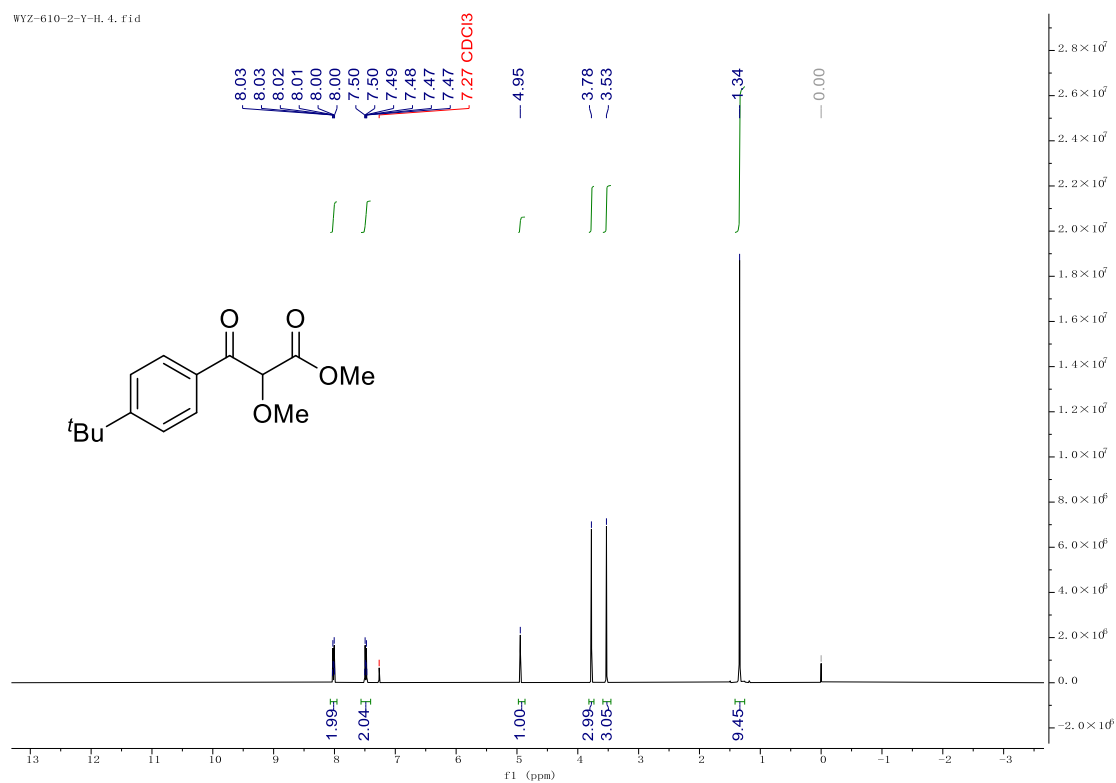

### <sup>13</sup>C NMR spectra (101 MHz, CDCl<sub>3</sub>) of **1d**

WVZ-610-2-Y-C.5.fid

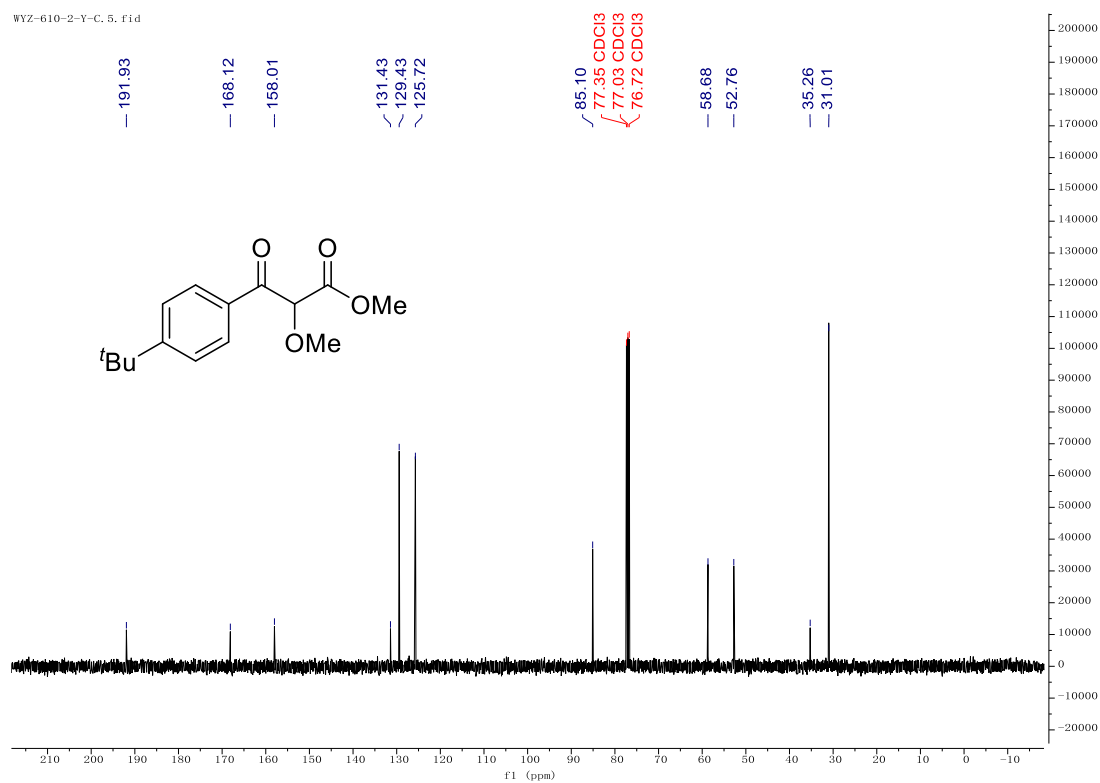



# <sup>1</sup>H NMR spectra (400 MHz, CDCl<sub>3</sub>) of **1e**

WYZ-609-5-Y2-H, 5, f1.d

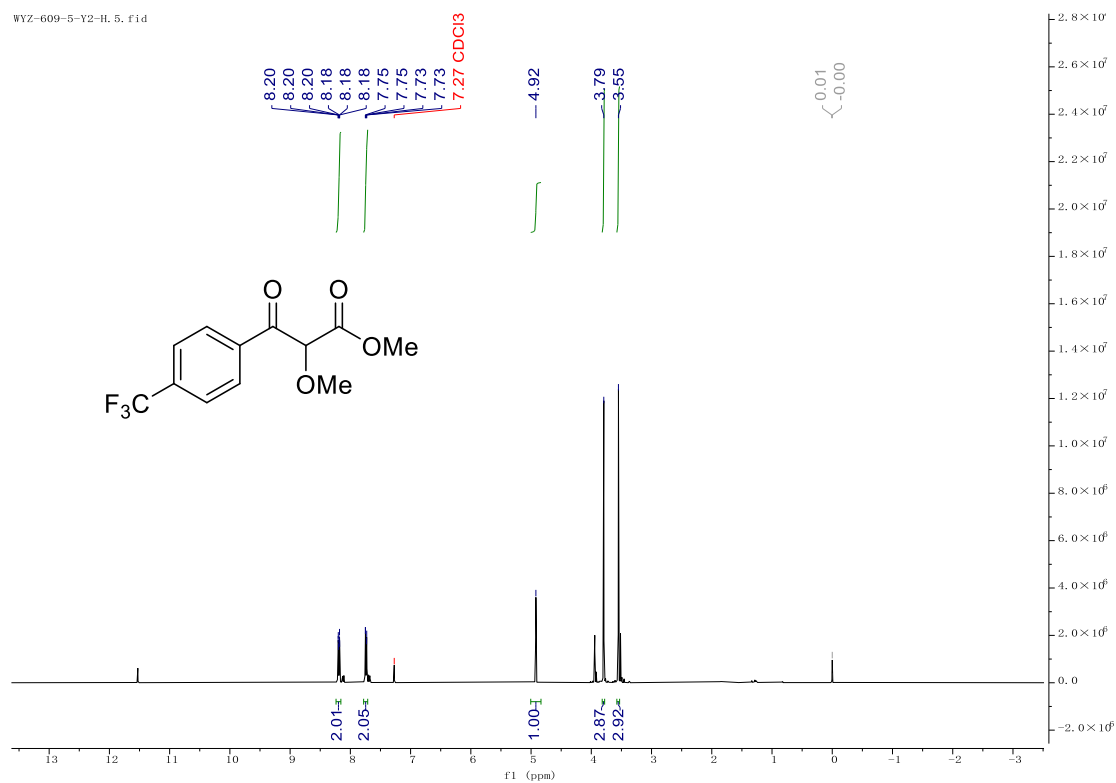

# <sup>13</sup>C NMR spectra (101 MHz, CDCl<sub>3</sub>) of **1e**

WYZ-609-5-Y2-C, 8, f1.d

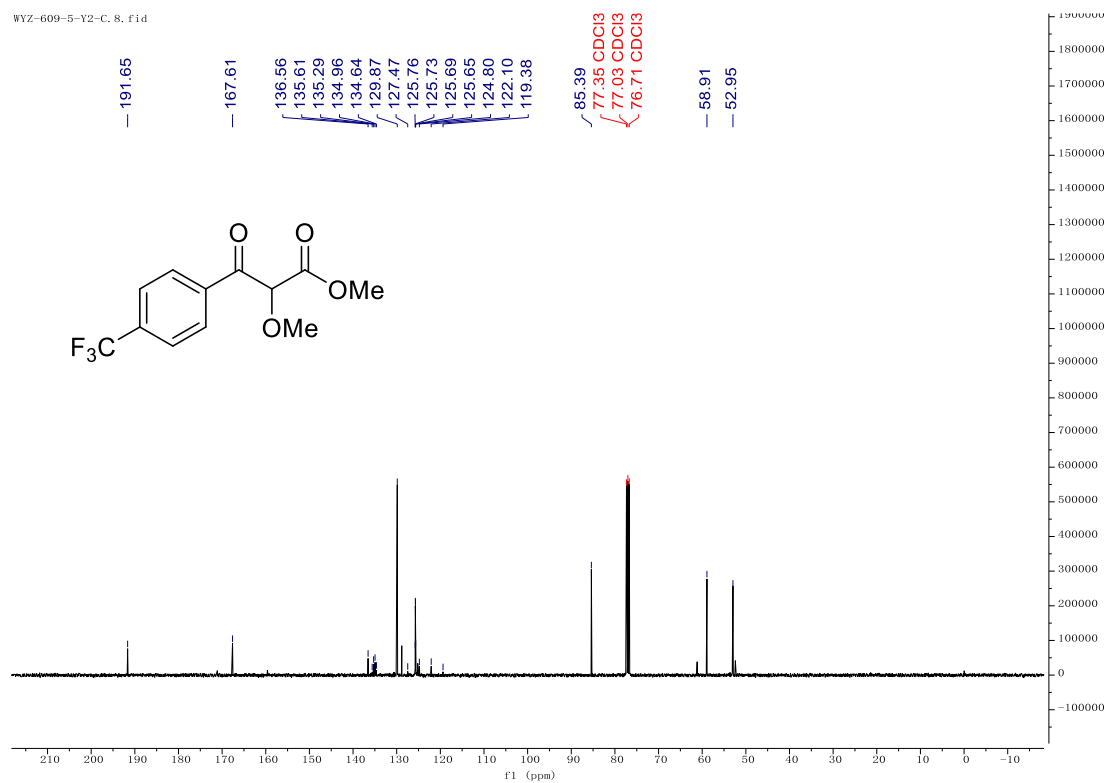

### <sup>19</sup>F NMR spectra (376 MHz, CDCl<sub>3</sub>) of **1e**

WYZ-609-5-Y2-F, 9, f1.d

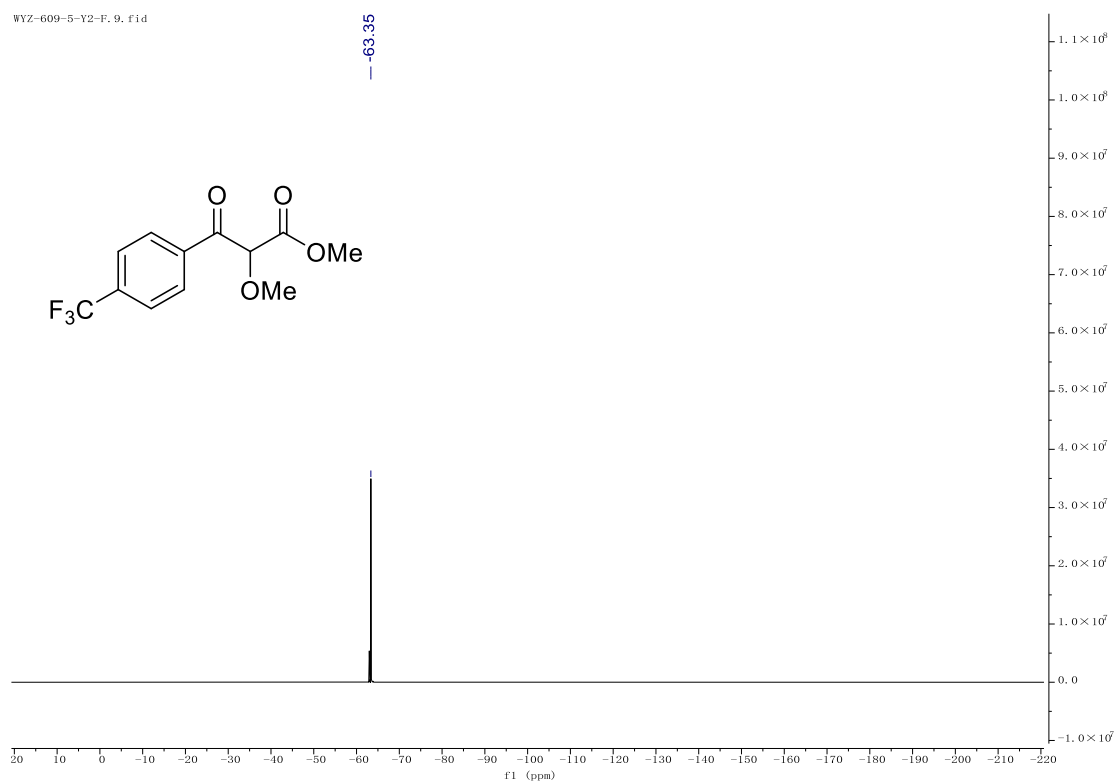

### <sup>1</sup>H NMR spectra (400 MHz, CDCl<sub>3</sub>) of **1f**

WYZ-609-2-Y2-H, 1, f1.d

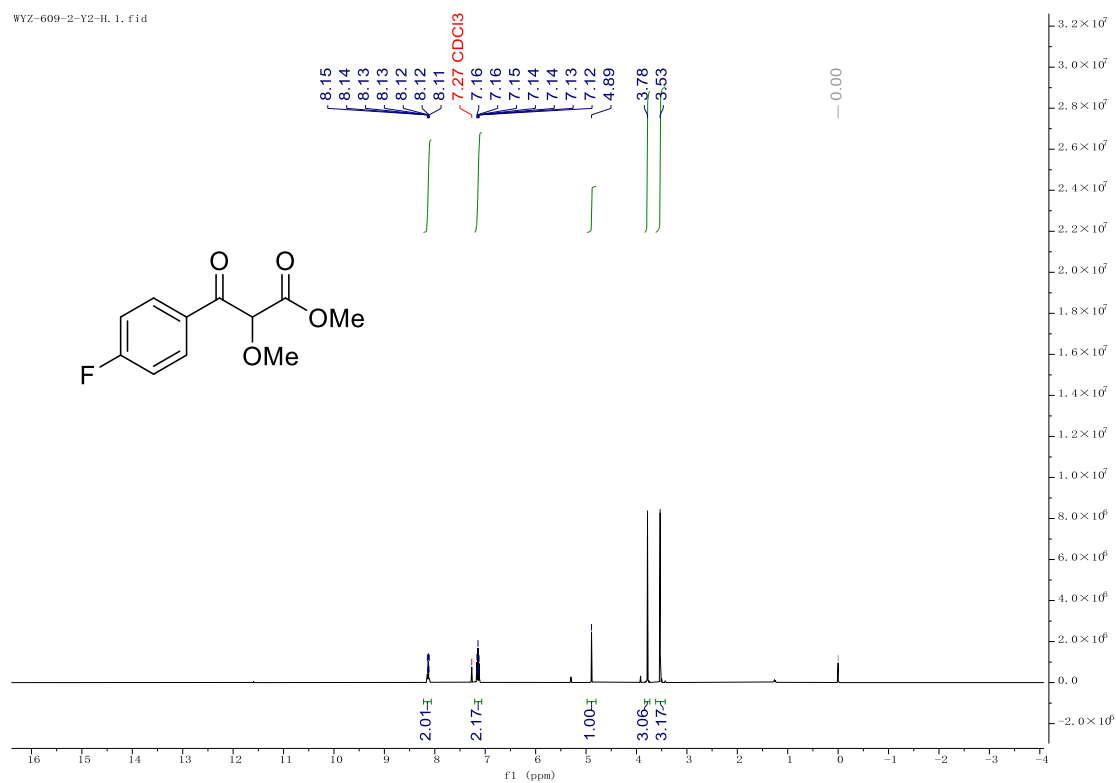

### <sup>13</sup>C NMR spectra (101 MHz, CDCl<sub>3</sub>) of **1f**

WVZ-609-2-Y2-C. 4. f1.d

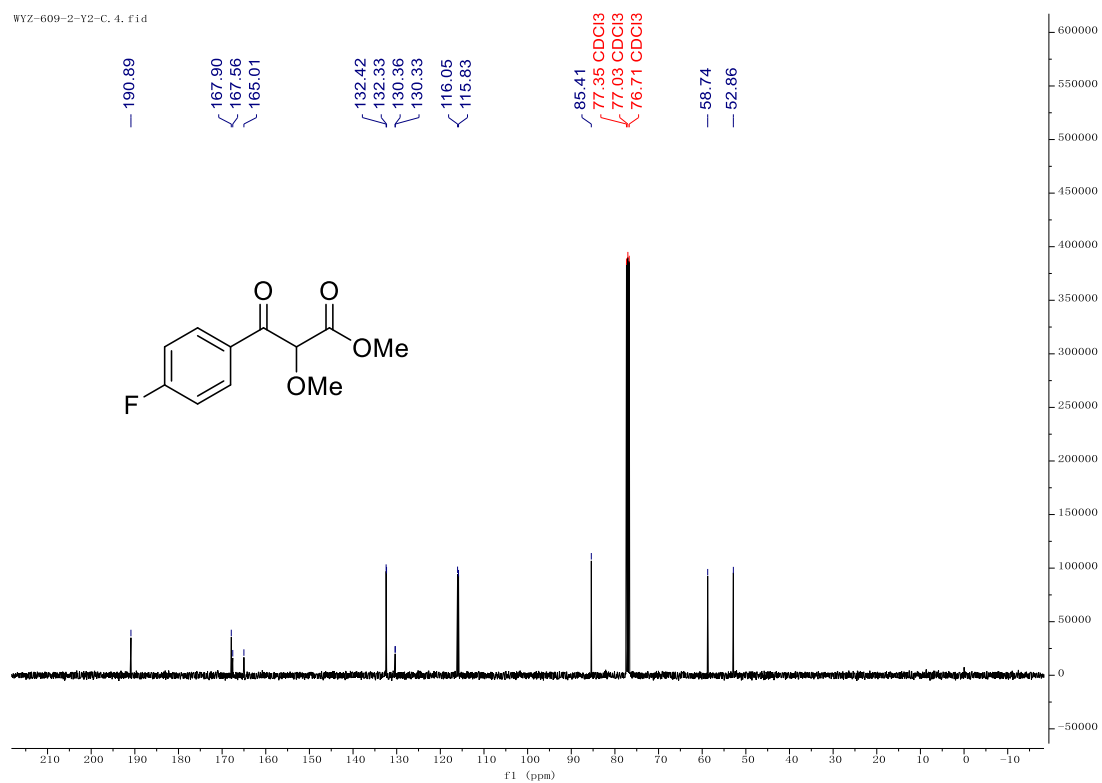

### <sup>19</sup>F NMR spectra (376 MHz, CDCl<sub>3</sub>) of **1f**

WVZ-609-2-Y2-F. 5. f1.d

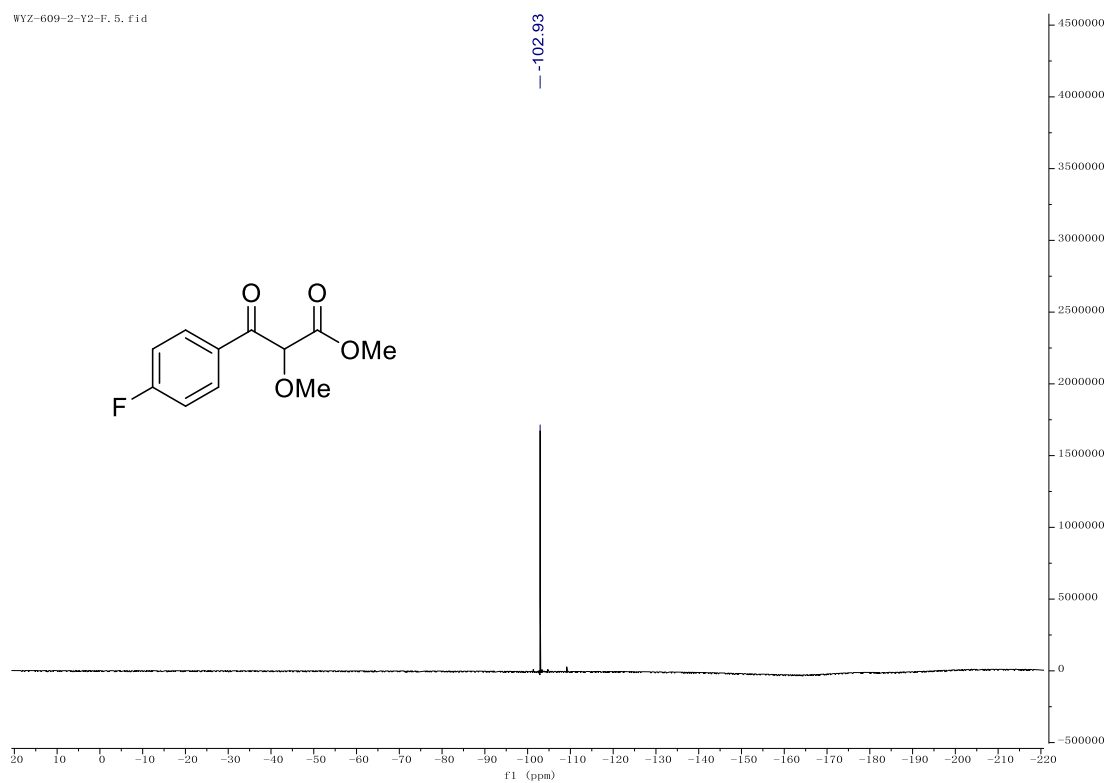

# <sup>1</sup>H NMR spectra (400 MHz, CDCl<sub>3</sub>) of **1g**

WVZ-609-3-Y-H.4.fid

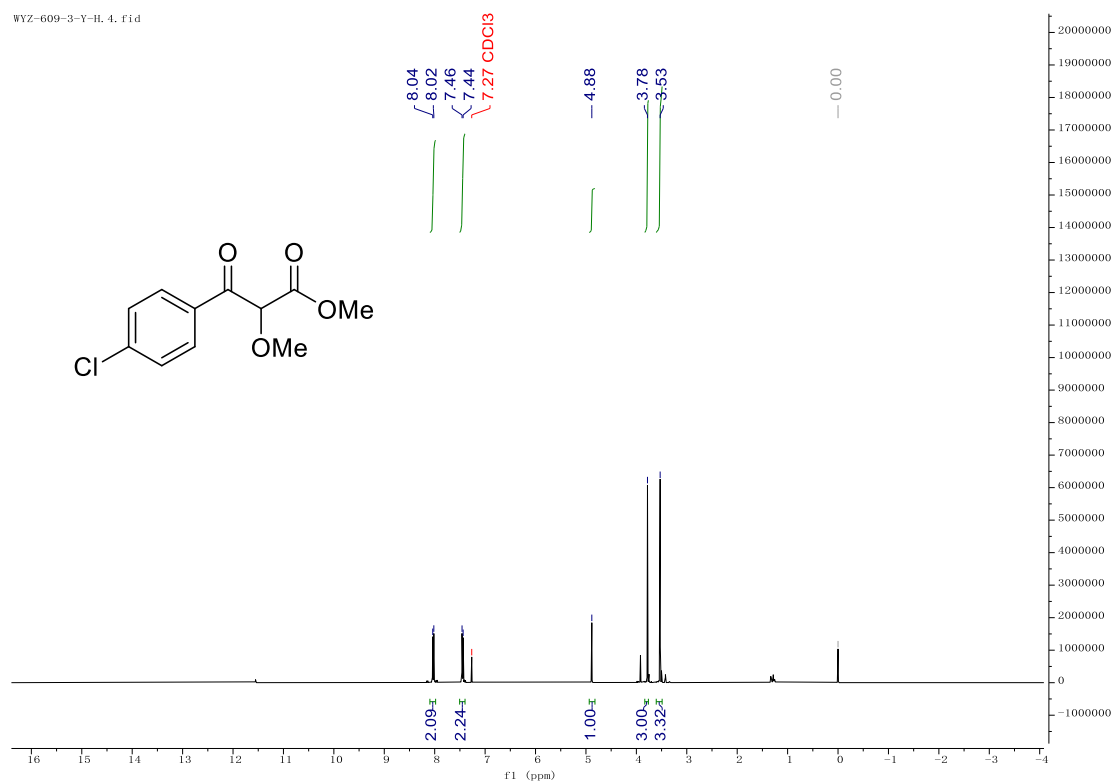

# <sup>13</sup>C NMR spectra (101 MHz, CDCl<sub>3</sub>) of **1g**

WVZ-609-3-Y-C.5.fid

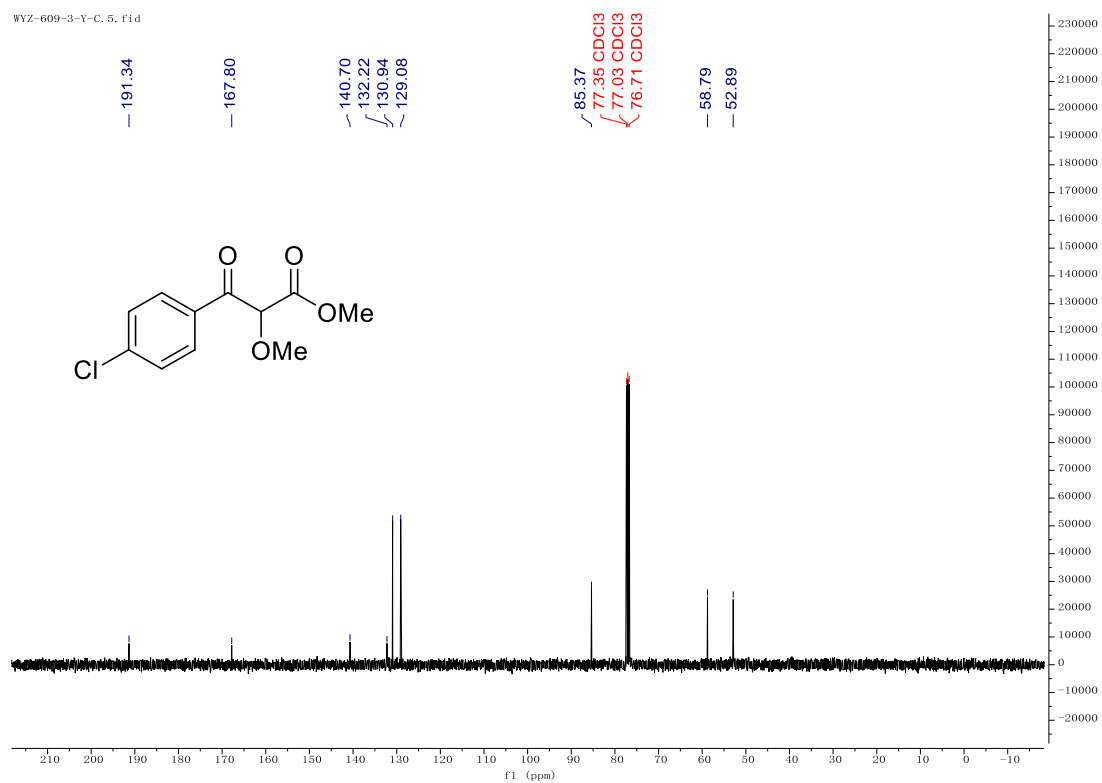

# <sup>1</sup>H NMR spectra (400 MHz, CDCl<sub>3</sub>) of **1h**

WYZ-609-4-Y-HL.4.fid

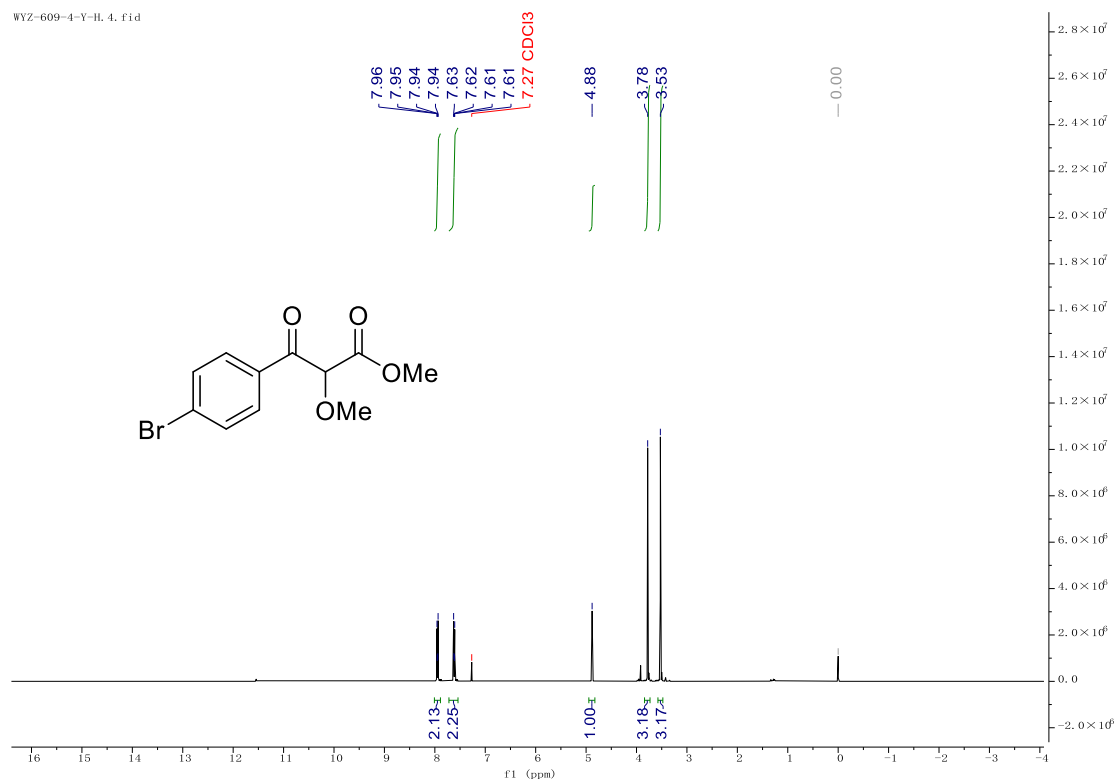

# <sup>13</sup>C NMR spectra (101 MHz, CDCl<sub>3</sub>) of **1h**

WYZ-609-4-Y-C.5.fid

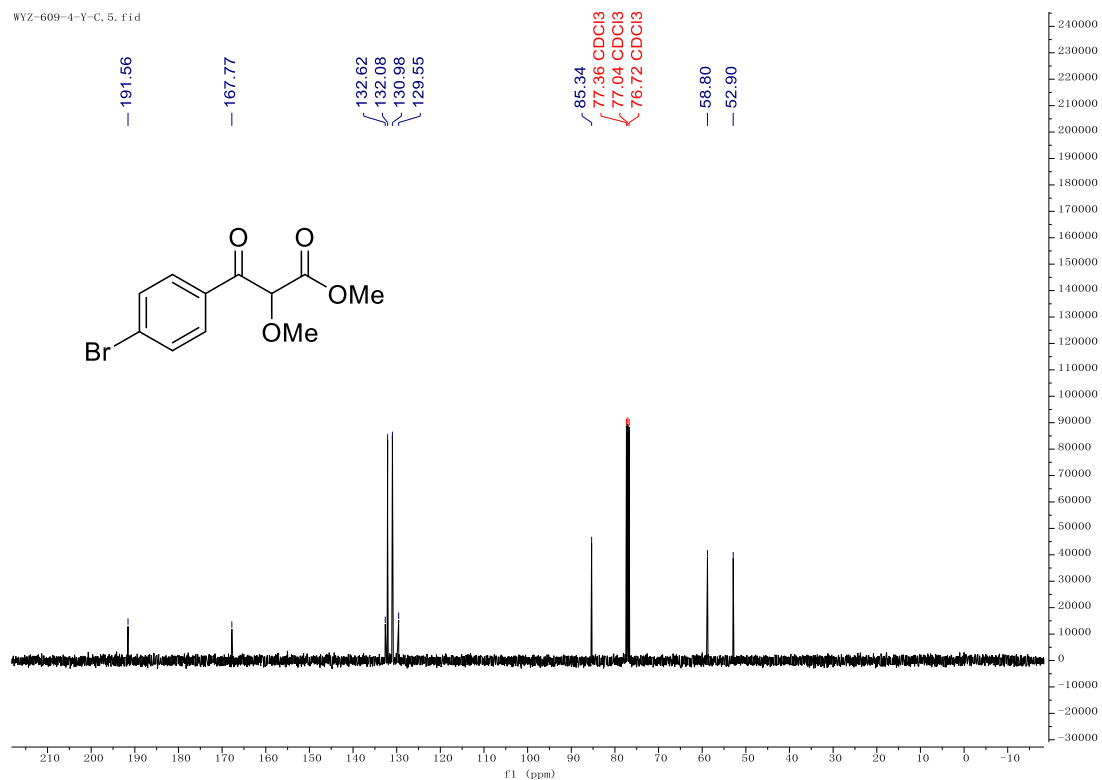

# <sup>1</sup>H NMR spectra (600 MHz, CDCl<sub>3</sub>) of **1i**

WYZ-610-3-Y-HL.27. fid

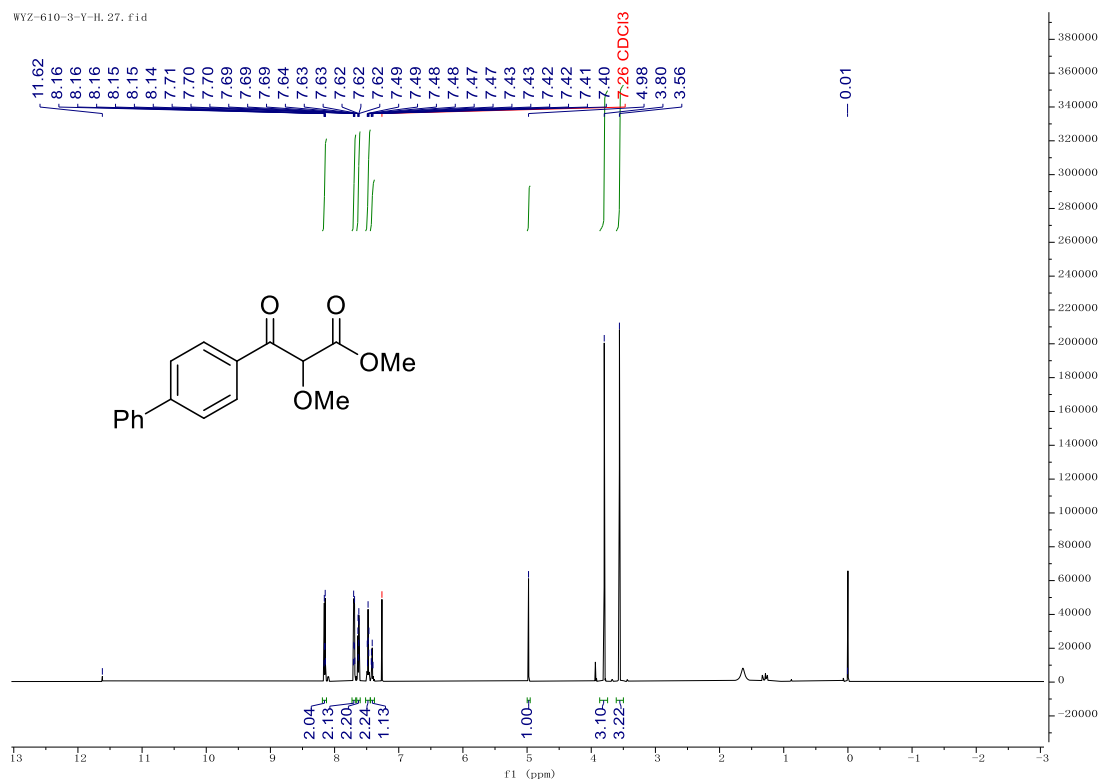

# <sup>13</sup>C NMR spectra (151 MHz, CDCl<sub>3</sub>) of **1i**

WYZ-610-3-Y-C.29. fid

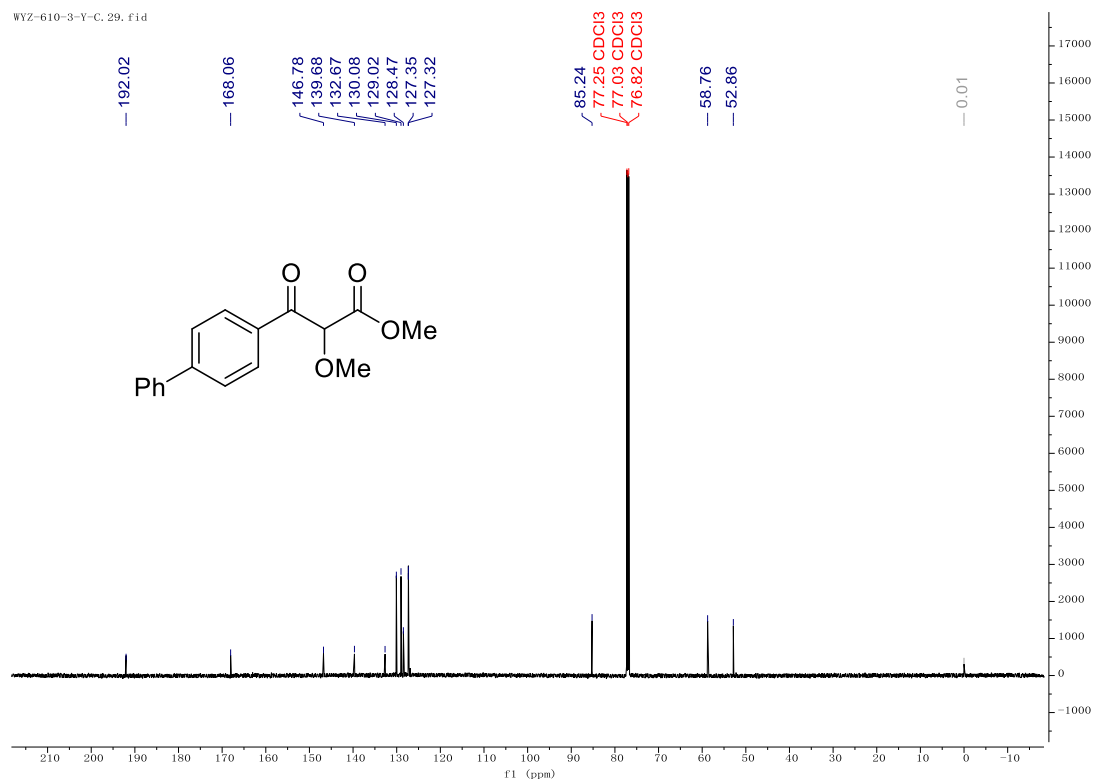

### <sup>1</sup>H NMR spectra (600 MHz, CDCl<sub>3</sub>) of **1j**

WYZ-612-4-Y-HL.4. f1d

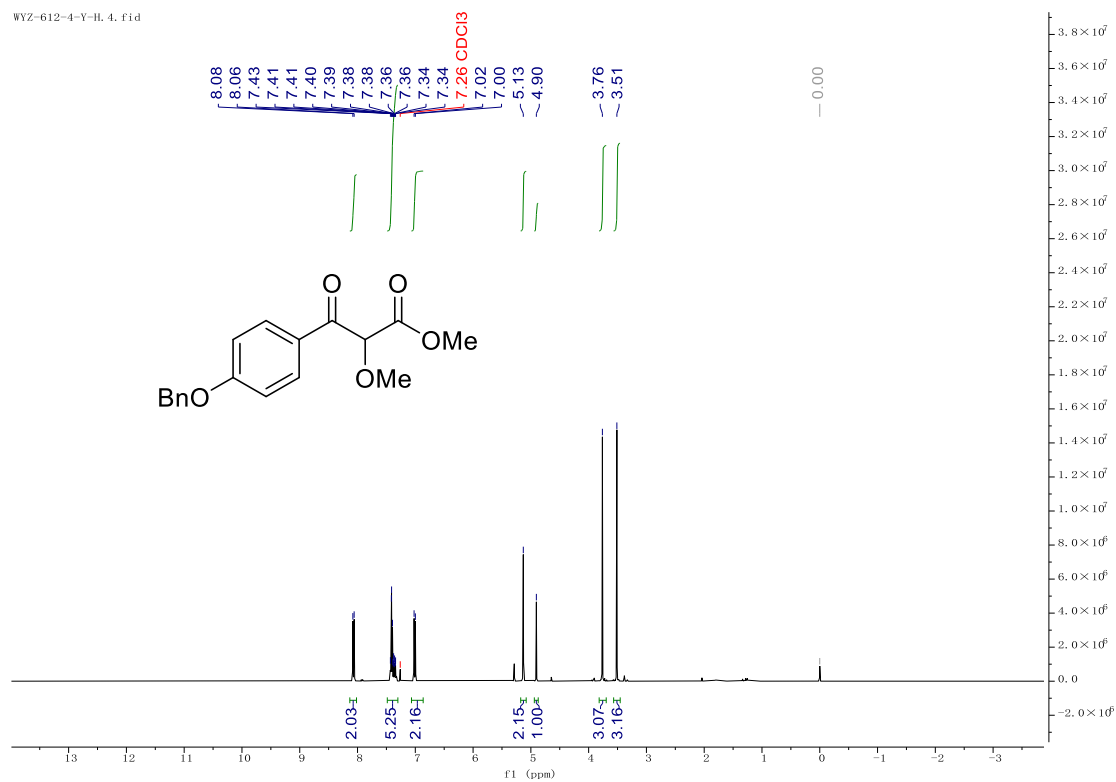

### <sup>13</sup>C NMR spectra (151 MHz, CDCl<sub>3</sub>) of **1j**

WYZ-612-4-Y-C.5. f1d

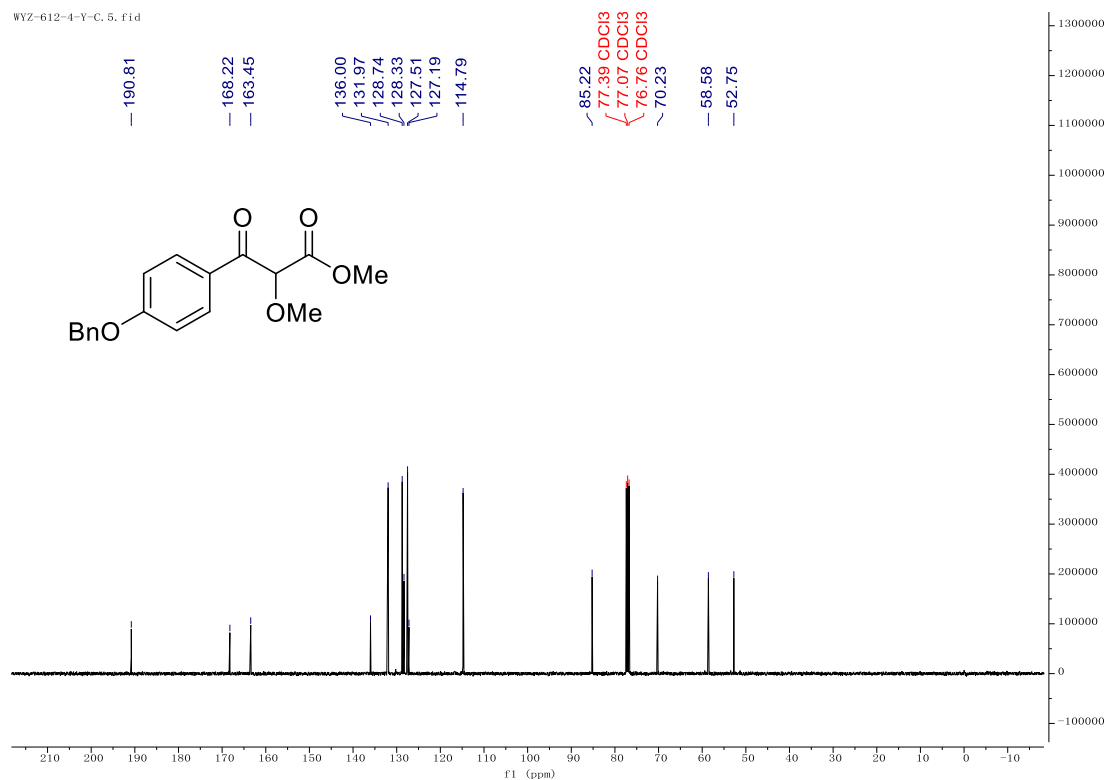

# <sup>1</sup>H NMR spectra (600 MHz, CDCl<sub>3</sub>) of **1k**

WVZ-610-4-Y-H.17.fid

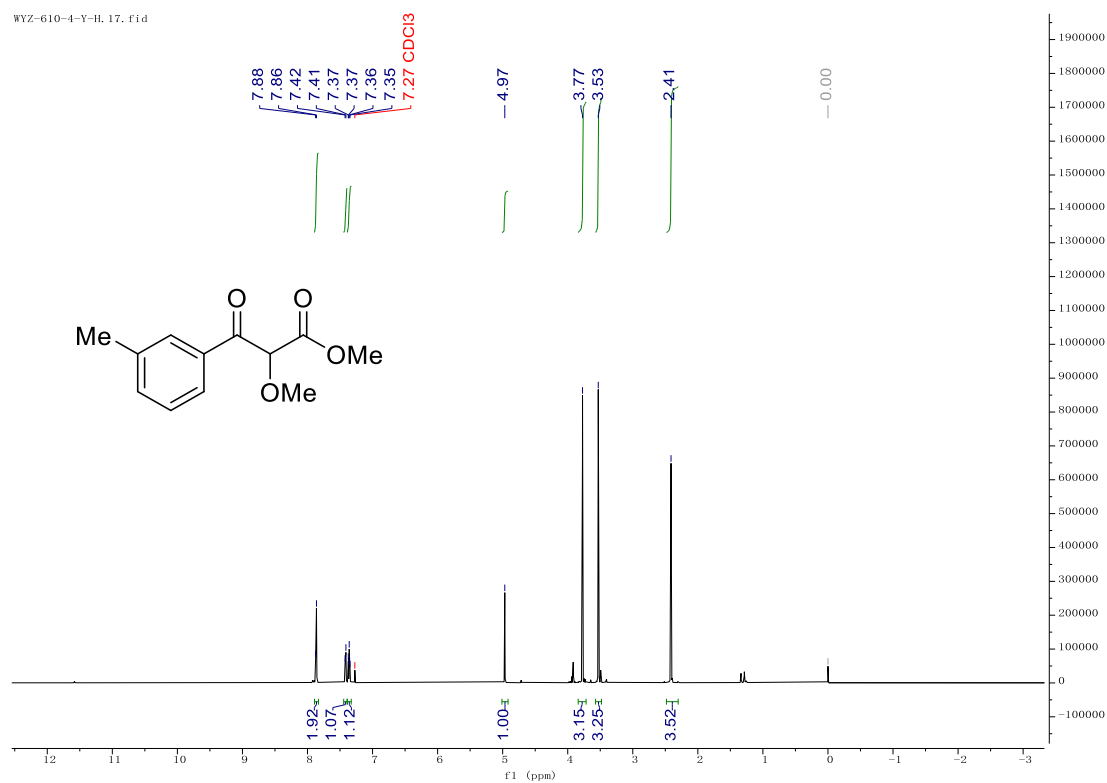

# <sup>13</sup>C NMR spectra (151 MHz, CDCl<sub>3</sub>) of **1k**

WVZ-610-4-Y-C.19.fid

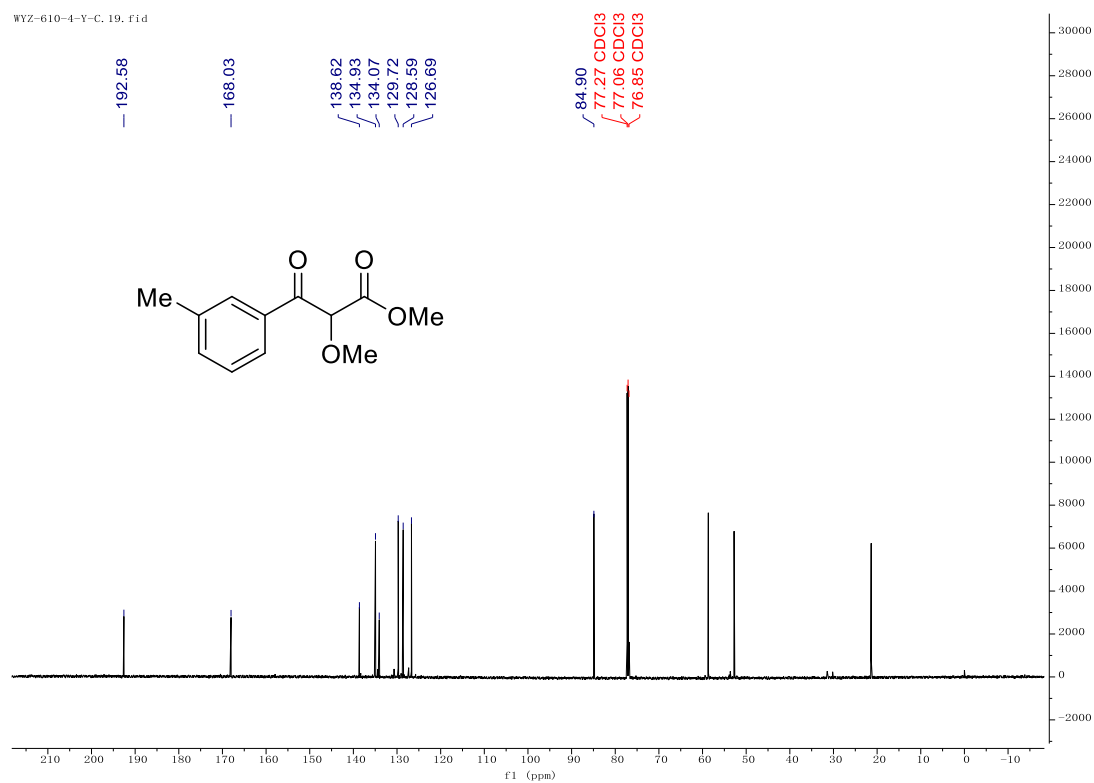



# <sup>1</sup>H NMR spectra (600 MHz, CDCl<sub>3</sub>) of **11**

WYZ-610-5-Y-H.10.fid

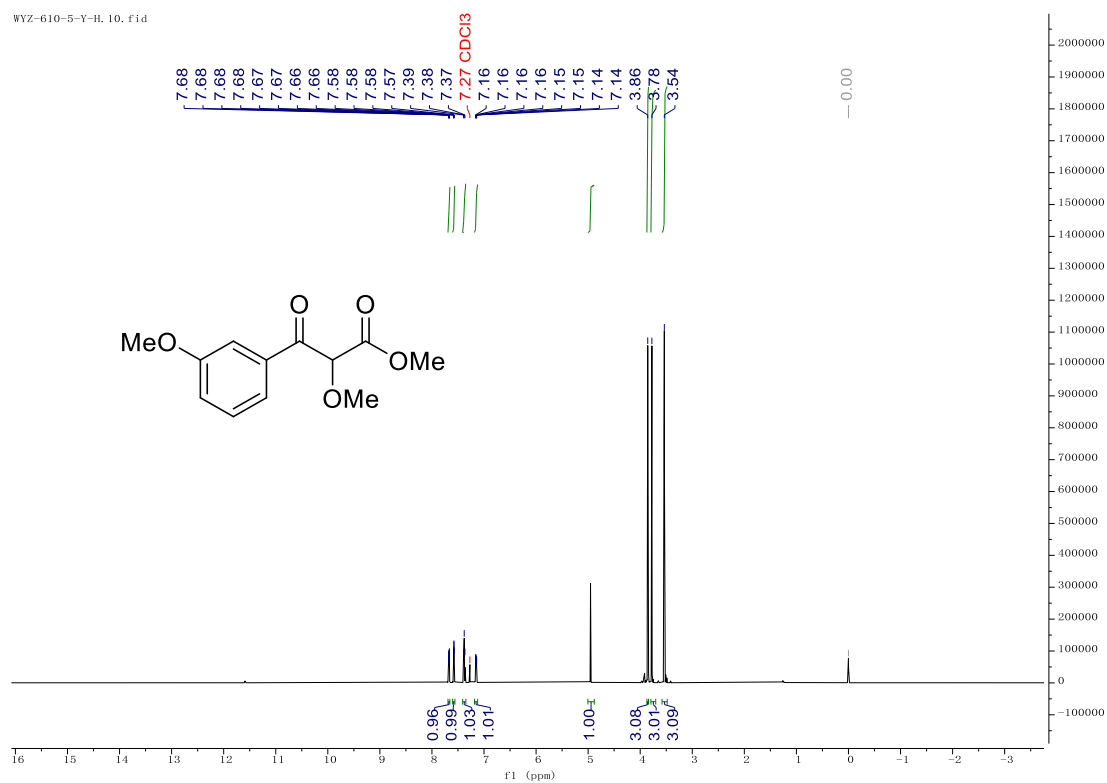

# <sup>13</sup>C NMR spectra (151 MHz, CDCl<sub>3</sub>) of **11**

WYZ-610-5-Y-C.12.fid

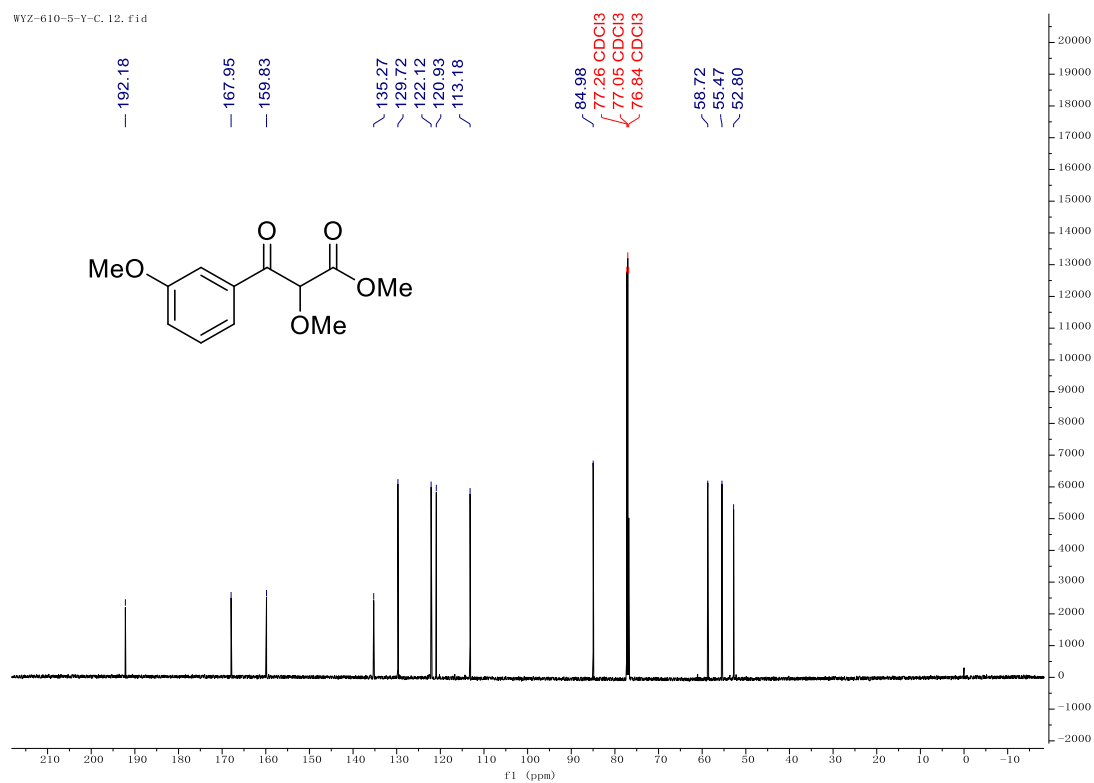

### <sup>1</sup>H NMR spectra (600 MHz, CDCl<sub>3</sub>) of **1m**

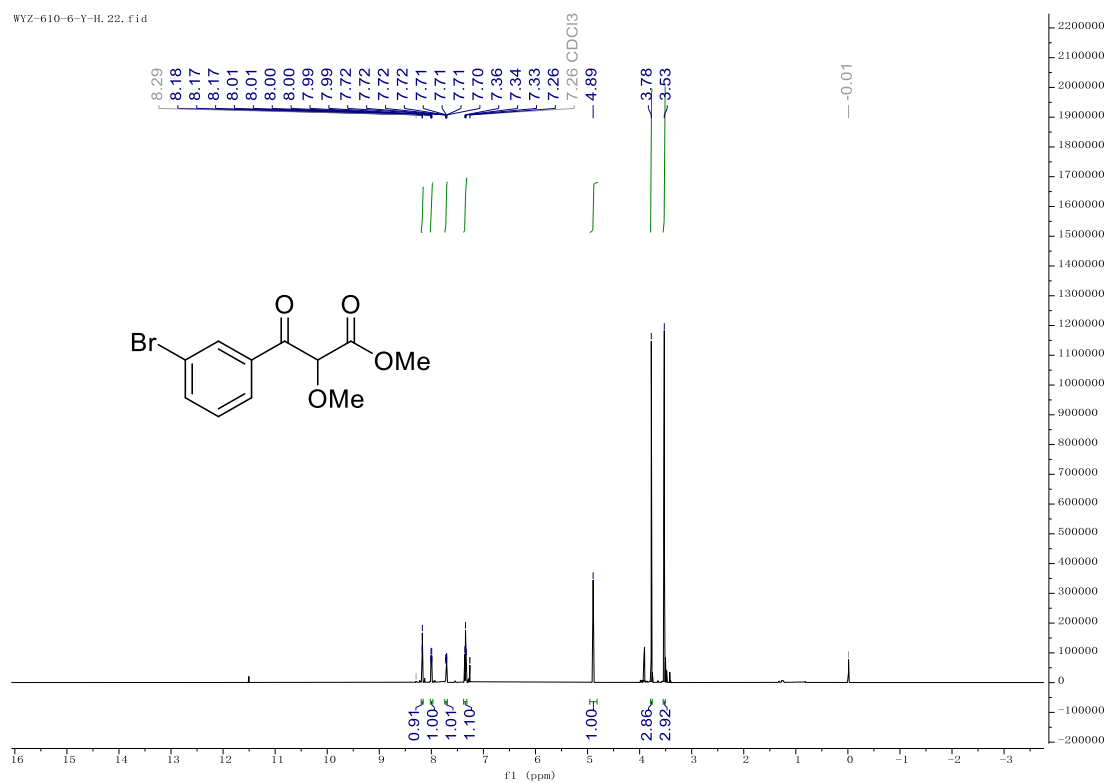

### <sup>13</sup>C NMR spectra (151 MHz, CDCl<sub>3</sub>) of **1m**

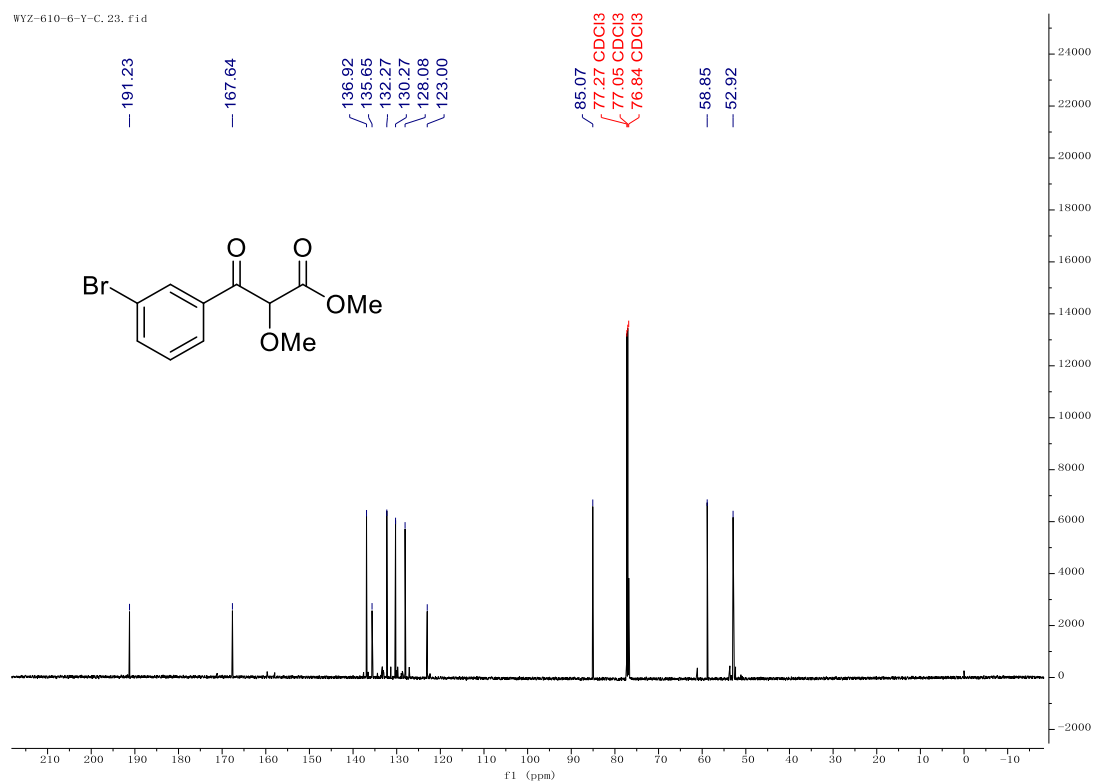

### <sup>1</sup>H NMR spectra (600 MHz, CDCl<sub>3</sub>) of **1n**

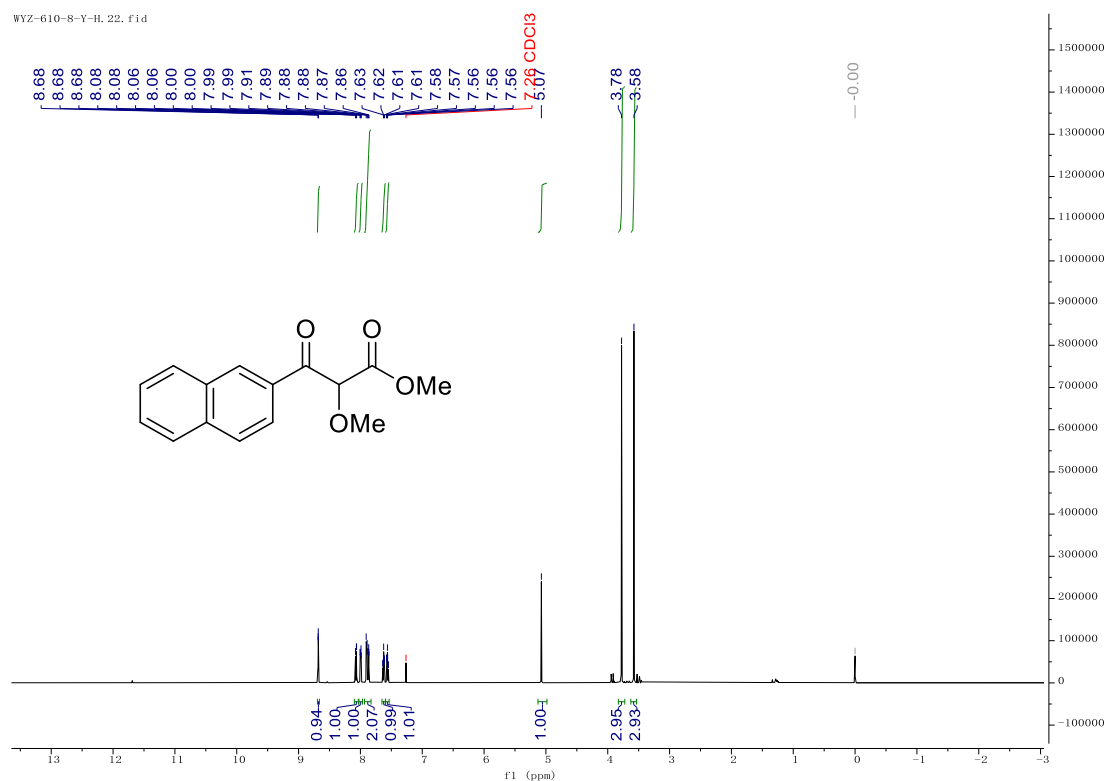

### <sup>13</sup>C NMR spectra (151 MHz, CDCl<sub>3</sub>) of **1n**

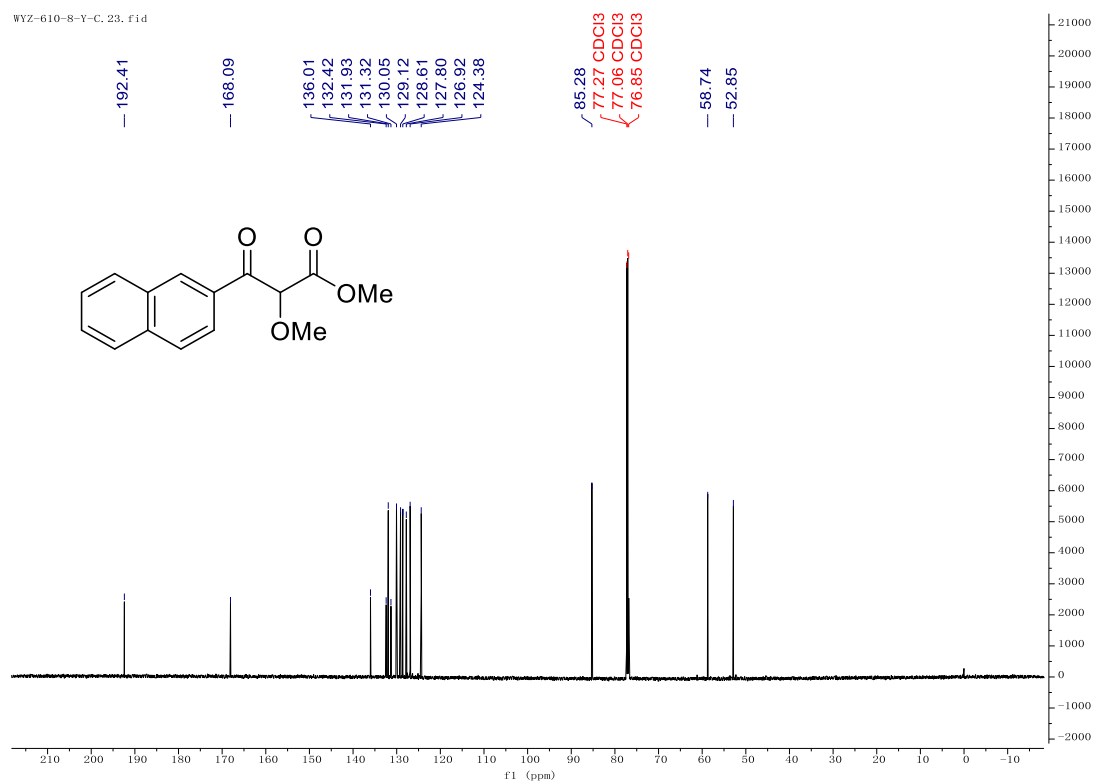

### <sup>1</sup>H NMR spectra (600 MHz, CDCl<sub>3</sub>) of **1o**

WVZ-612-2-Y-H.4.fid

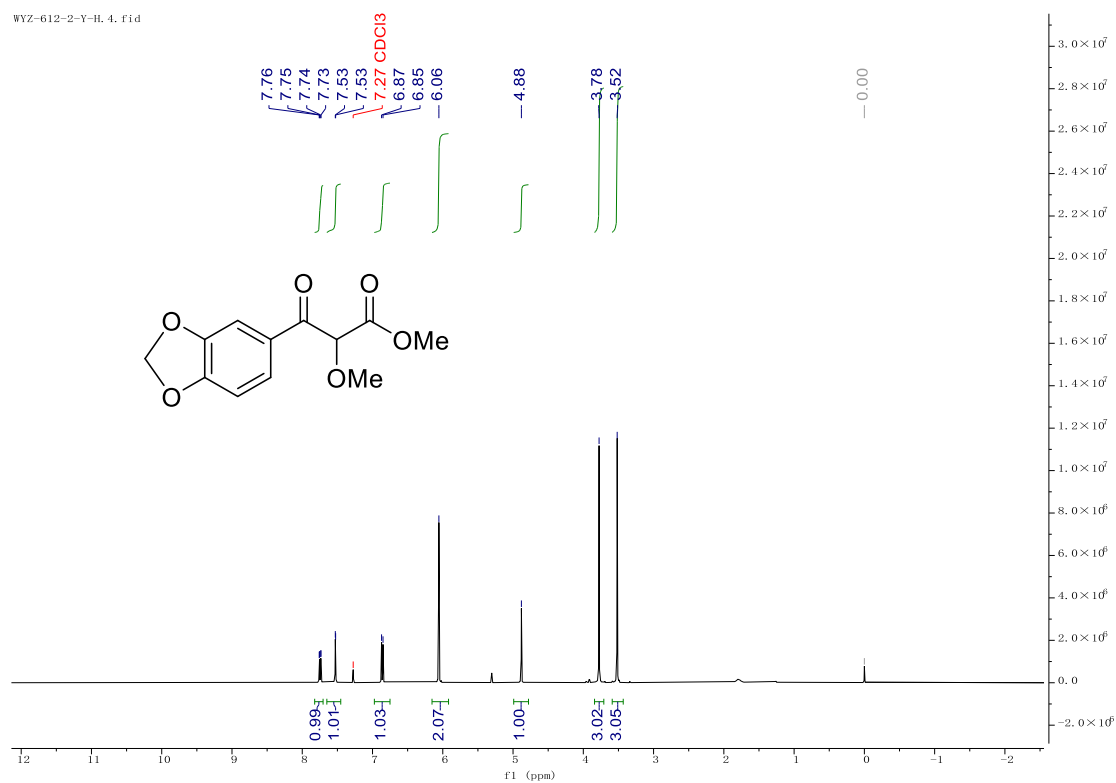

### <sup>13</sup>C NMR spectra (151 MHz, CDCl<sub>3</sub>) of **1o**

WVZ-612-2-Y-C.5.fid

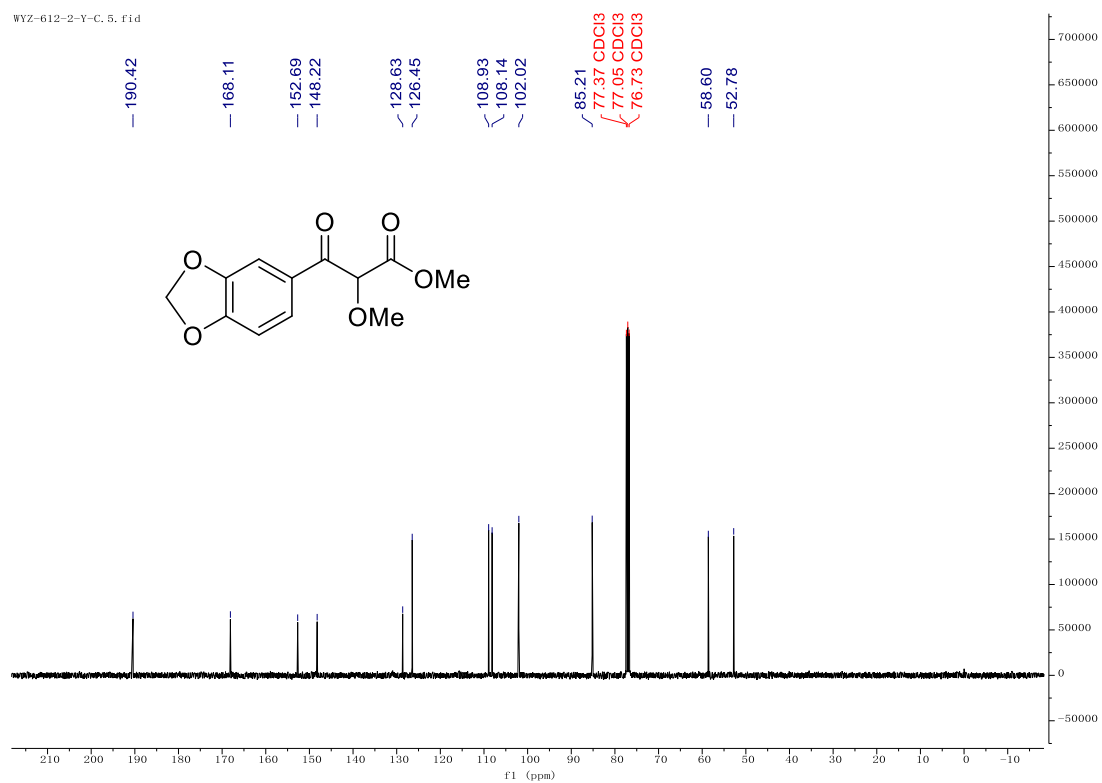

# <sup>1</sup>H NMR spectra (600 MHz, CDCl<sub>3</sub>) of **1p**

WVZ-612-3-Y-H.4.fid

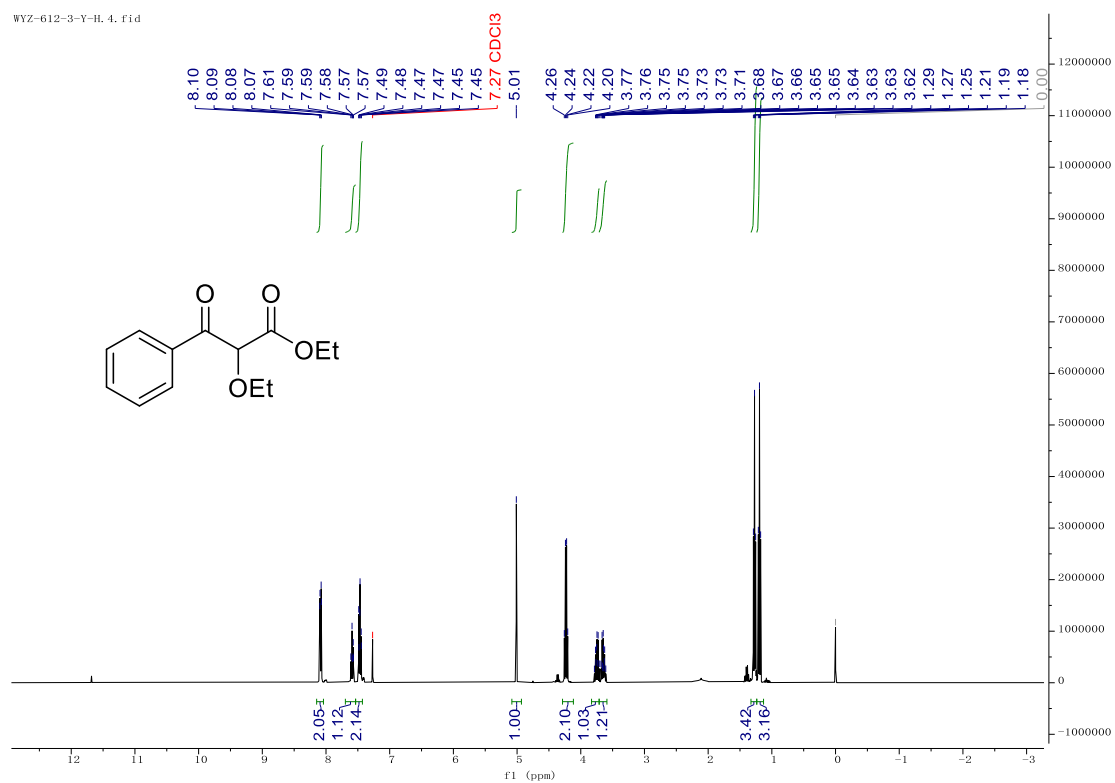

# <sup>13</sup>C NMR spectra (151 MHz, CDCl<sub>3</sub>) of **1p**

WVZ-612-3-Y-C.5.fid

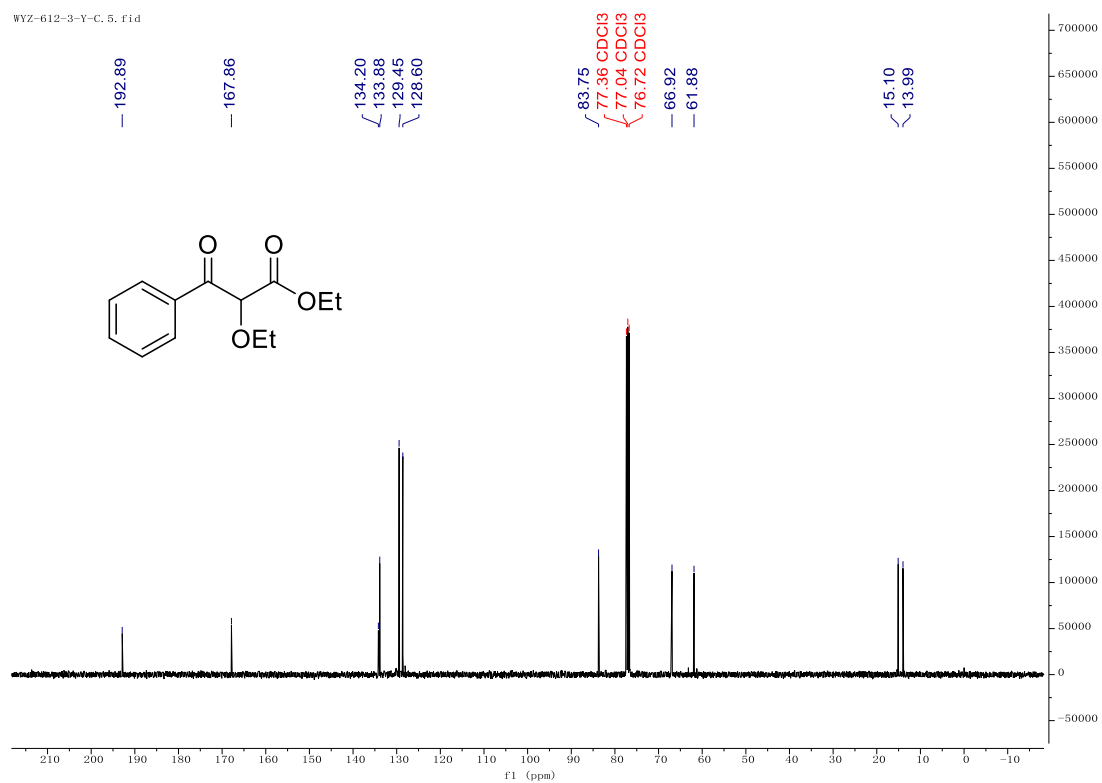

### <sup>1</sup>H NMR spectra (600 MHz, CDCl<sub>3</sub>) of **1q**

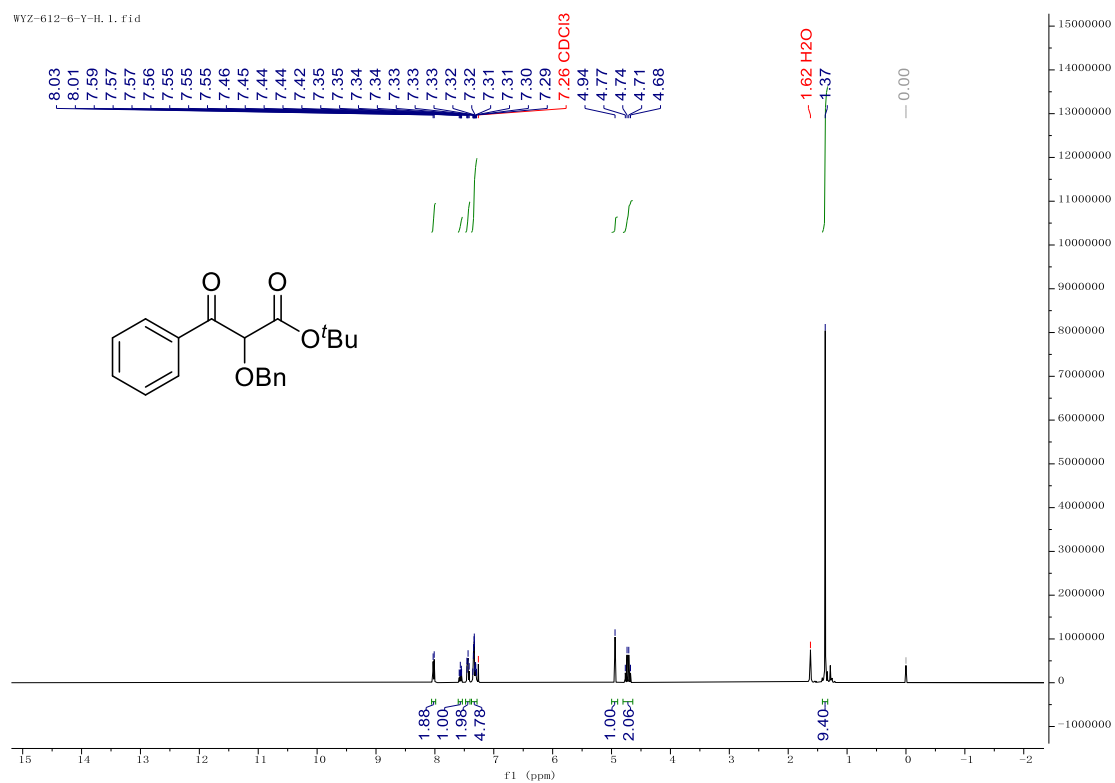

### <sup>13</sup>C NMR spectra (151 MHz, CDCl<sub>3</sub>) of **1q**

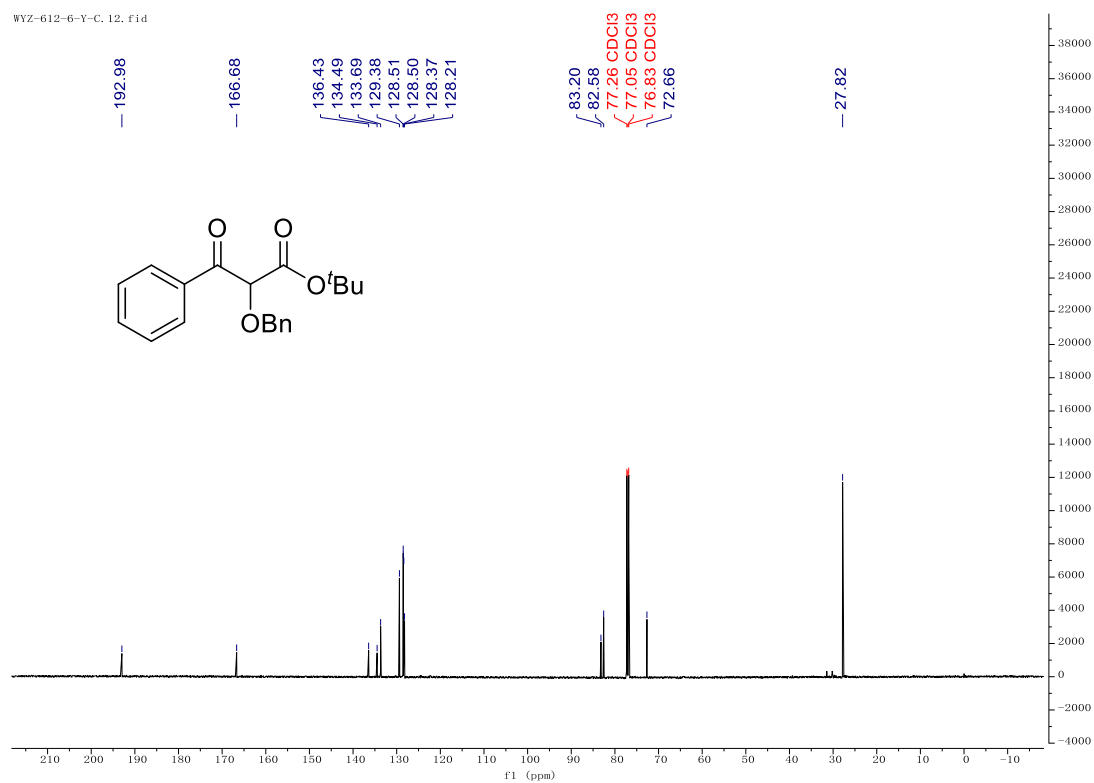

### <sup>1</sup>H NMR spectra (600 MHz, CDCl<sub>3</sub>) of **1r**

WYZ-613-2-2-RE-H, 5, f1.d

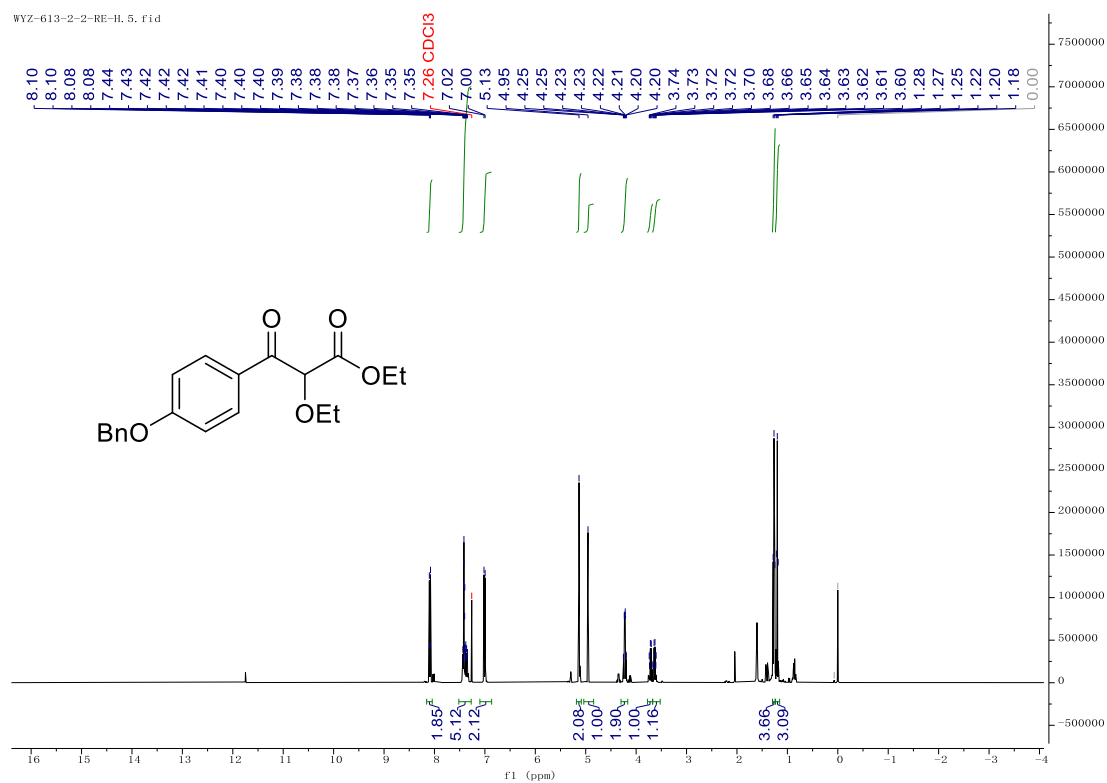

### <sup>13</sup>C NMR spectra (151 MHz, CDCl<sub>3</sub>) of **1r**

WYZ-613-2-2-C, 18, f1.d

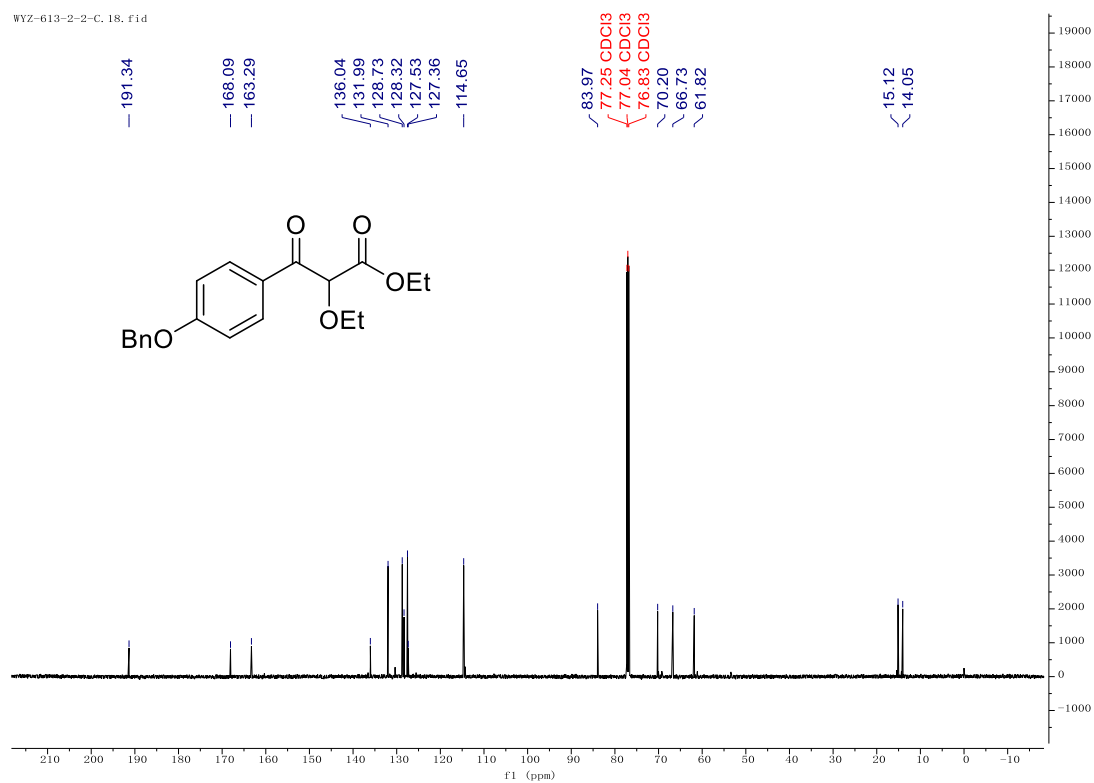

# <sup>1</sup>H NMR spectra (400 MHz, CDCl<sub>3</sub>) of 1s

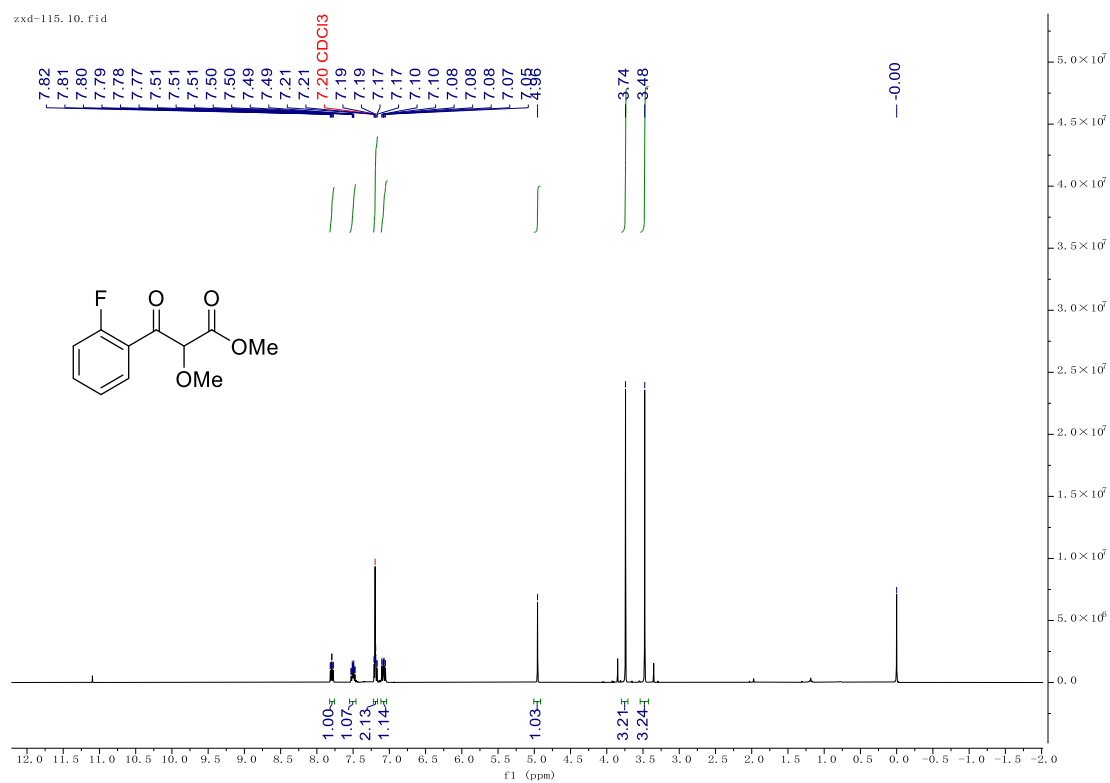

# <sup>13</sup>C NMR spectra (101 MHz, CDCl<sub>3</sub>) of 1s

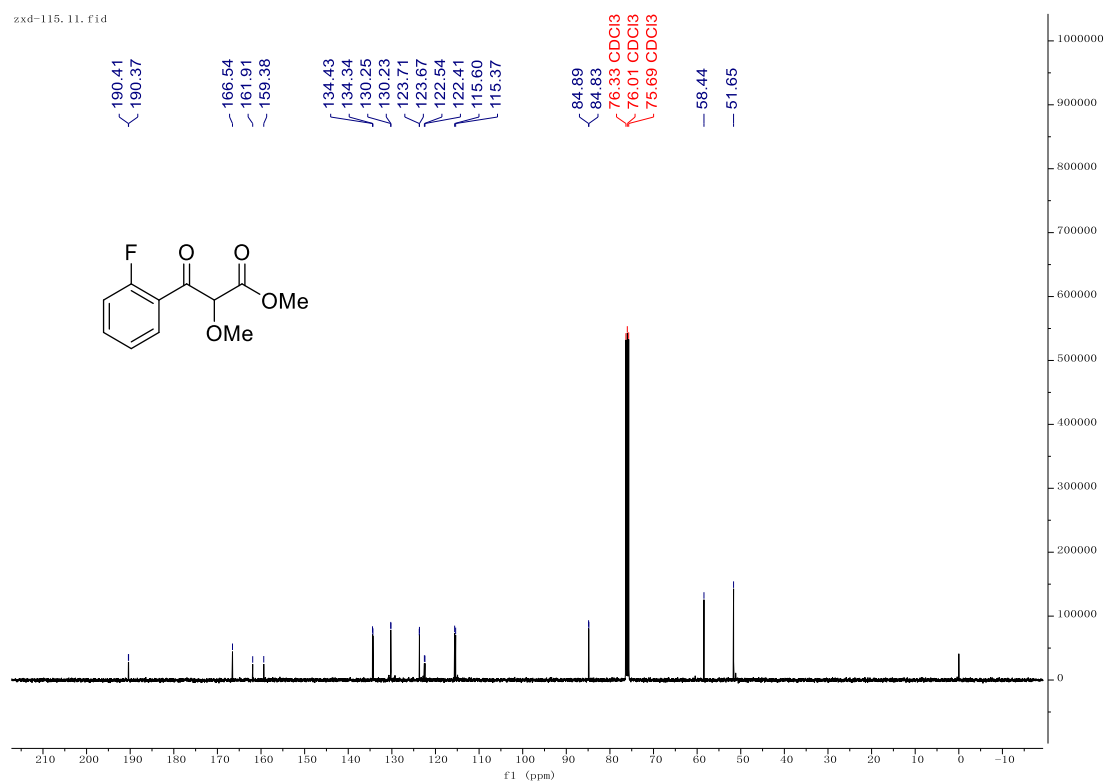



### <sup>19</sup>F NMR spectra (377 MHz, CDCl<sub>3</sub>) of **1s**

zxd-115\_12.fid

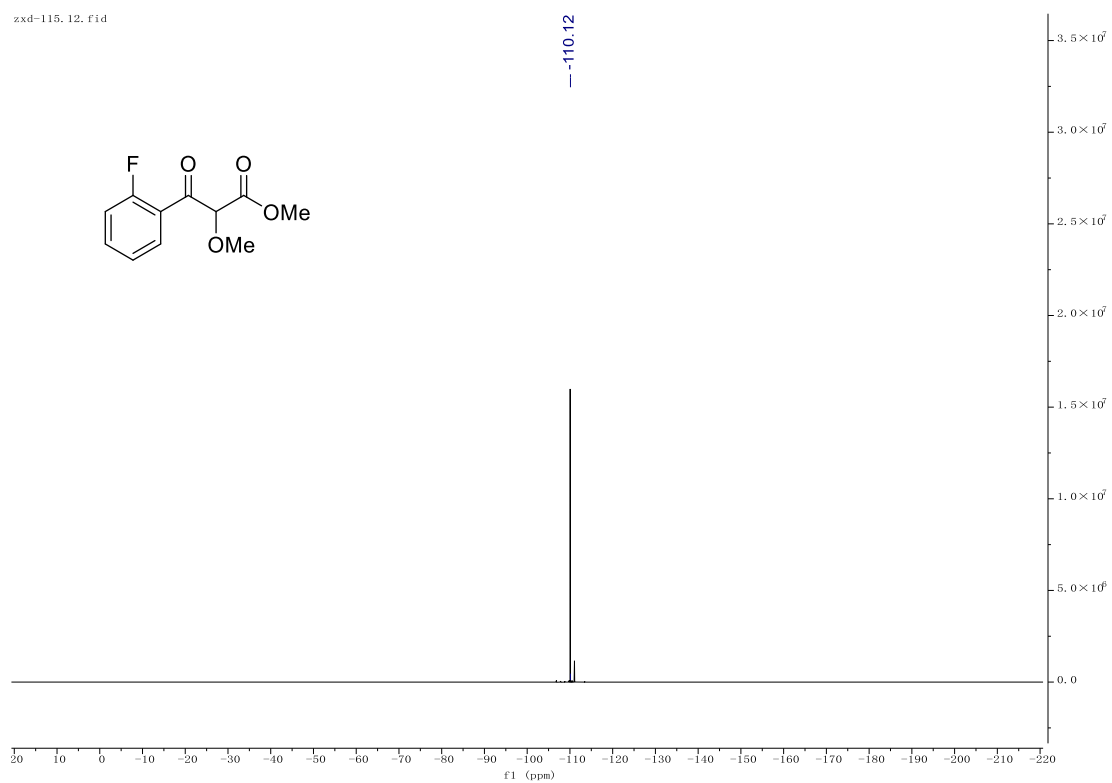

### <sup>1</sup>H NMR spectra (400 MHz, CDCl<sub>3</sub>) of **2a**

WYZ-609-1-H.33.fid

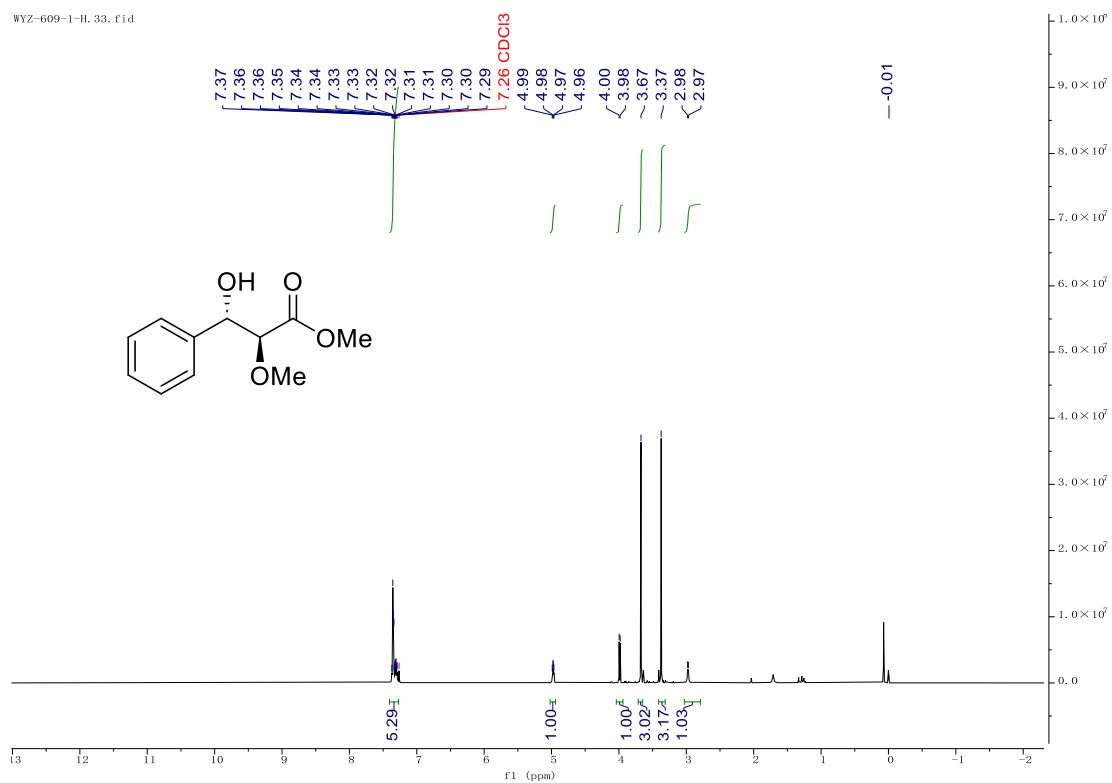

### <sup>13</sup>C NMR spectra (101 MHz, CDCl<sub>3</sub>) of **2a**

WYZ-609-1-C.35.fid

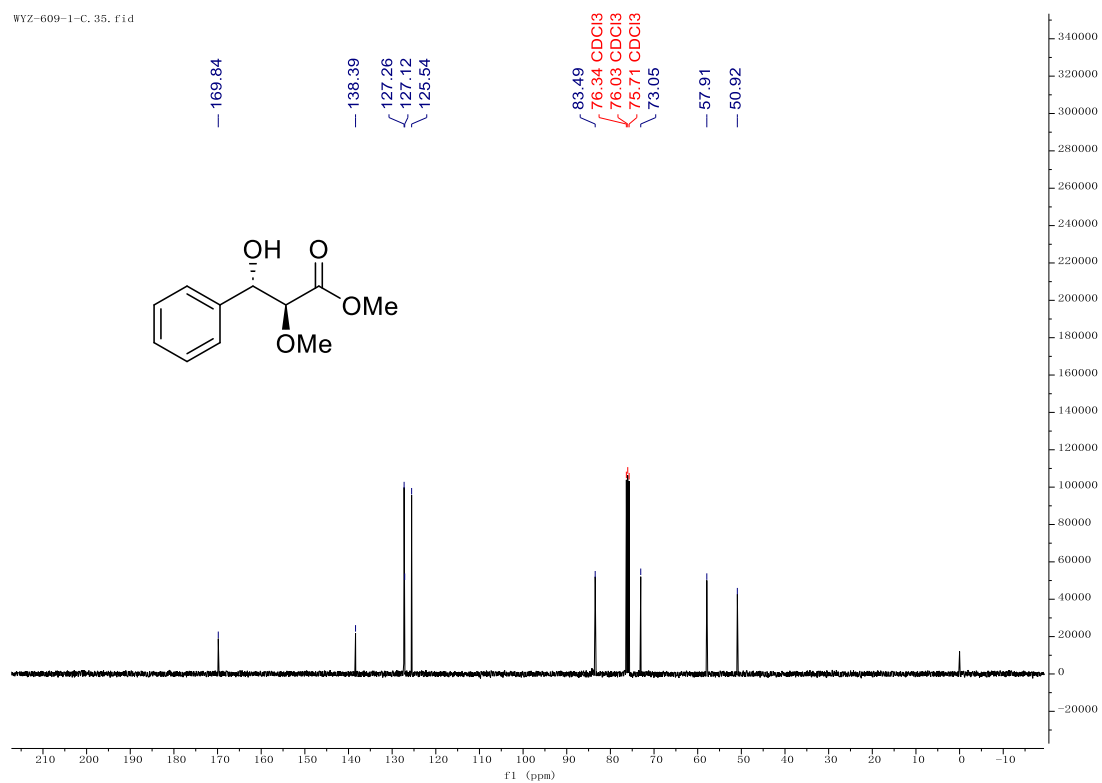

### <sup>1</sup>H NMR spectra (400 MHz, CDCl<sub>3</sub>) of **2b**

WYZ-609-6-H.42.fid

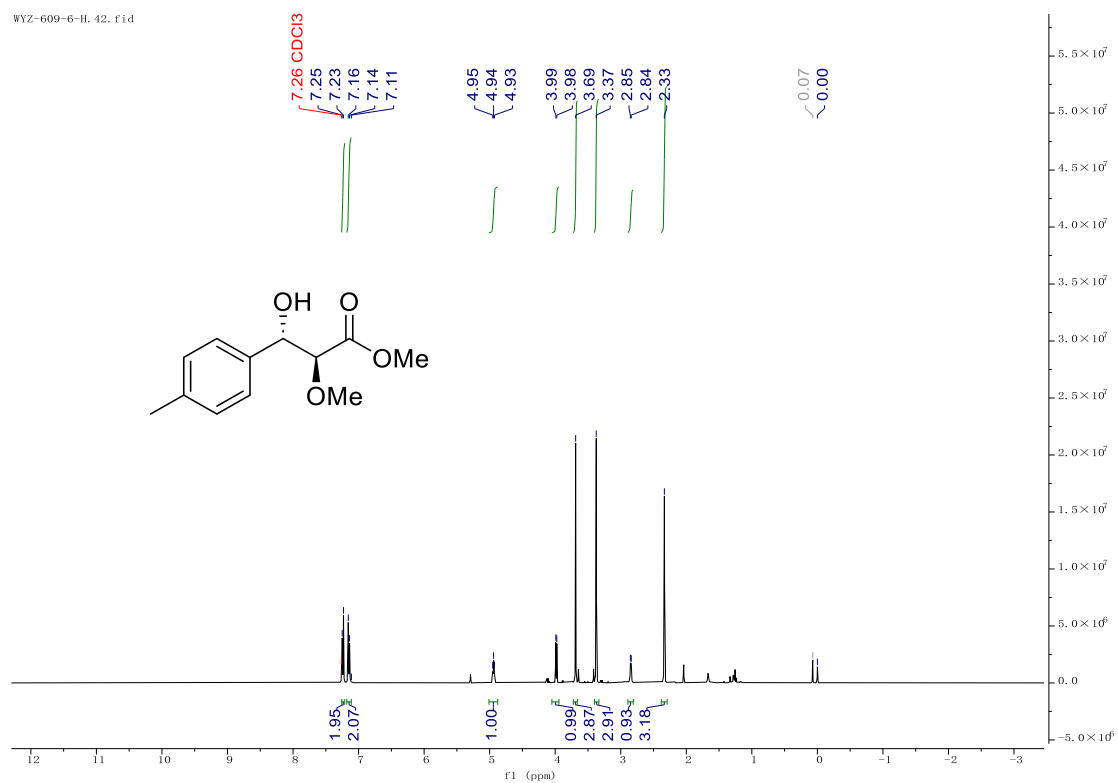

### <sup>13</sup>C NMR spectra (101 MHz, CDCl<sub>3</sub>) of **2b**

WYZ-609-6-C\_43.fid

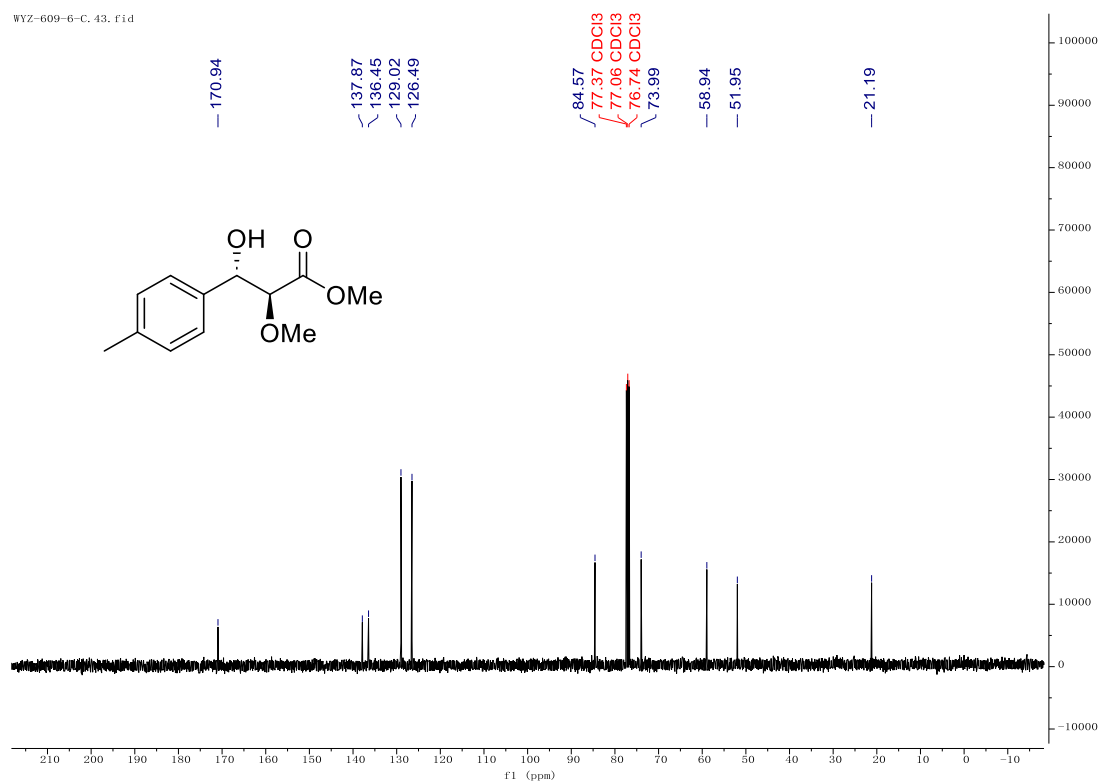

### <sup>1</sup>H NMR spectra (400 MHz, CDCl<sub>3</sub>) of **2c**

WYZ-610-1-H\_12.fid

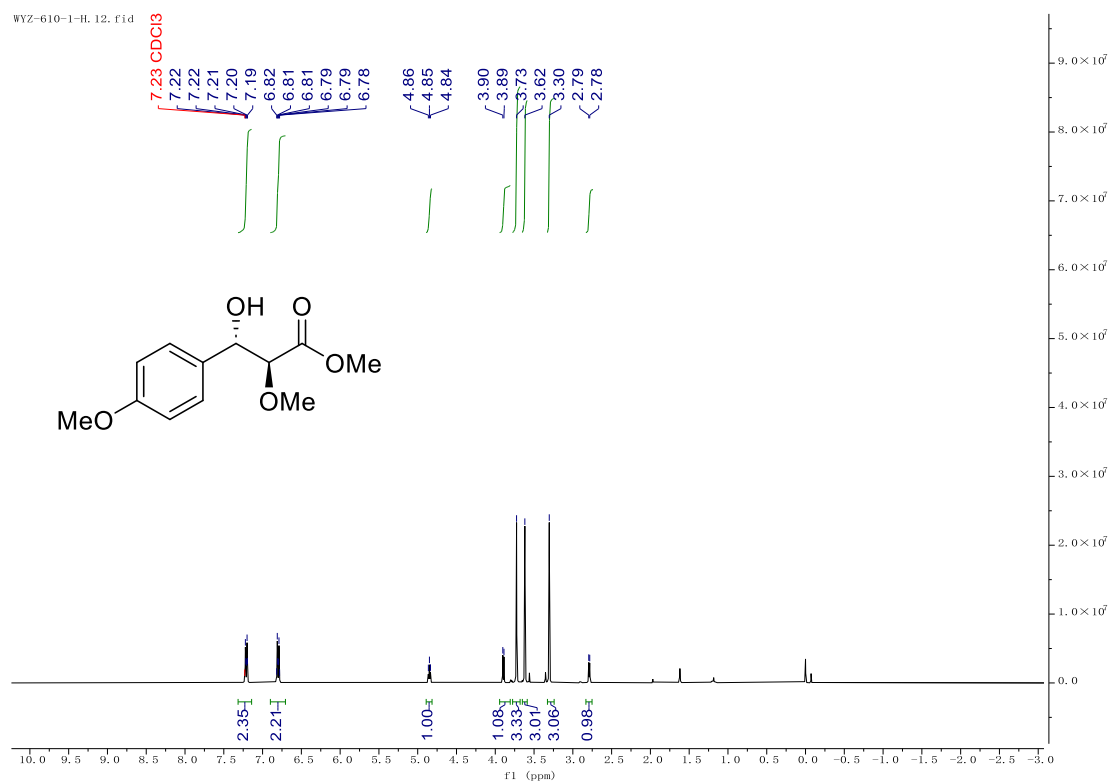

### <sup>13</sup>C NMR spectra (101 MHz, CDCl<sub>3</sub>) of 2c

WYZ-610-1-C. 13. f1d

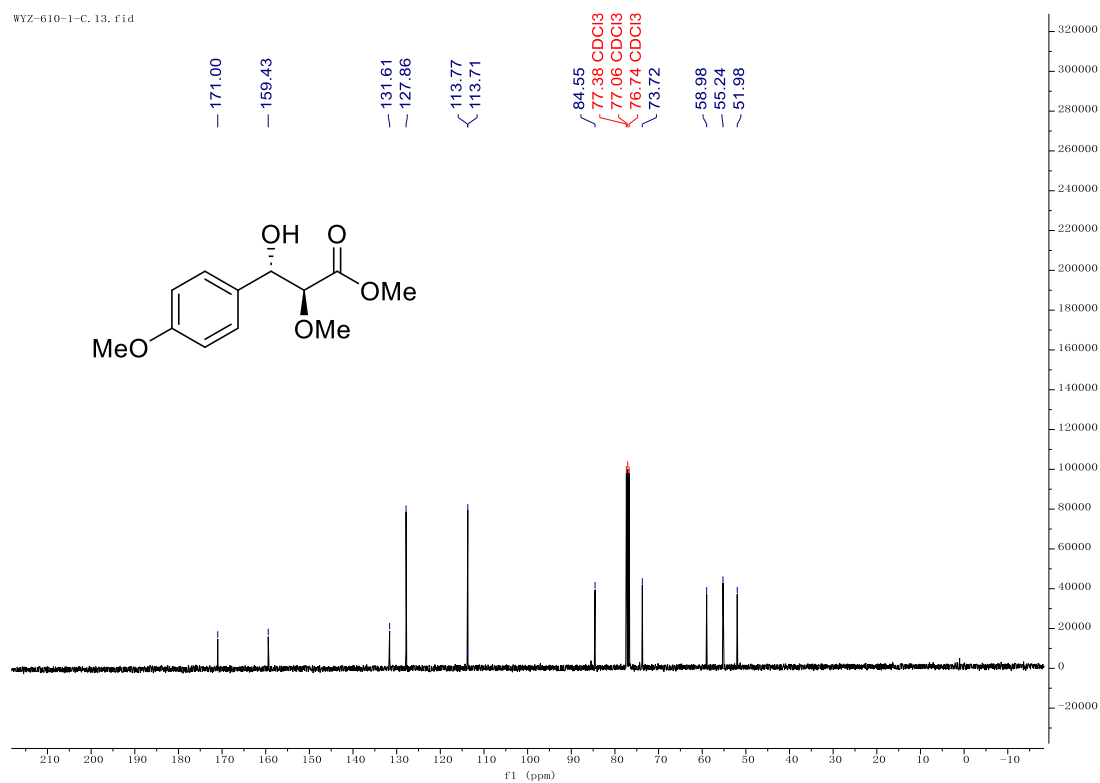

### <sup>1</sup>H NMR spectra (400 MHz, CDCl<sub>3</sub>) of 2d

WYZ-610-2-AH-H. 1. f1d

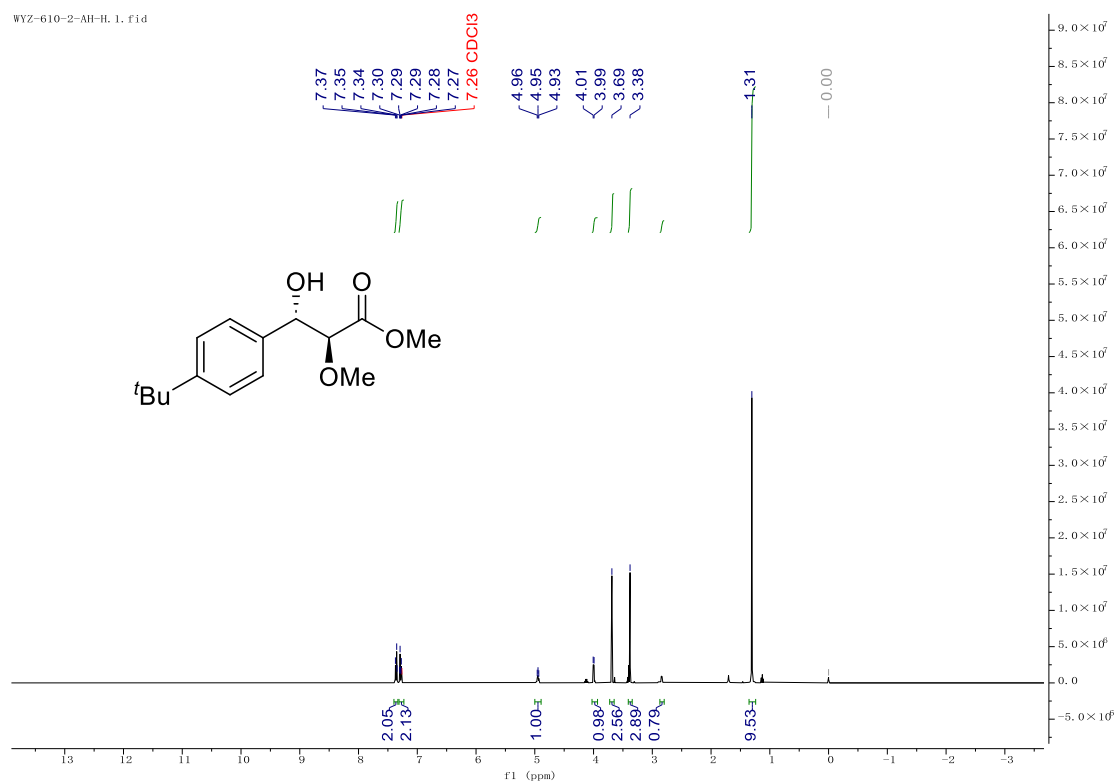

<sup>13</sup>C NMR spectra (101 MHz, CDCl<sub>3</sub>) of **2d**

WYZ-610-2-AH-C. 3. f1.d

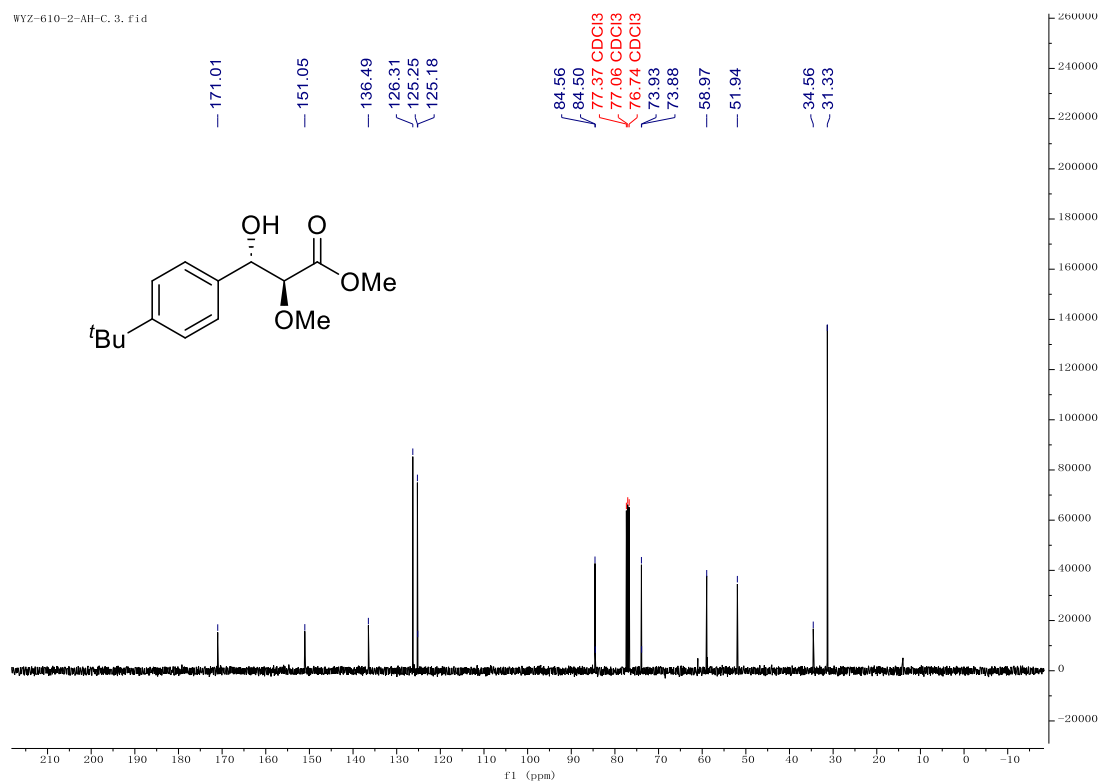

<sup>1</sup>H NMR spectra (400 MHz, CDCl<sub>3</sub>) of **2e**

WYZ-609-5-H. 42. f1.d

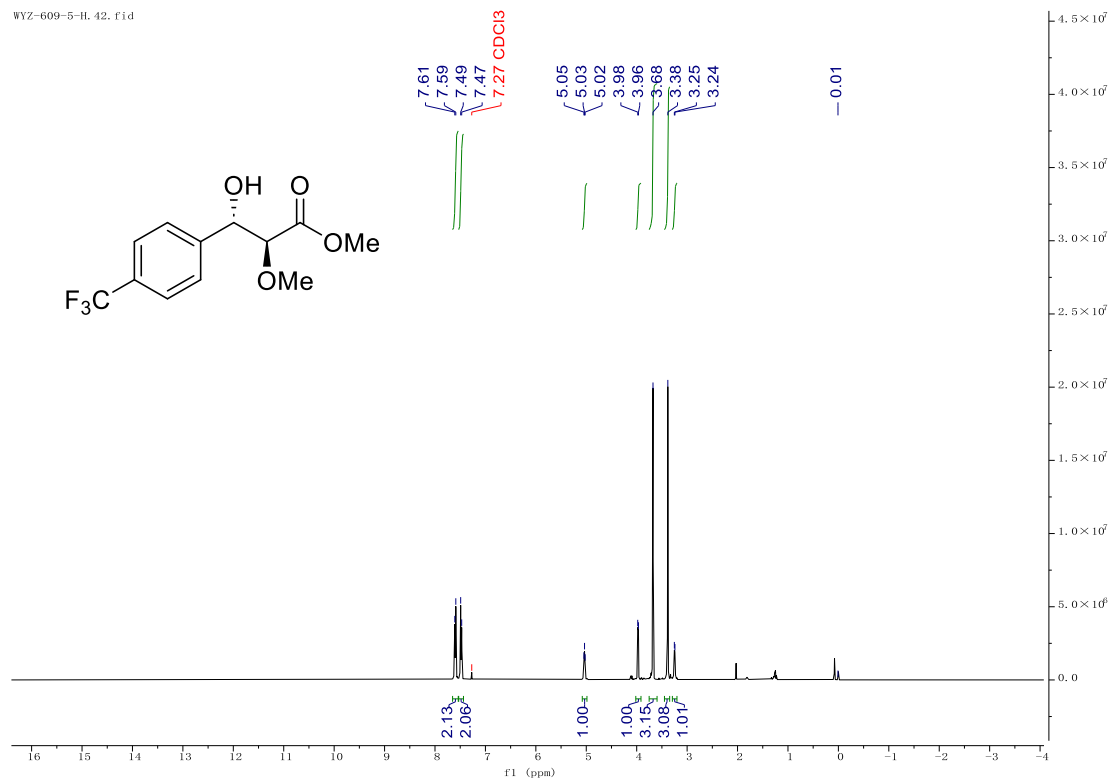

### <sup>13</sup>C NMR spectra (101 MHz, CDCl<sub>3</sub>) of **2e**

WYZ-609-5-C\_43.fid

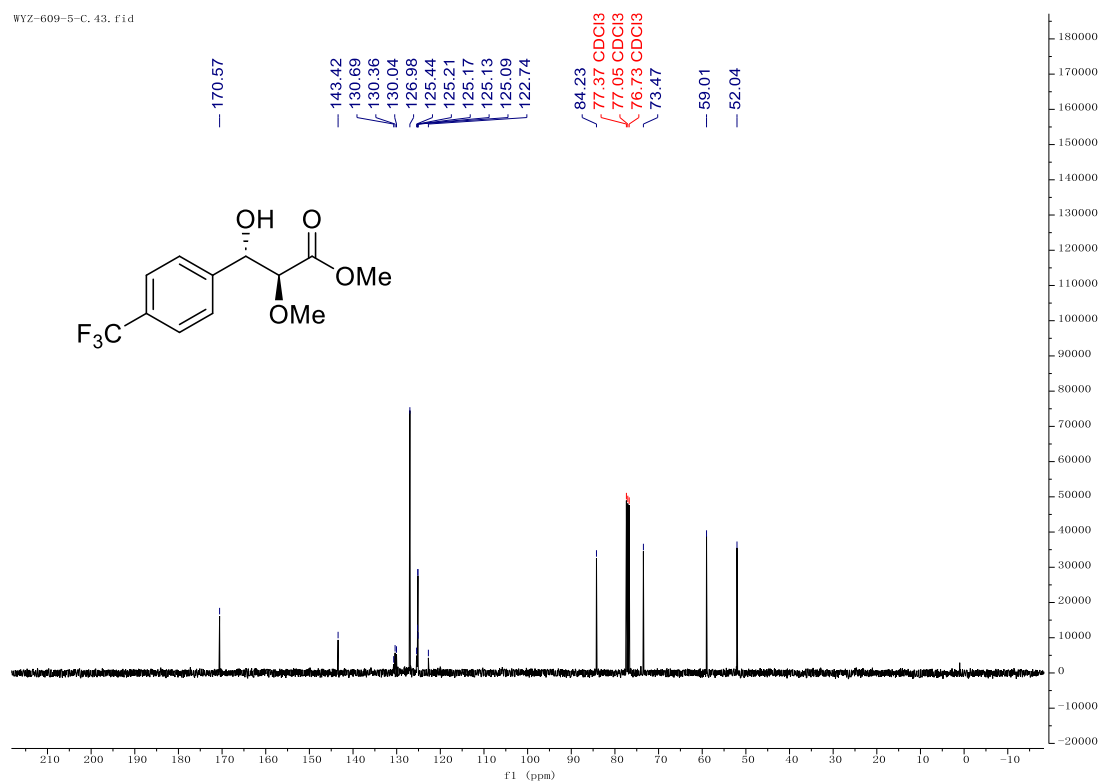

### <sup>19</sup>F NMR spectra (376 MHz, CDCl<sub>3</sub>) of **2e**

WYZ-609-5-F\_45.fid

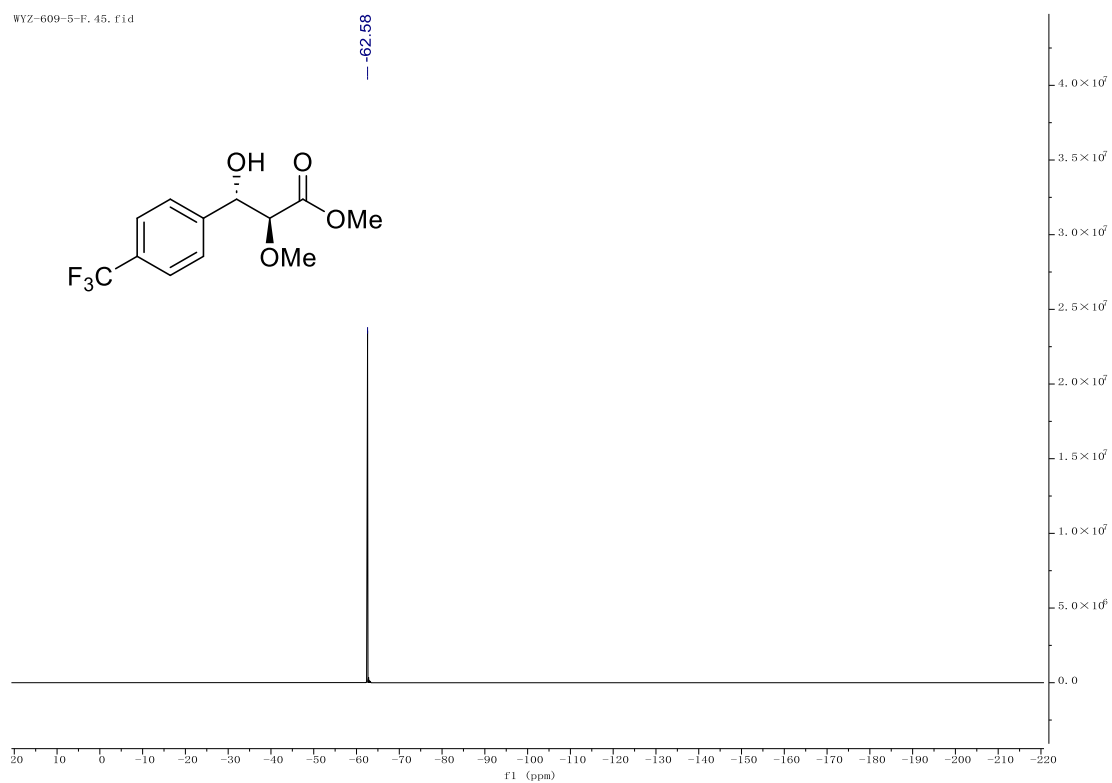

# <sup>1</sup>H NMR spectra (400 MHz, CDCl<sub>3</sub>) of 2f

WYZ-609-2-H, 42, f1.d

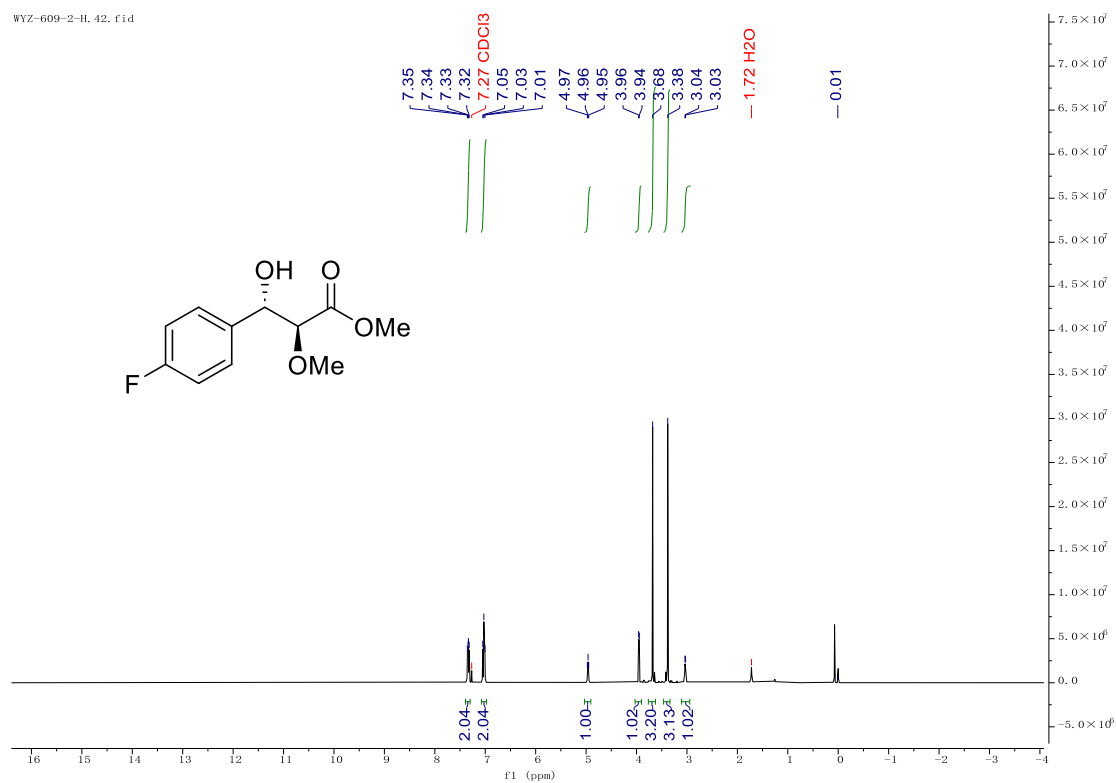

# <sup>13</sup>C NMR spectra (101 MHz, CDCl<sub>3</sub>) of 2f

WYZ-609-2-C, 43, f1.d

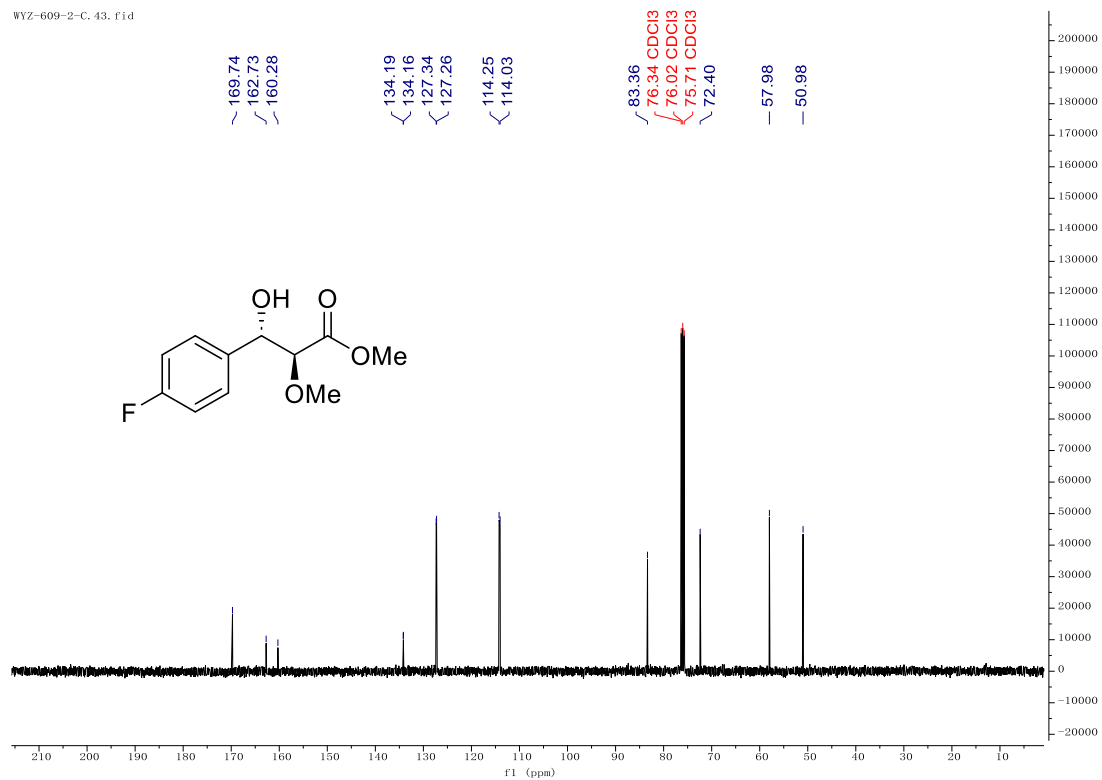

### <sup>19</sup>F NMR spectra (376 MHz, CDCl<sub>3</sub>) of **2f**

WYZ-609-2-F, 1. f1d

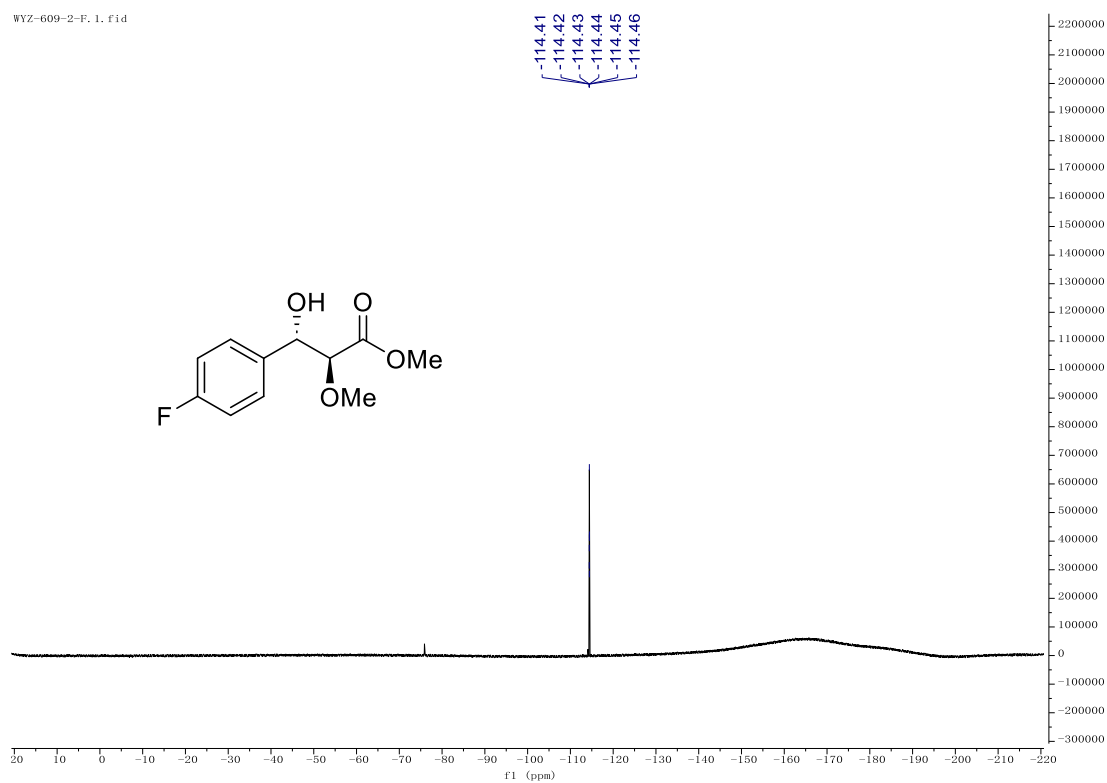

### <sup>1</sup>H NMR spectra (400 MHz, CDCl<sub>3</sub>) of **2g**

WYZ-609-3-RE-H, 1. f1d

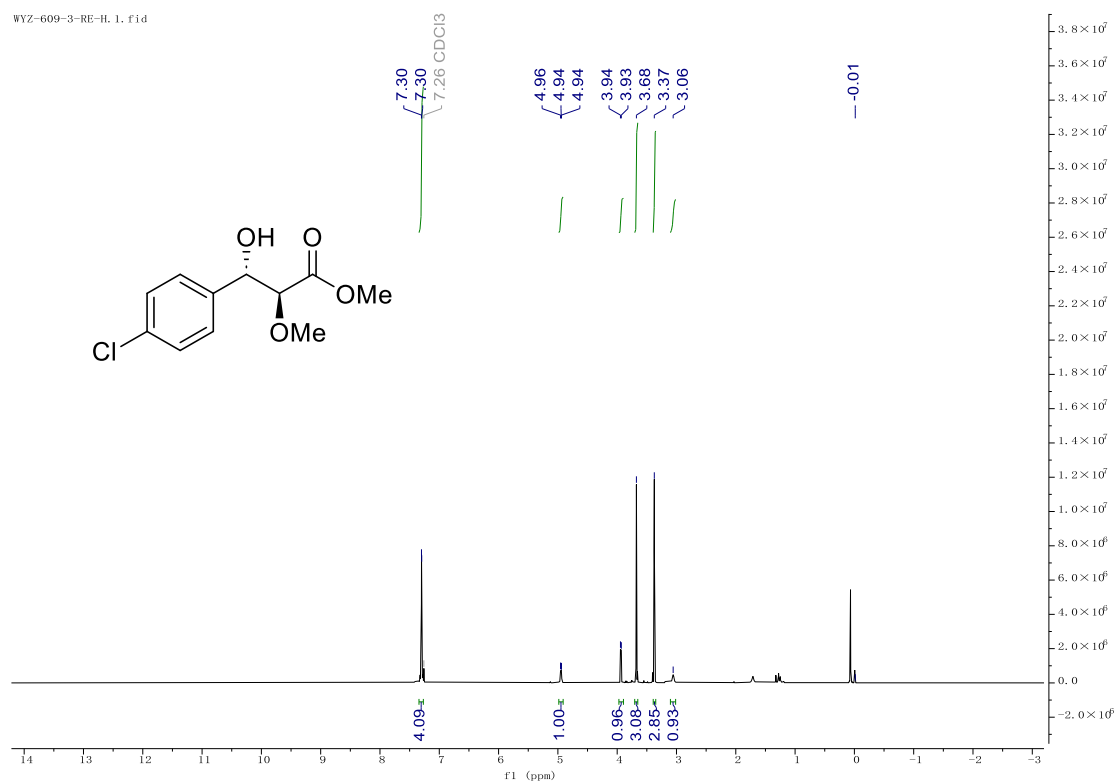



### <sup>13</sup>C NMR spectra (101 MHz, CDCl<sub>3</sub>) of **2g**

WYZ-609-3-RE-C. 3. f1.d

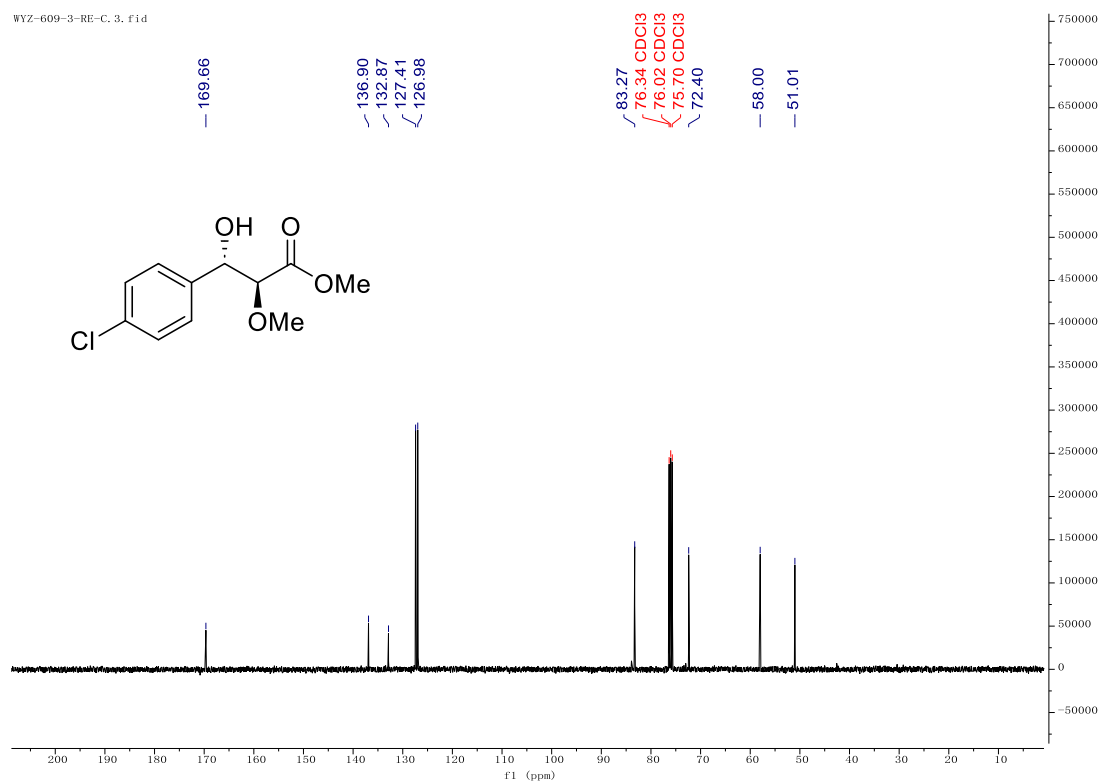

### <sup>1</sup>H NMR spectra (400 MHz, CDCl<sub>3</sub>) of **2h**

WYZ-609-4-H. 42. f1.d

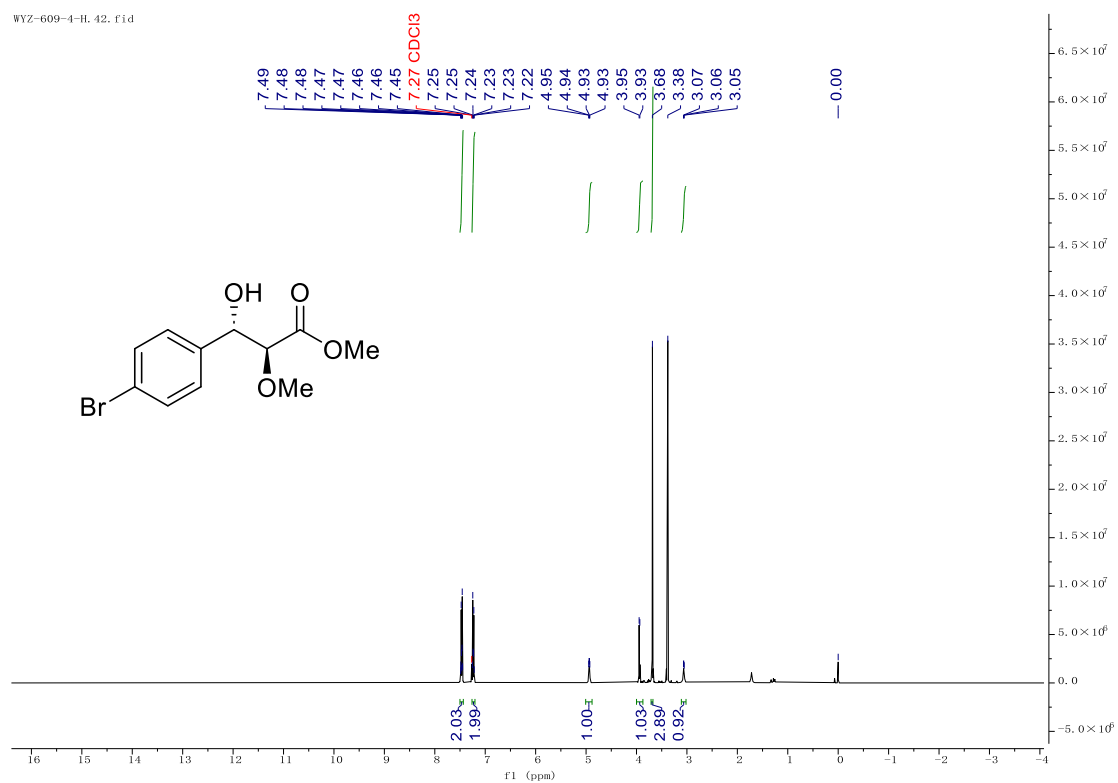

<sup>13</sup>C NMR spectra (101 MHz, CDCl<sub>3</sub>) of **2h**

WYZ-609-4-C\_43.fid

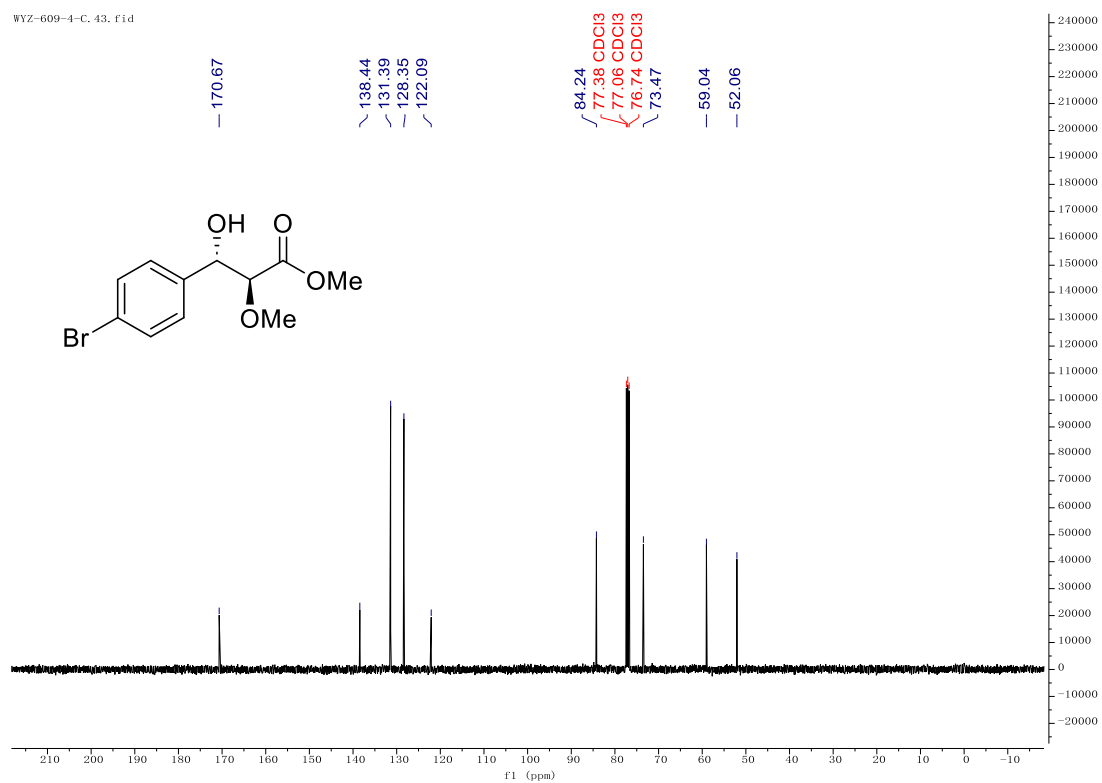

<sup>1</sup>H NMR spectra (400 MHz, CDCl<sub>3</sub>) of **2i**

WYZ-610-3-H\_32.fid

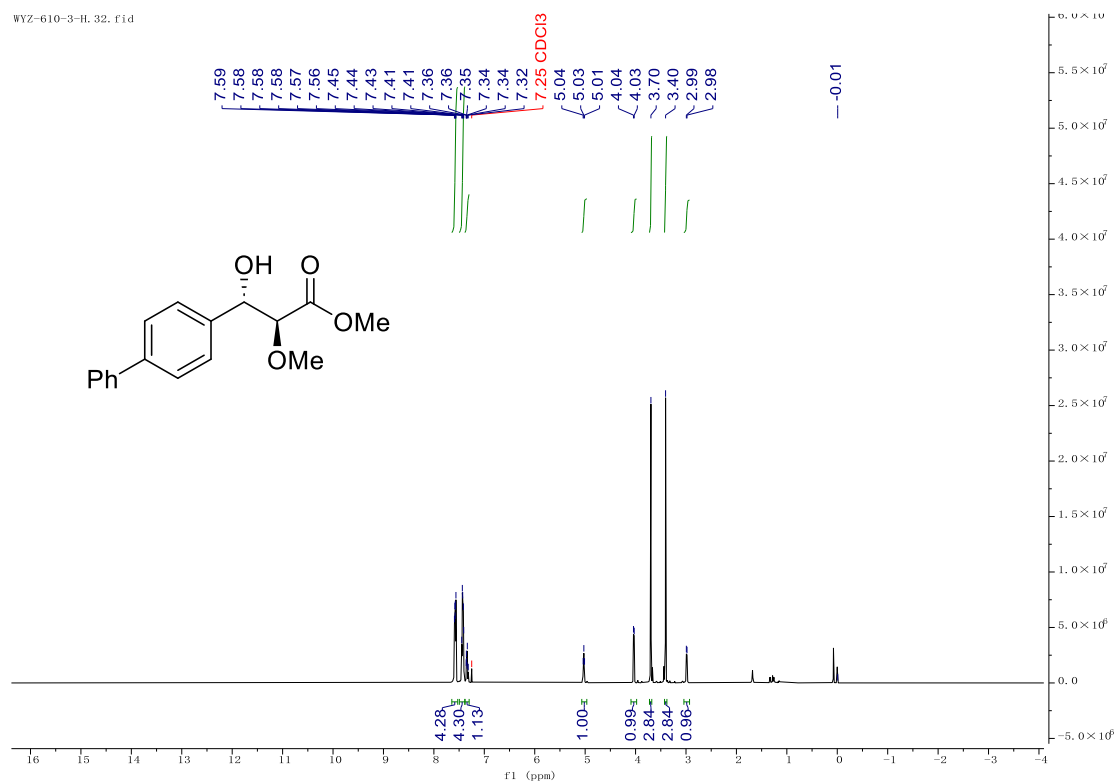

<sup>13</sup>C NMR spectra (101 MHz, CDCl<sub>3</sub>) of **2i**

WYZ-610-3-C. 33. f1d

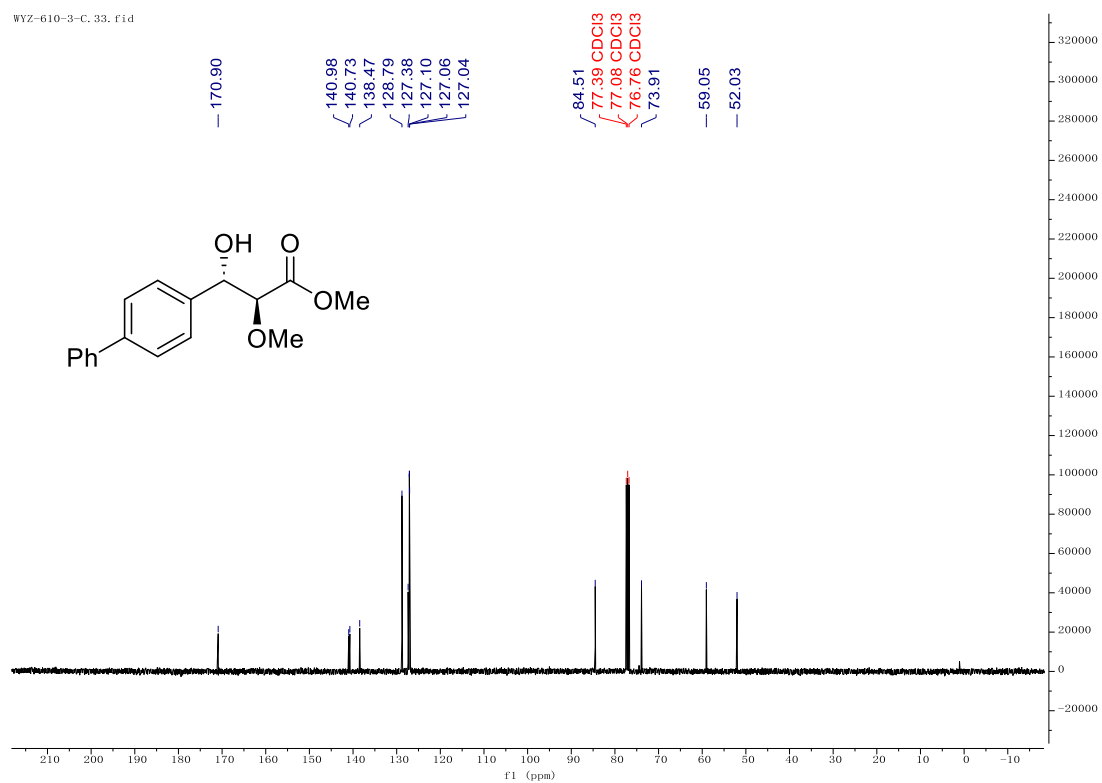

<sup>1</sup>H NMR spectra (400 MHz, CDCl<sub>3</sub>) of **2j**

WYZ-612-4-H. 4. f1d

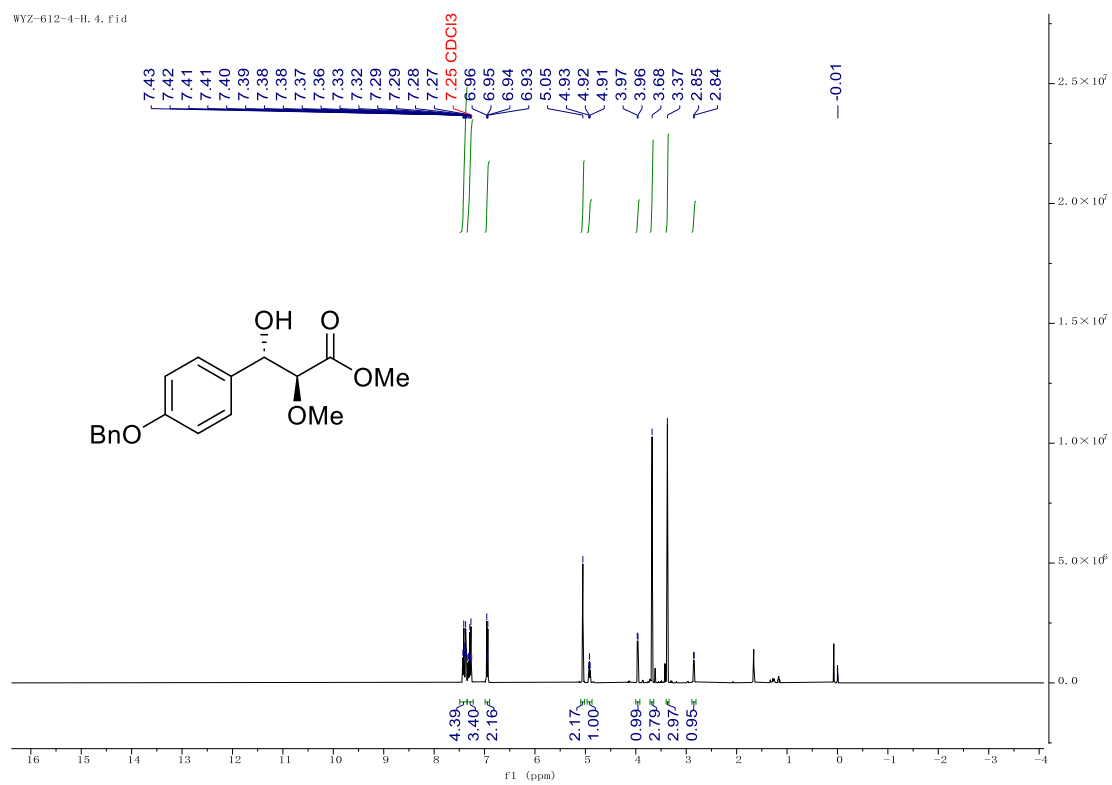

### <sup>13</sup>C NMR spectra (101 MHz, CDCl<sub>3</sub>) of 2j

WYZ-612-4-C. 6. fid

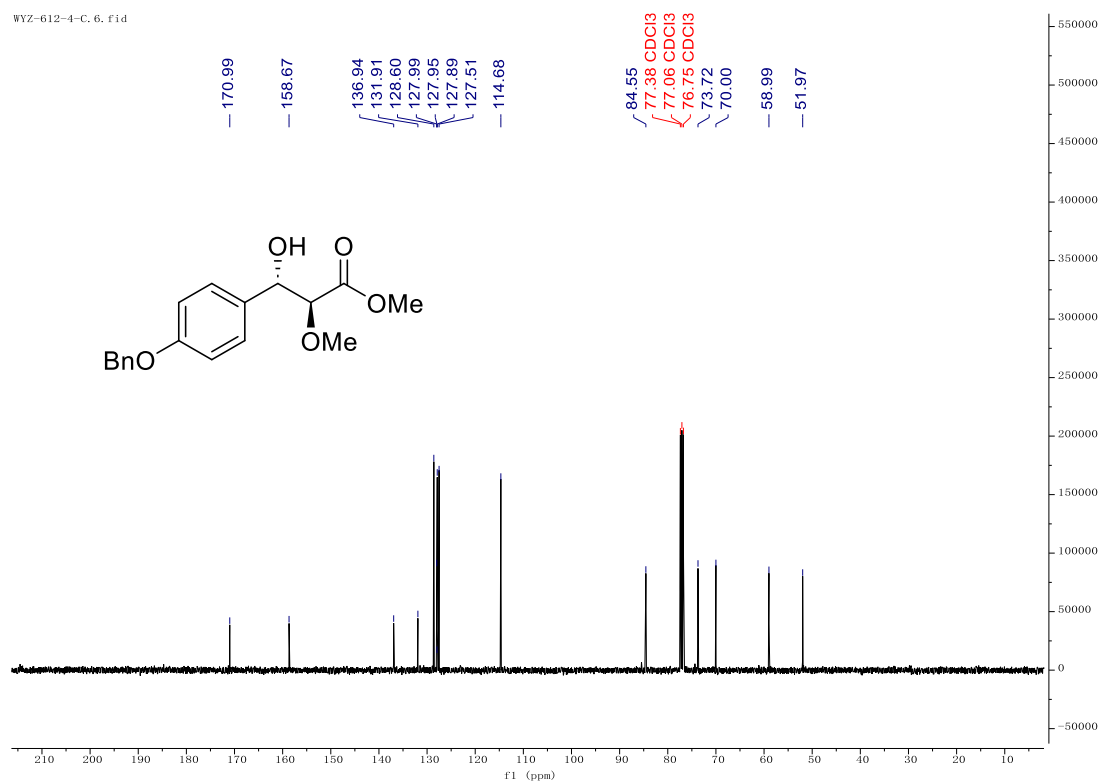

### <sup>1</sup>H NMR spectra (400 MHz, CDCl<sub>3</sub>) of 2k

WYZ-510-4-RE3-H. 5. fid

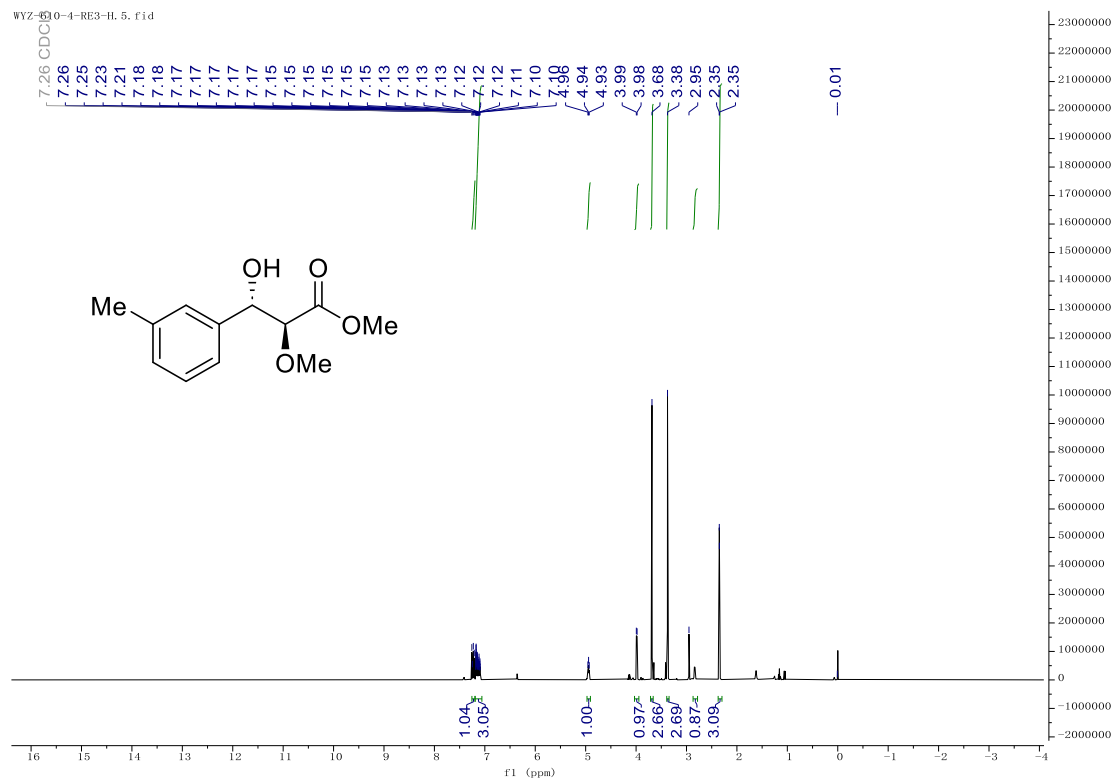

<sup>13</sup>C NMR spectra (101 MHz, CDCl<sub>3</sub>) of **2k**

WYZ-610-4-RE-C. 18. F1d

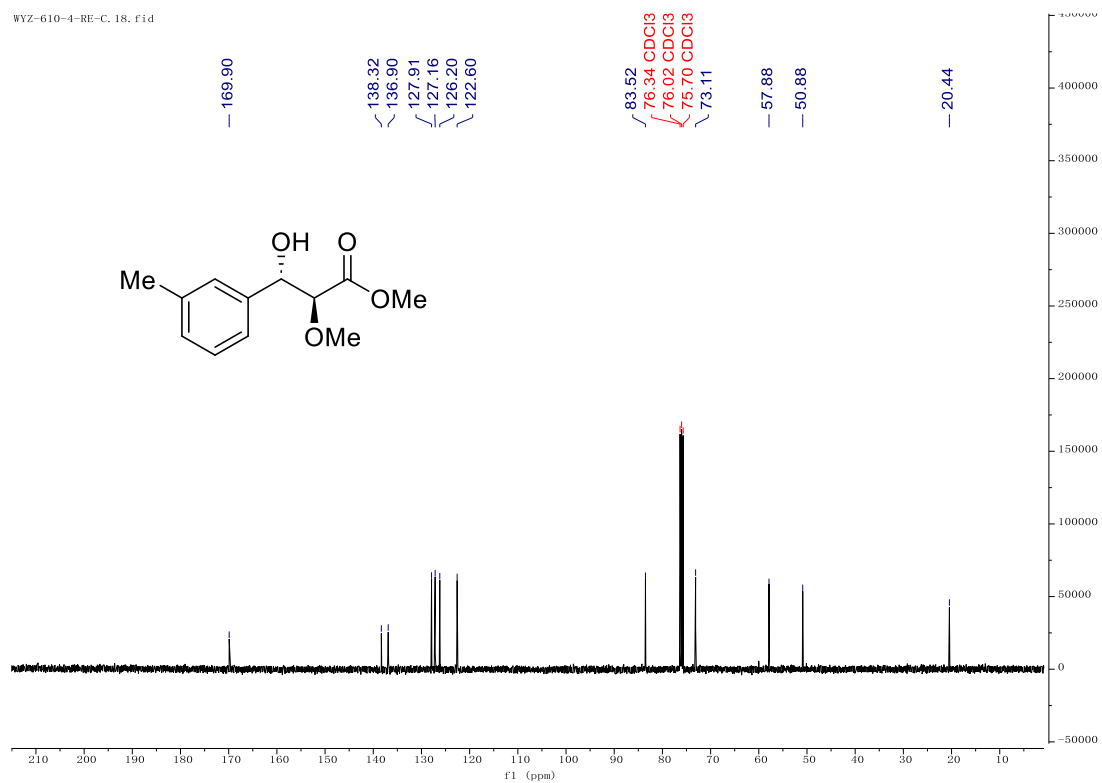

<sup>1</sup>H NMR spectra (400 MHz, CDCl<sub>3</sub>) of **2l**

WYZ-610-5-RE-H. 17. F1d

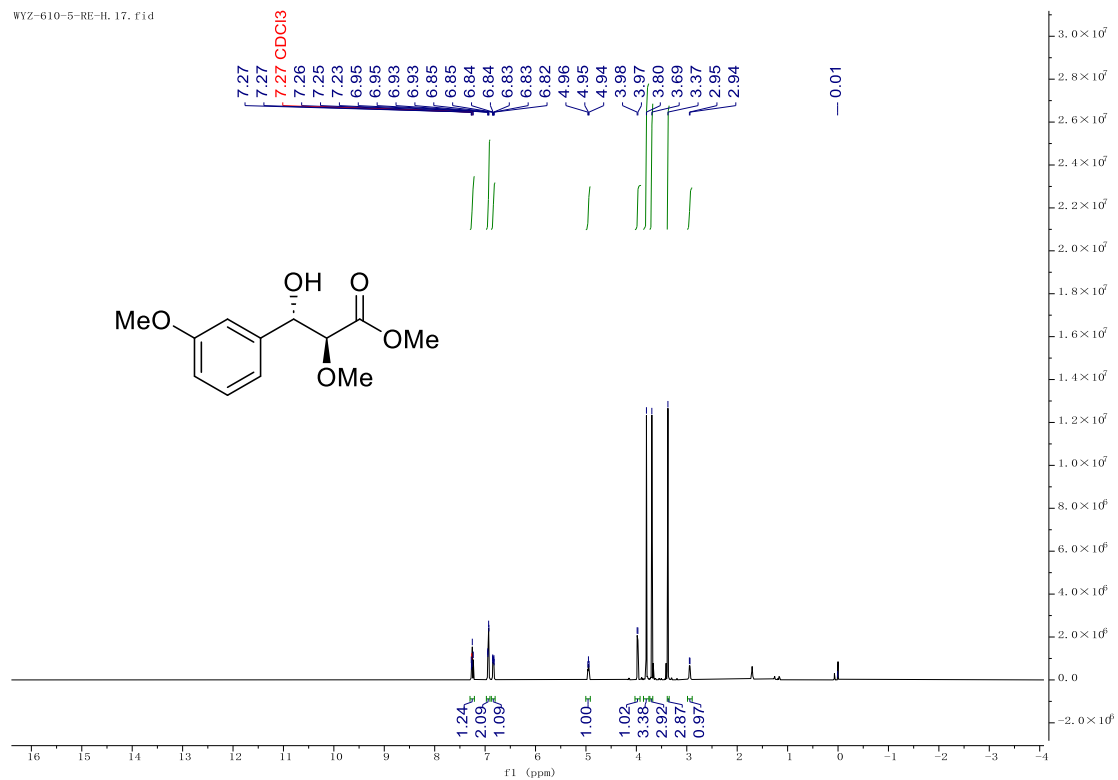

<sup>13</sup>C NMR spectra (101 MHz, CDCl<sub>3</sub>) of **2l**

WYZ-610-5-RE-C. 18. f1d

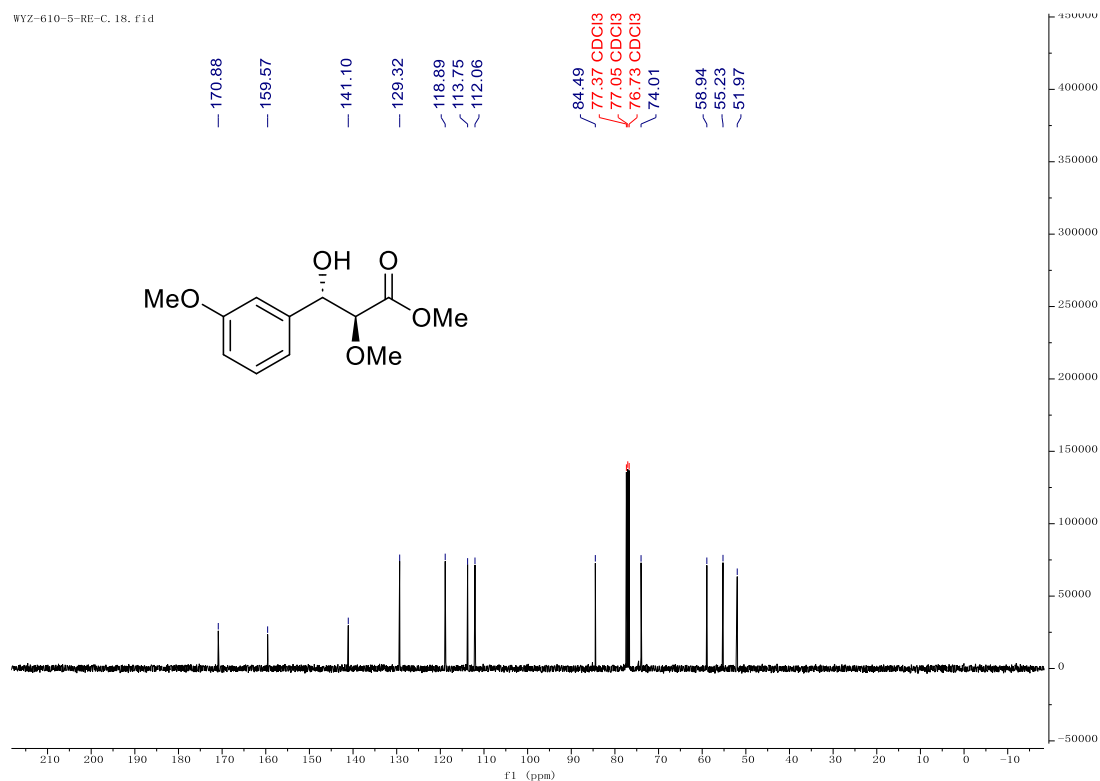

<sup>1</sup>H NMR spectra (400 MHz, CDCl<sub>3</sub>) of **2m**

WYZ-610-6-RE3-H. 1. f1d

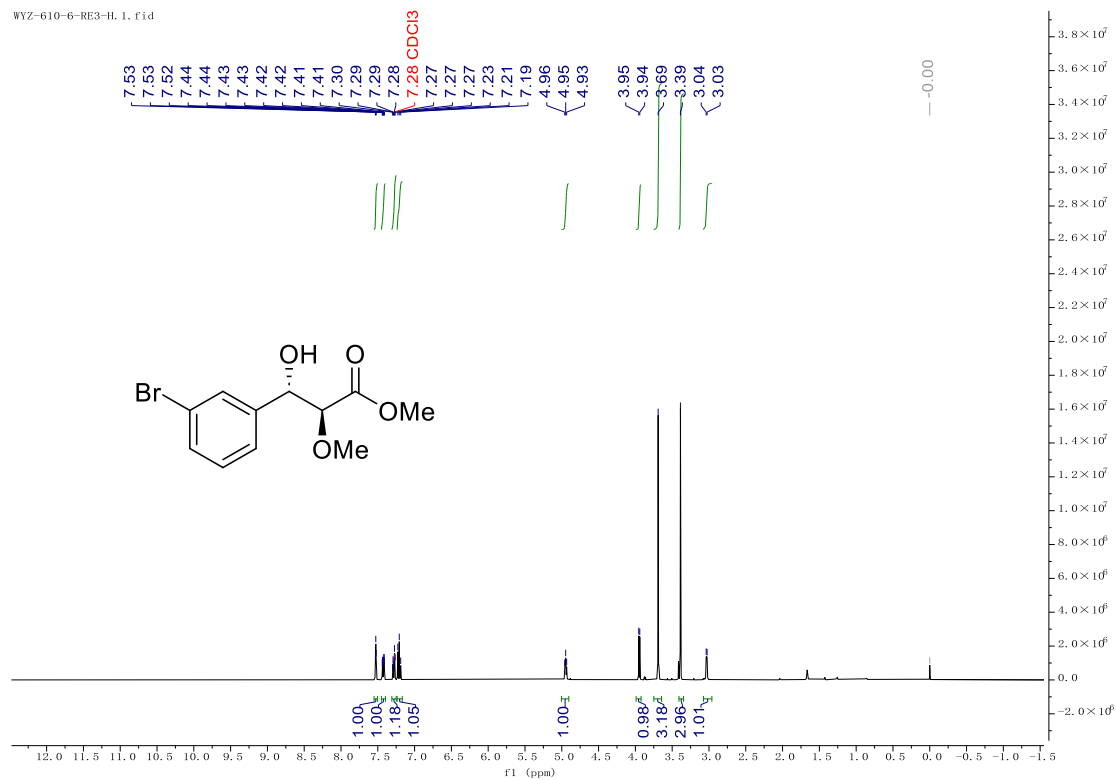

### <sup>13</sup>C NMR spectra (101 MHz, CDCl<sub>3</sub>) of 2m

WYZ-610-6-RE3-C\_3.fid

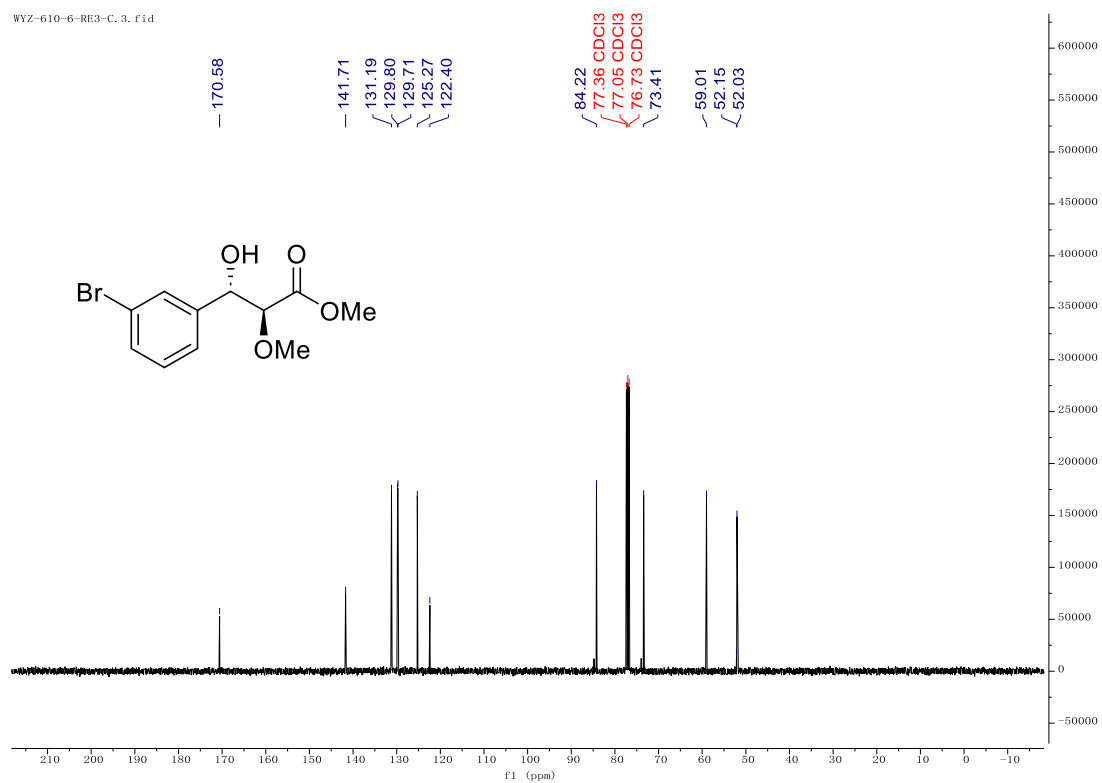

### <sup>1</sup>H NMR spectra (400 MHz, CDCl<sub>3</sub>) of 2n

WYZ-610-8-HL\_82.fid

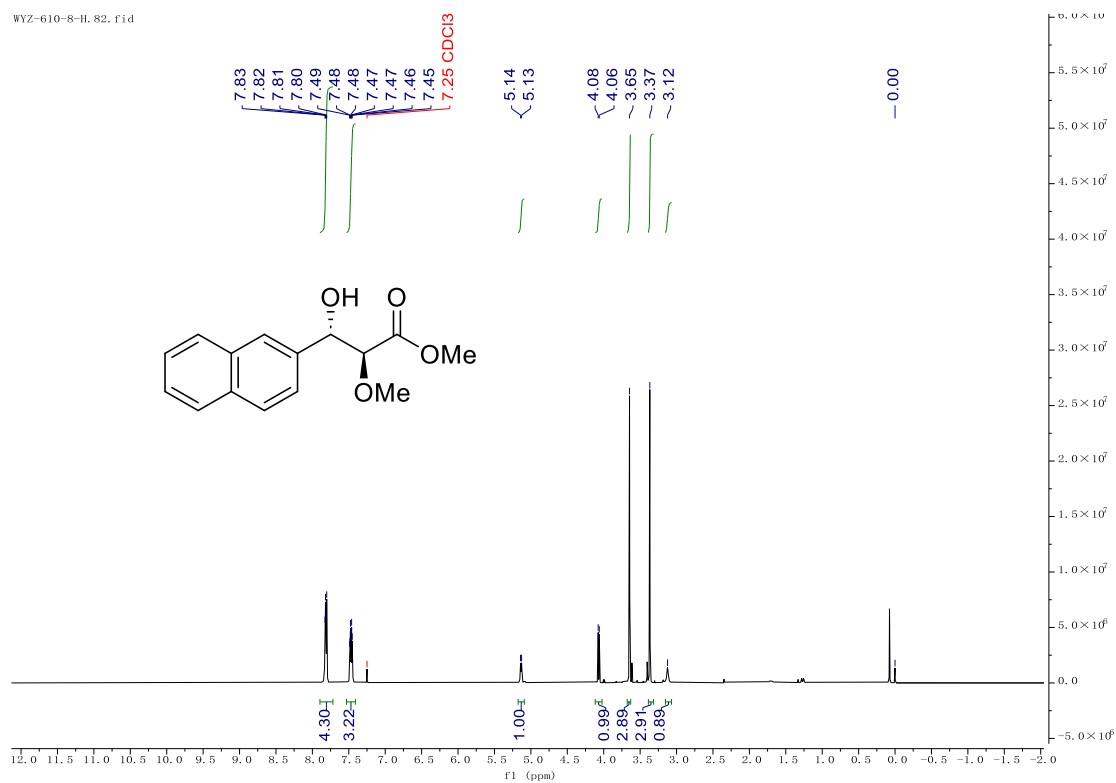

<sup>13</sup>C NMR spectra (101 MHz, CDCl<sub>3</sub>) of **2n**

WYZ-610-8-C\_83.fid

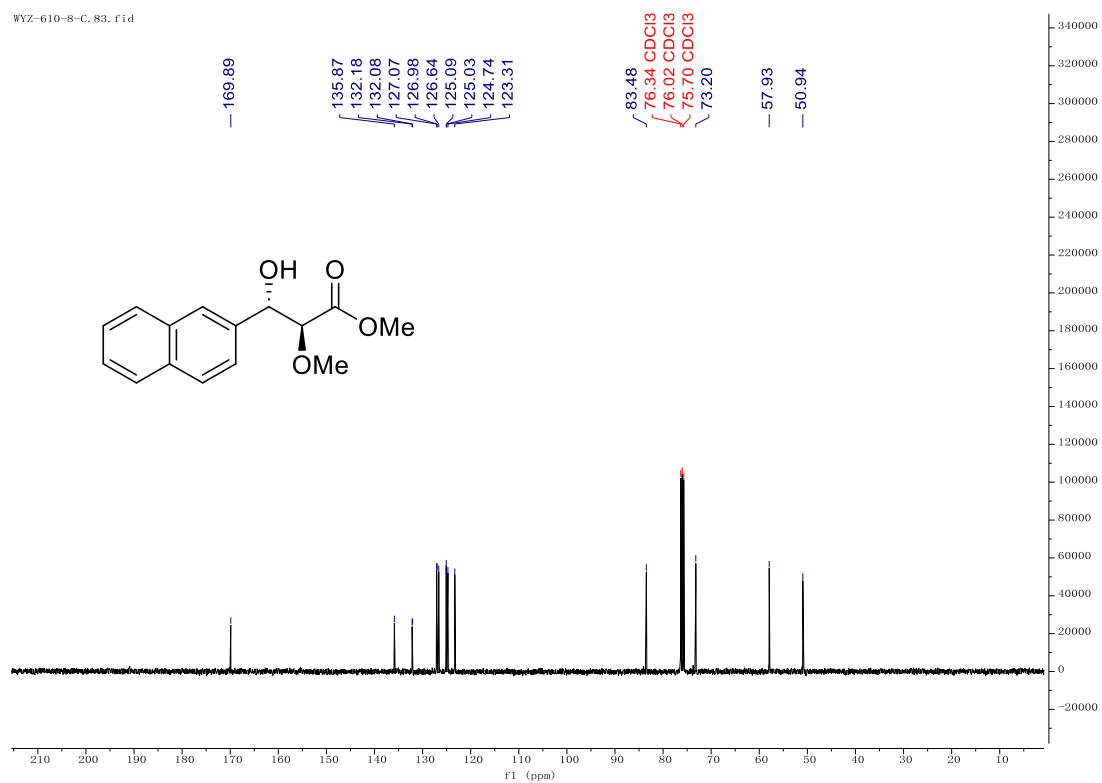

<sup>1</sup>H NMR spectra (400 MHz, CDCl<sub>3</sub>) of **2o**

WYZ-612-2-H\_1.fid

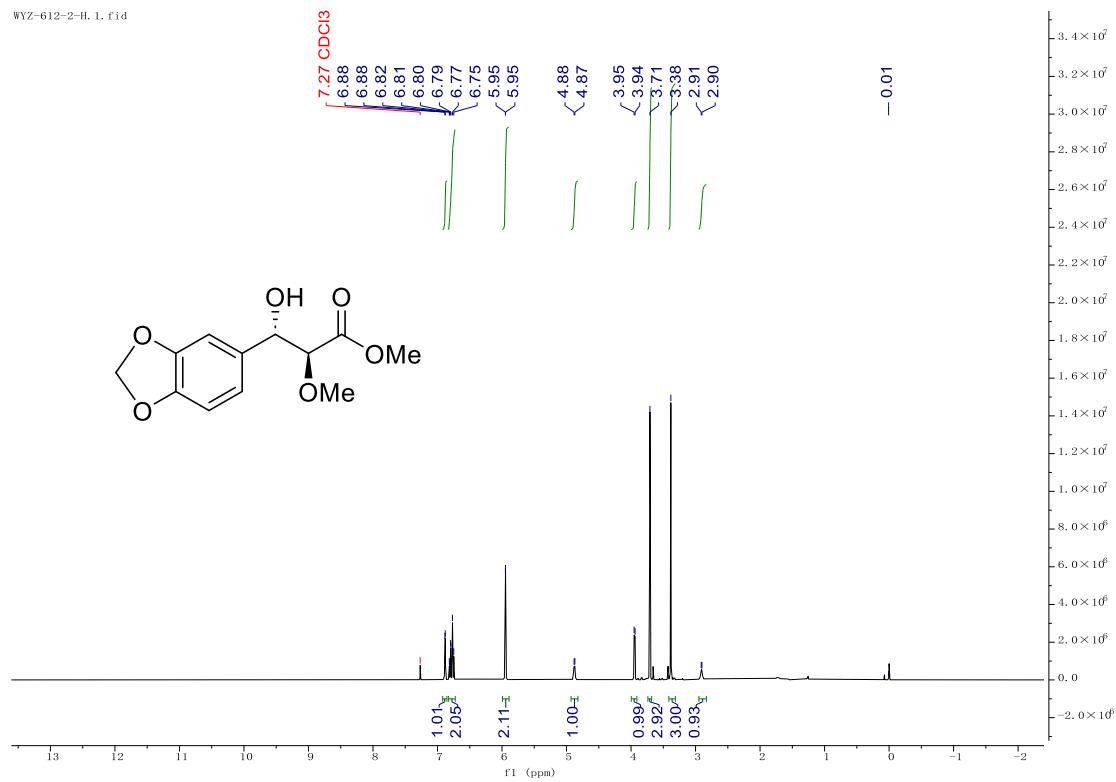



<sup>13</sup>C NMR spectra (101 MHz, CDCl<sub>3</sub>) of **2o**

WYZ-612-2-C. 3. fid

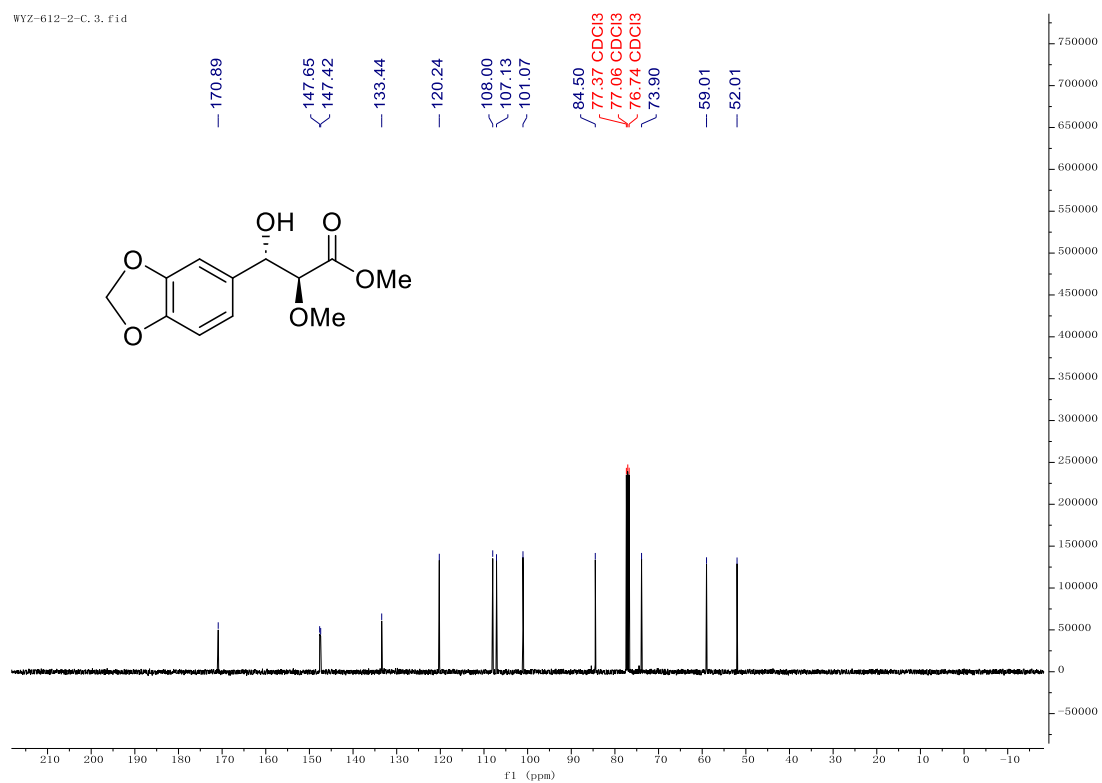

<sup>1</sup>H NMR spectra (400 MHz, CDCl<sub>3</sub>) of **2p**

WYZ-612-3-RE-H. 10. fid

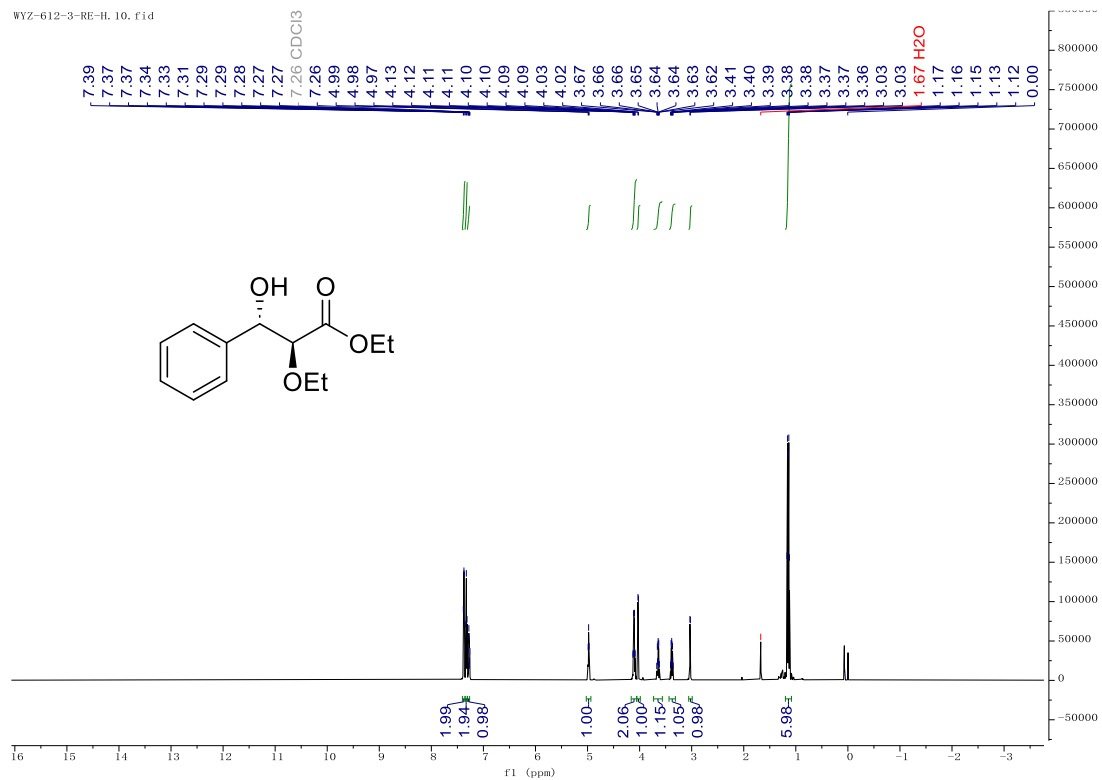

<sup>13</sup>C NMR spectra (101 MHz, CDCl<sub>3</sub>) of **2p**

WYZ-612-3-RE-C. 12. fid

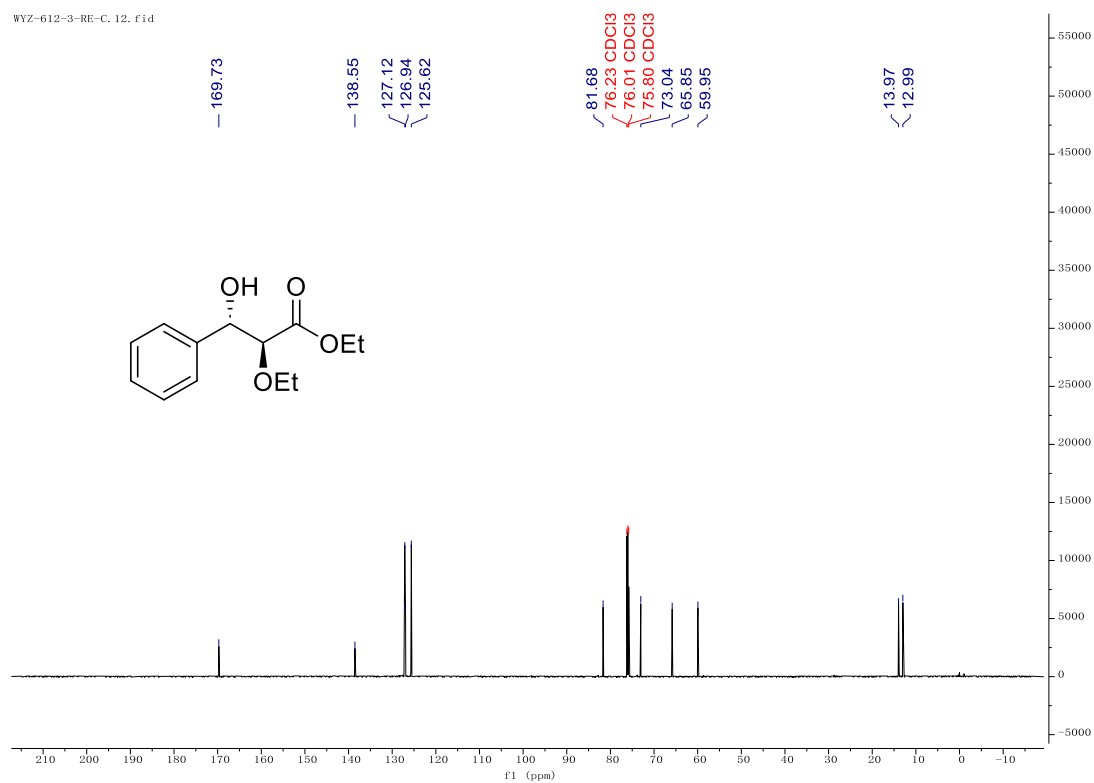

<sup>1</sup>H NMR spectra (400 MHz, CDCl<sub>3</sub>) of **2q**

WYZ-612-6-H. 10. fid

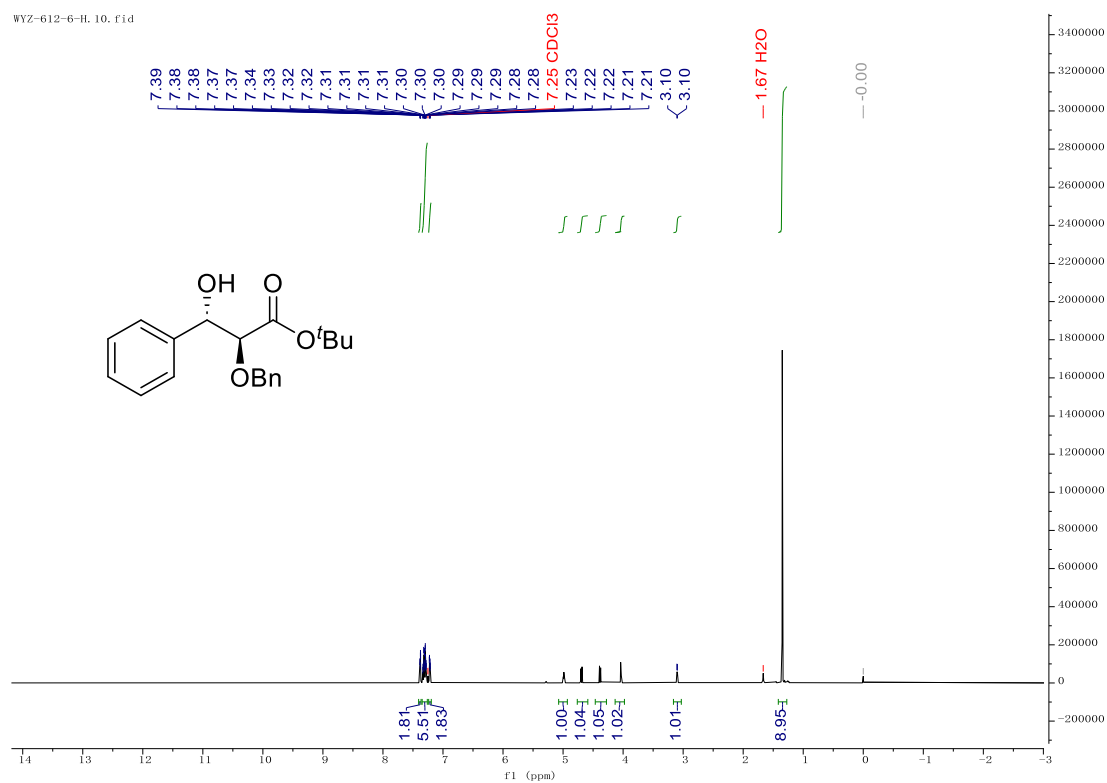

### <sup>13</sup>C NMR spectra (101 MHz, CDCl<sub>3</sub>) of **2q**

WYZ-612-6-C. 12. fid

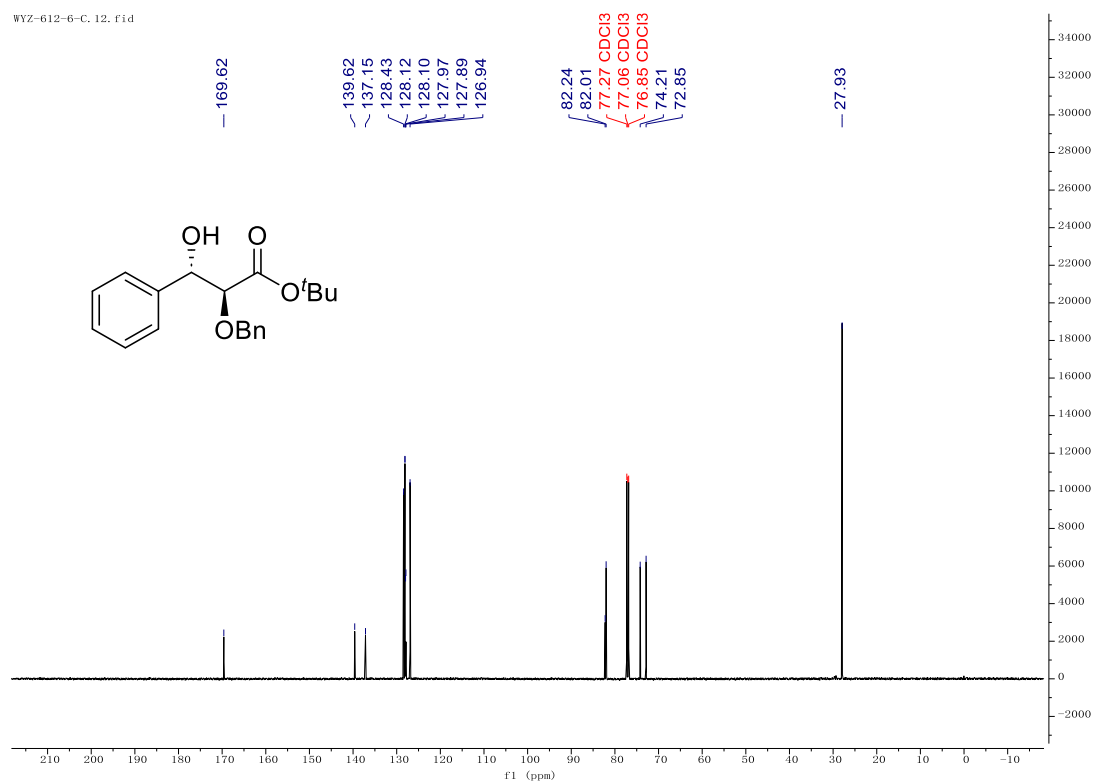

### <sup>1</sup>H NMR spectra (400 MHz, CDCl<sub>3</sub>) of **2r**

WYZ-612-5-RE-H. 22. fid

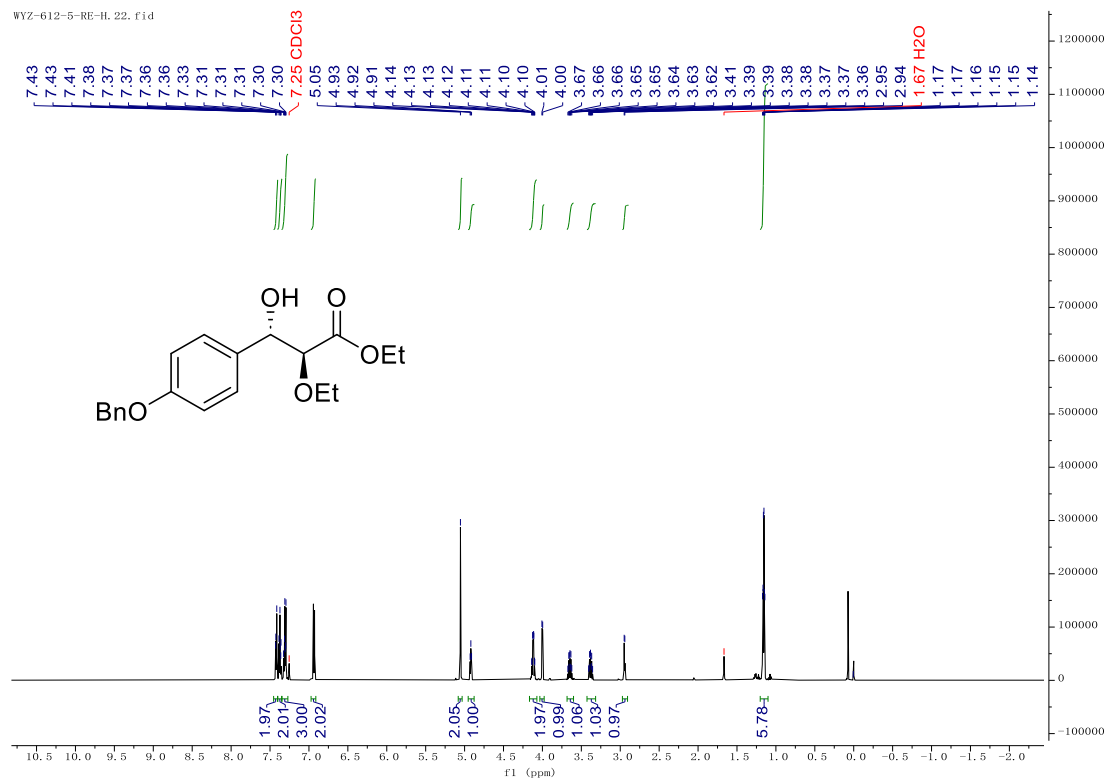

### <sup>13</sup>C NMR spectra (101 MHz, CDCl<sub>3</sub>) of 2r

WYZ-612-5-RE-H. 23. fid

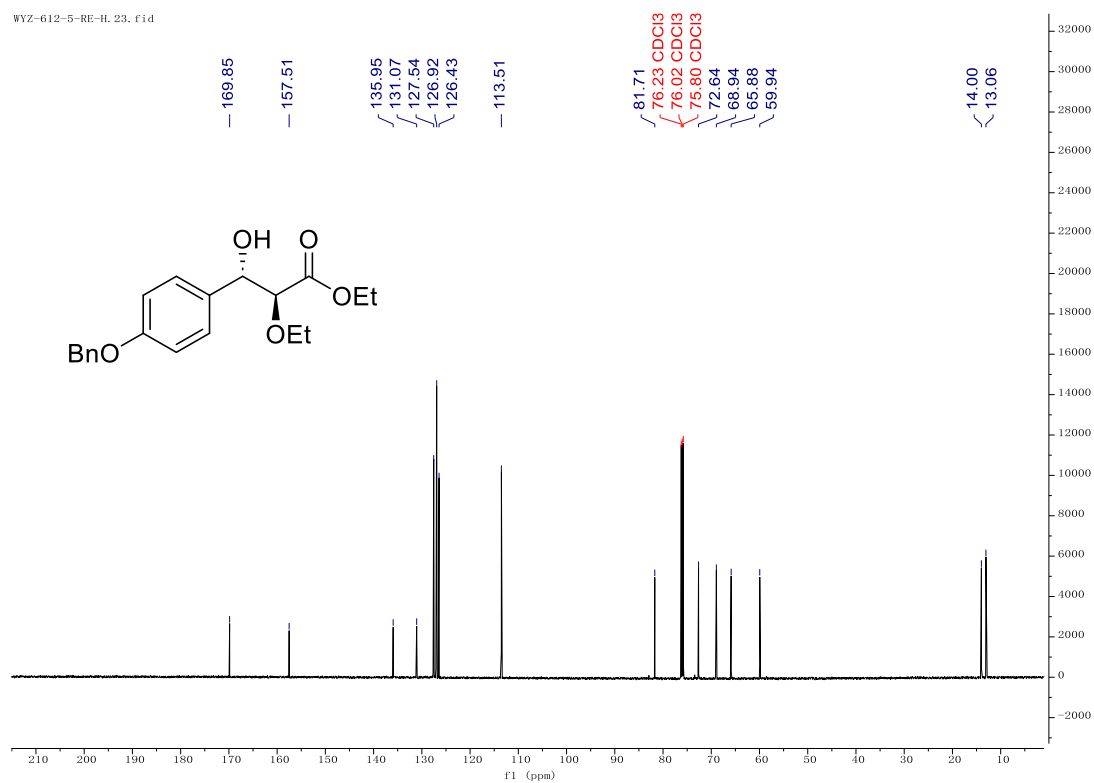

### <sup>1</sup>H NMR spectra (400 MHz, CDCl<sub>3</sub>) of 2s

zxd-117-rac. 10. fid

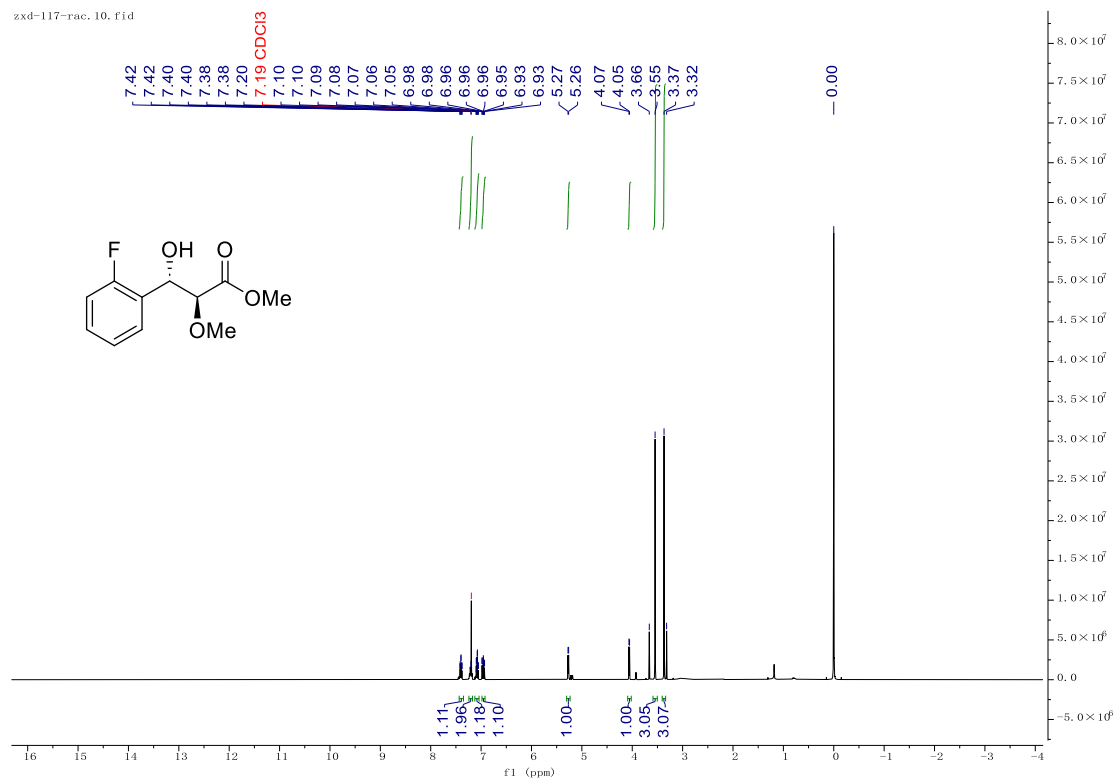

### <sup>13</sup>C NMR spectra (101 MHz, CDCl<sub>3</sub>) of **2s**

zxd-117-rac. 11. fid

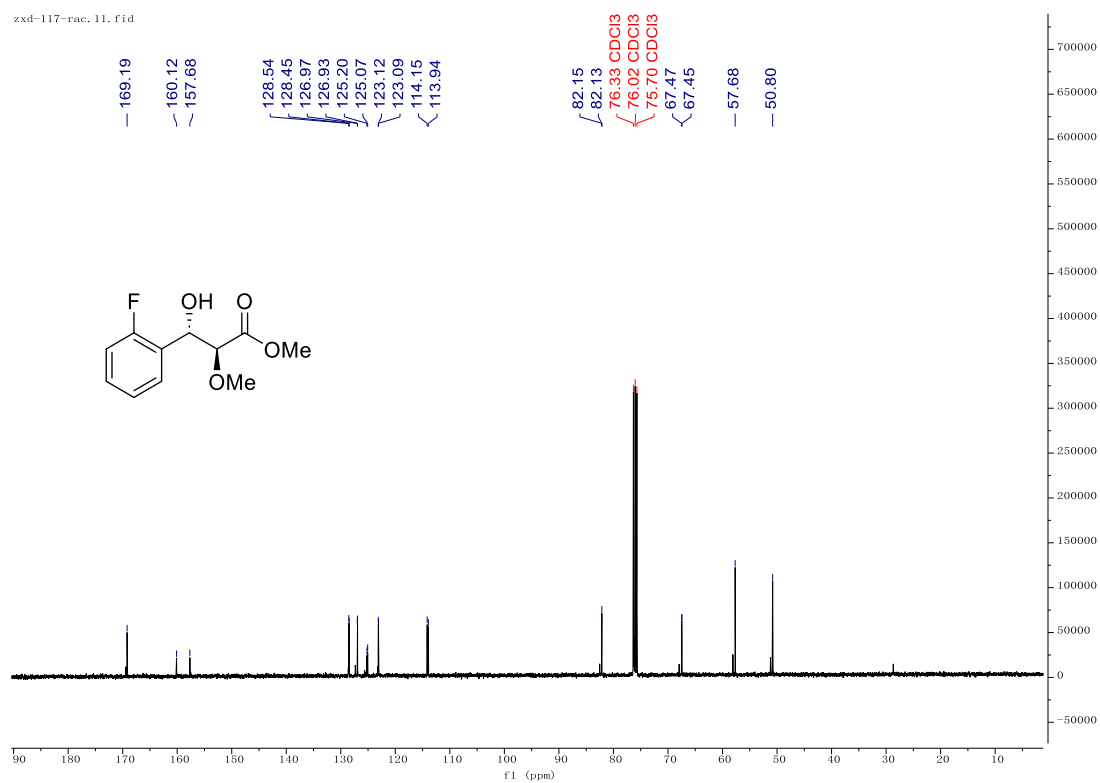

### <sup>19</sup>F NMR spectra (376 MHz, CDCl<sub>3</sub>) of **2s**

zxd-117-rac. 12. fid

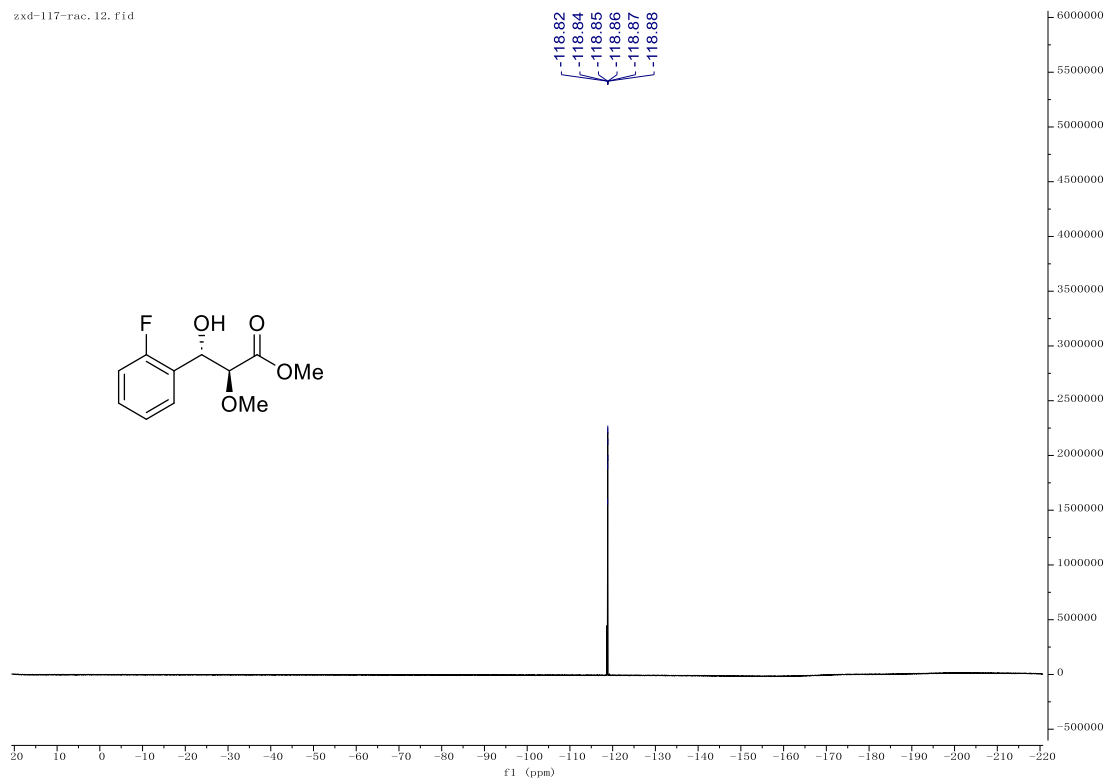

### <sup>1</sup>H NMR spectra (600 MHz, CDCl<sub>3</sub>) of **3**

WYZ-612-6-Ac-H. 10. F1d

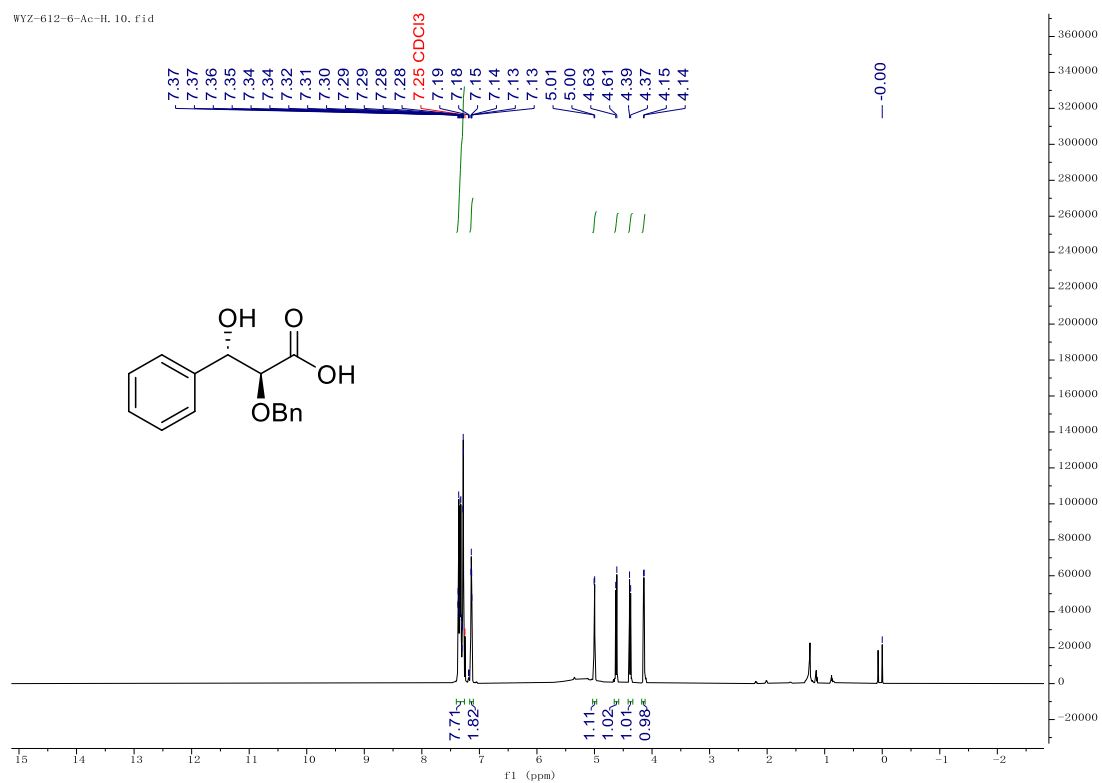

### <sup>13</sup>C NMR spectra (151 MHz, CDCl<sub>3</sub>) of **3**

WYZ-612-6-Ac-C. 12. F1d

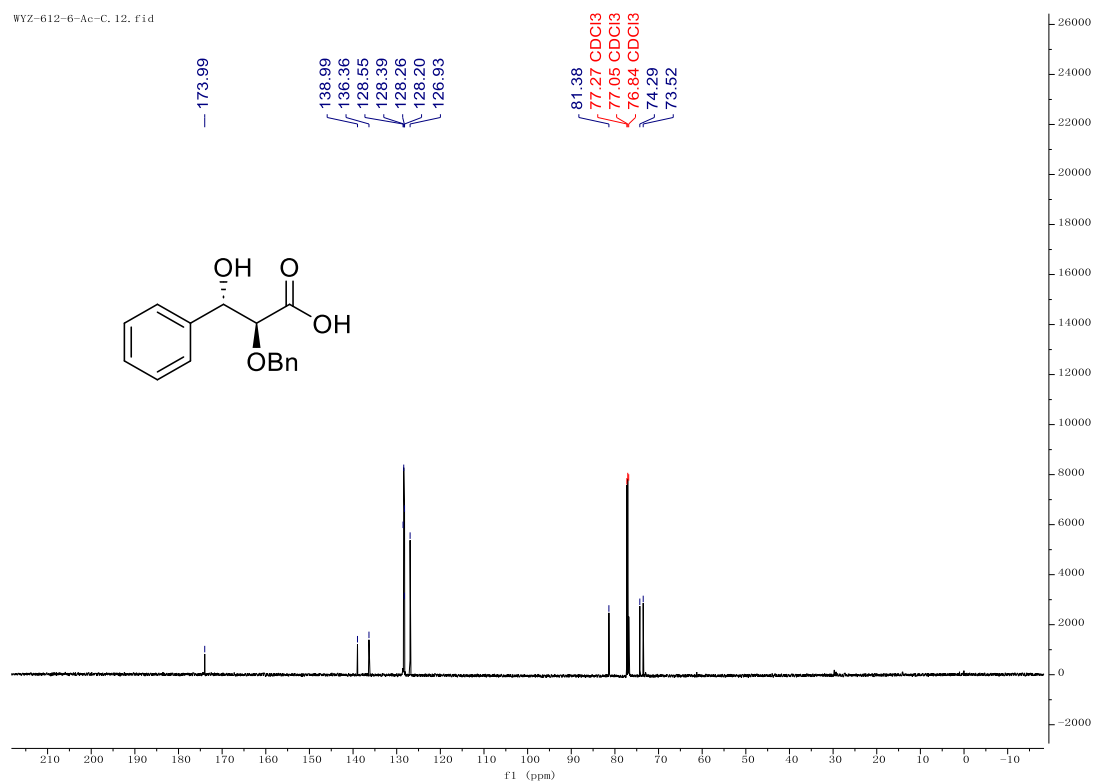

## 5. HPLC chromatograms

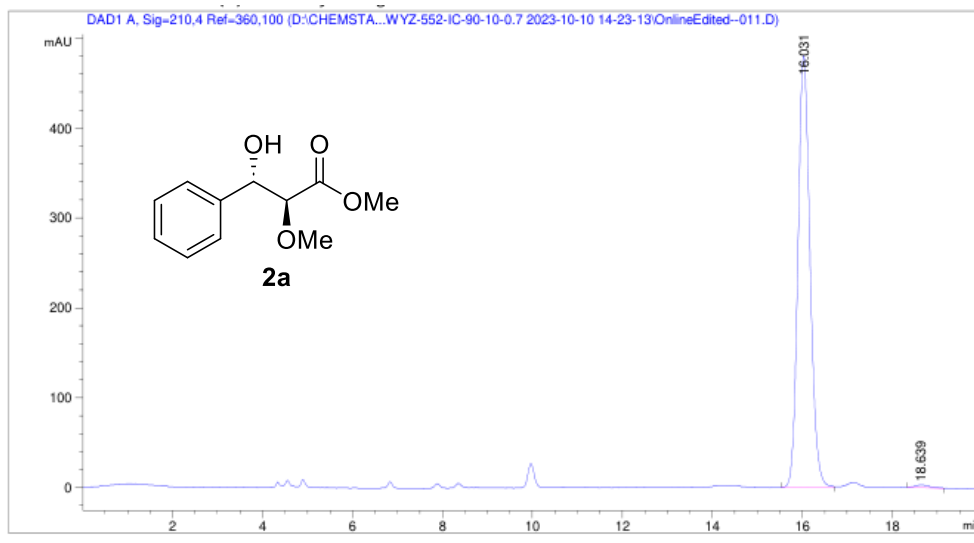

Signal 1: DAD1 A, Sig=210,4 Ref=360,100

| Peak # | RetTime [min] | Type | Width [min] | Area [mAU*s] | Height [mAU] | Area %  |
|--------|---------------|------|-------------|--------------|--------------|---------|
| 1      | 16.031        | BB   | 0.2862      | 8889.41211   | 479.74789    | 99.2935 |
| 2      | 18.639        | BB   | 0.2583      | 63.25026     | 2.99597      | 0.7065  |

Totals : 8952.66236 482.74387

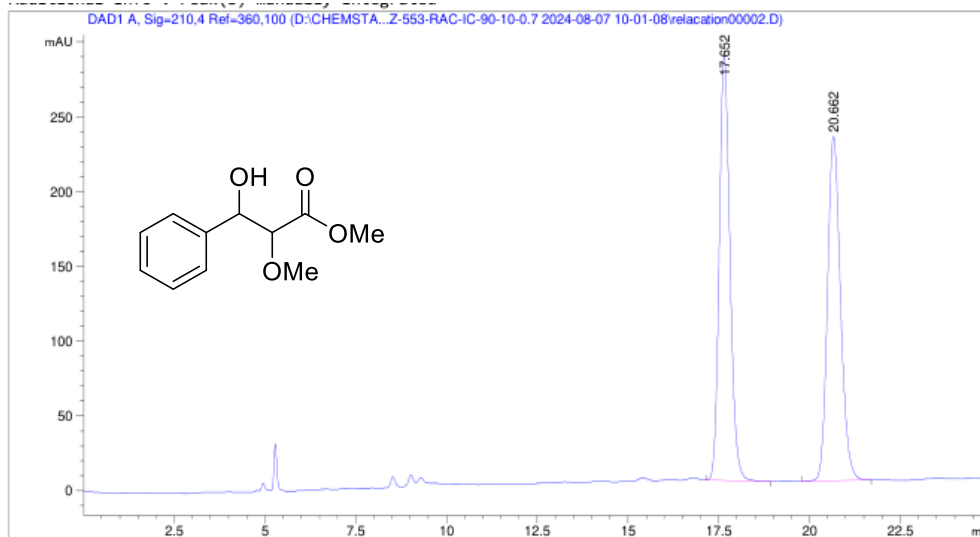

Signal 1: DAD1 A, Sig=210,4 Ref=360,100

| Peak # | RetTime [min] | Type | Width [min] | Area [mAU*s] | Height [mAU] | Area %  |
|--------|---------------|------|-------------|--------------|--------------|---------|
| 1      | 17.652        | BB   | 0.3150      | 5805.73535   | 283.41510    | 50.2096 |
| 2      | 20.662        | BB   | 0.3858      | 5757.26904   | 230.16724    | 49.7904 |

Totals : 1.15630e4 513.58234

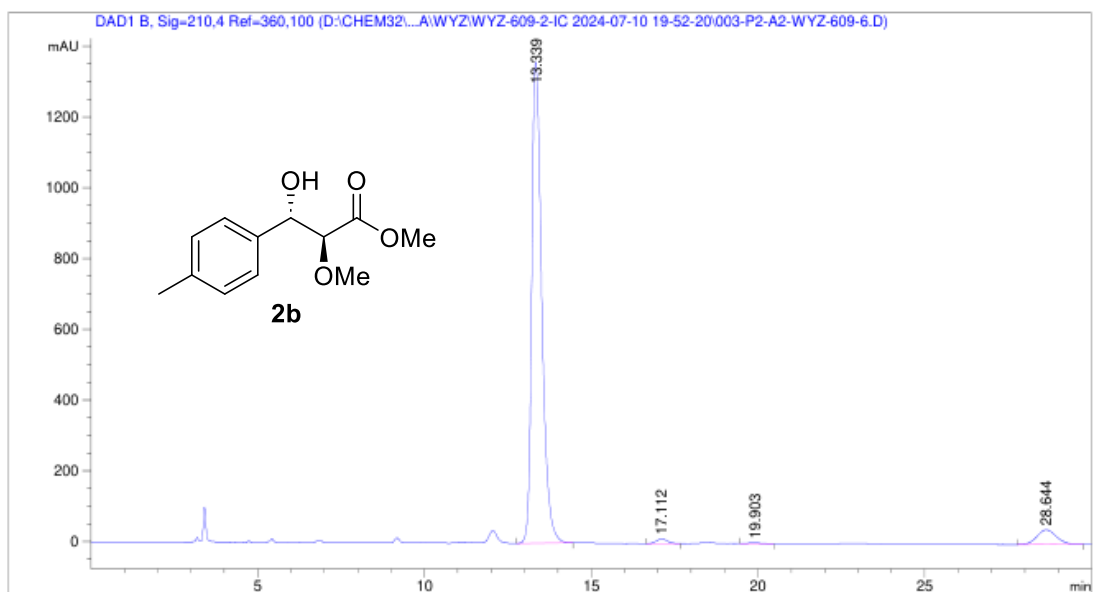

Signal 1: DAD1 B, Sig=210,4 Ref=360,100

| Peak # | RetTime [min] | Type | Width [min] | Area [mAU*s] | Height [mAU] | Area %  |
|--------|---------------|------|-------------|--------------|--------------|---------|
| 1      | 13.339        | BB   | 0.3202      | 2.84382e4    | 1358.75134   | 93.2694 |
| 2      | 17.112        | BB   | 0.3545      | 308.22278    | 13.09833     | 1.0109  |
| 3      | 19.903        | BB   | 0.3619      | 61.99780     | 2.10352      | 0.2033  |
| 4      | 28.644        | BB   | 0.5660      | 1681.96204   | 41.39870     | 5.5164  |

Totals : 3.04904e4 1415.35189

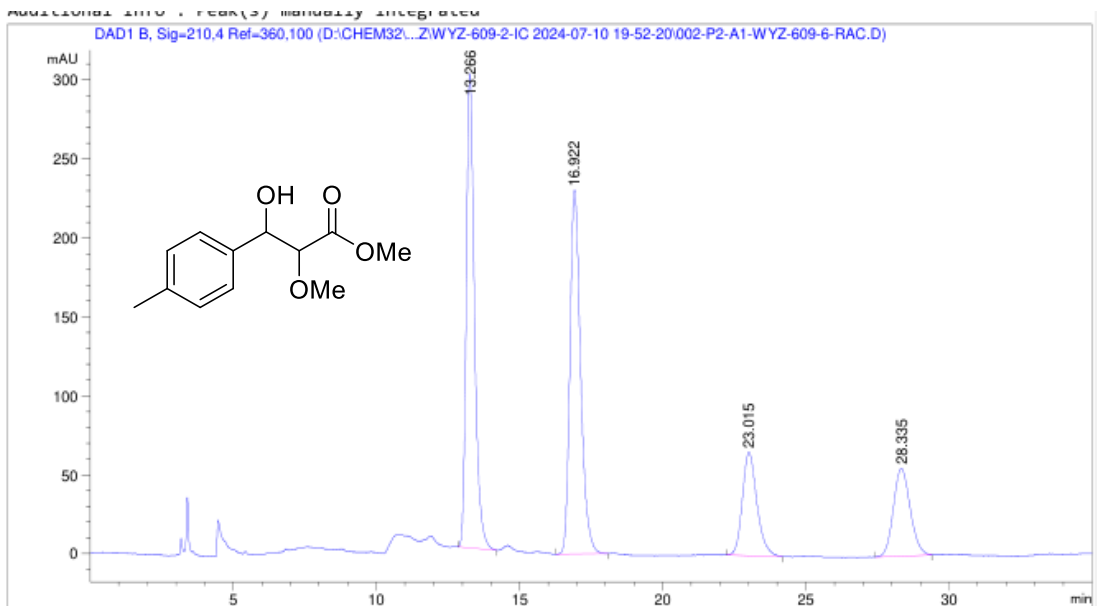

Signal 1: DAD1 B, Sig=210,4 Ref=360,100

| Peak # | RetTime [min] | Type | Width [min] | Area [mAU*s] | Height [mAU] | Area %  |
|--------|---------------|------|-------------|--------------|--------------|---------|
| 1      | 13.266        | BB   | 0.3015      | 5953.34033   | 300.03384    | 36.1030 |
| 2      | 16.922        | BB   | 0.3975      | 5953.59424   | 230.40375    | 36.1046 |
| 3      | 23.015        | BB   | 0.5308      | 2316.46240   | 65.47560     | 14.0478 |
| 4      | 28.335        | BB   | 0.5754      | 2266.46338   | 55.38942     | 13.7446 |

Totals : 1.64899e4 651.30261



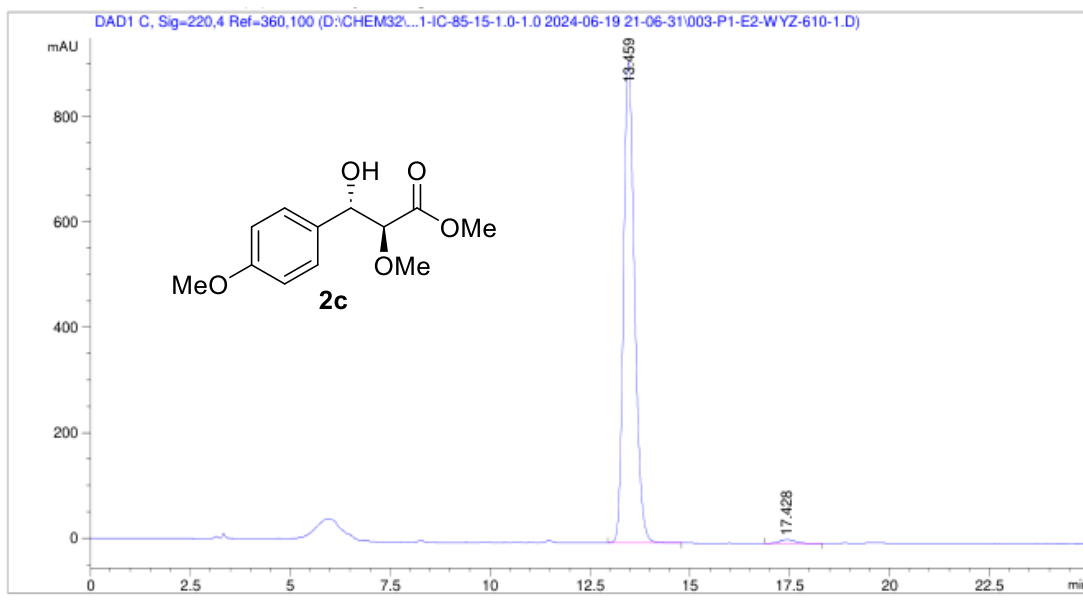

Signal 1: DAD1 C, Sig=220,4 Ref=360,100

| Peak # | RetTime [min] | Type | Width [min] | Area [mAU*s] | Height [mAU] | Area %  |
|--------|---------------|------|-------------|--------------|--------------|---------|
| 1      | 13.459        | BB   | 0.2959      | 1.75105e4    | 912.41620    | 98.9782 |
| 2      | 17.428        | BB   | 0.3716      | 180.77164    | 7.08639      | 1.0218  |

Totals : 1.76912e4 919.50259

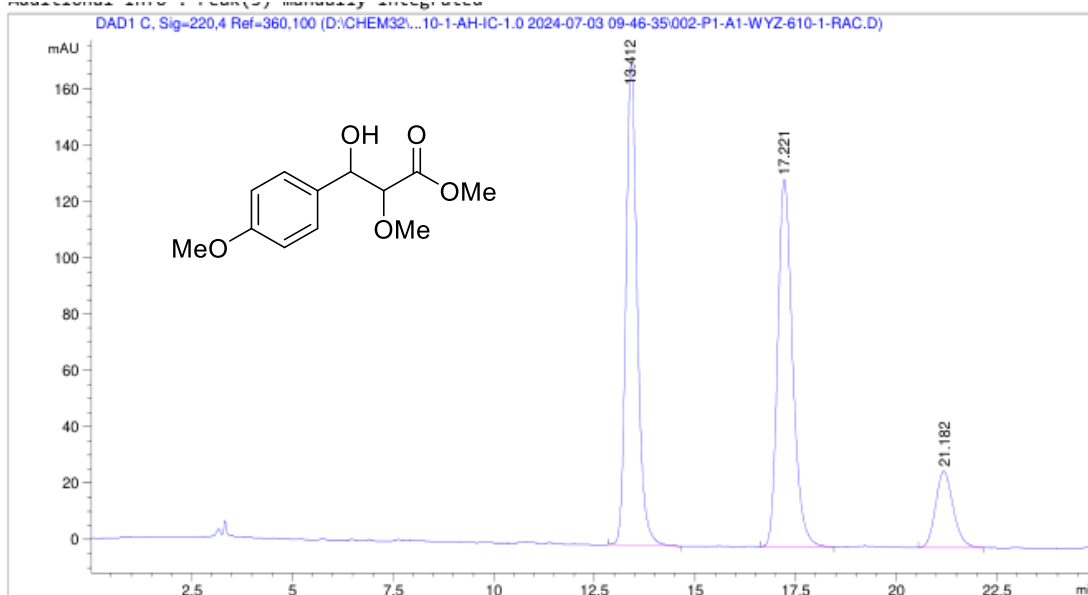

Signal 1: DAD1 C, Sig=220,4 Ref=360,100

| Peak # | RetTime [min] | Type | Width [min] | Area [mAU*s] | Height [mAU] | Area %  |
|--------|---------------|------|-------------|--------------|--------------|---------|
| 1      | 13.412        | BB   | 0.3008      | 3349.14258   | 170.77104    | 44.5706 |
| 2      | 17.221        | BB   | 0.3904      | 3333.26465   | 130.31335    | 44.3593 |
| 3      | 21.182        | BB   | 0.4625      | 831.83936    | 27.22568     | 11.0702 |

Totals : 7514.24658 328.31008

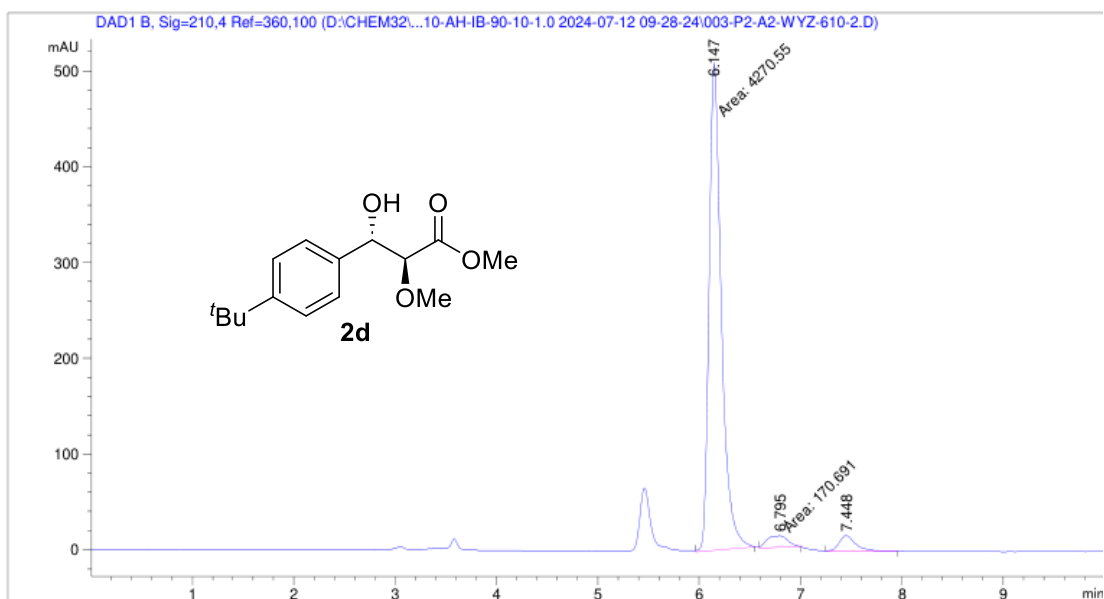

Signal 1: DAD1 B, Sig=210,4 Ref=360,100

| Peak # | RetTime [min] | Type | Width [min] | Area [mAU*s] | Height [mAU] | Area %  |
|--------|---------------|------|-------------|--------------|--------------|---------|
| 1      | 6.147         | MM   | 0.1398      | 4270.54736   | 509.06567    | 92.3581 |
| 2      | 6.795         | MM   | 0.2395      | 170.69121    | 11.87840     | 3.6915  |
| 3      | 7.448         | VB   | 0.1686      | 182.66125    | 16.07520     | 3.9504  |

Totals : 4623.89983 537.01928

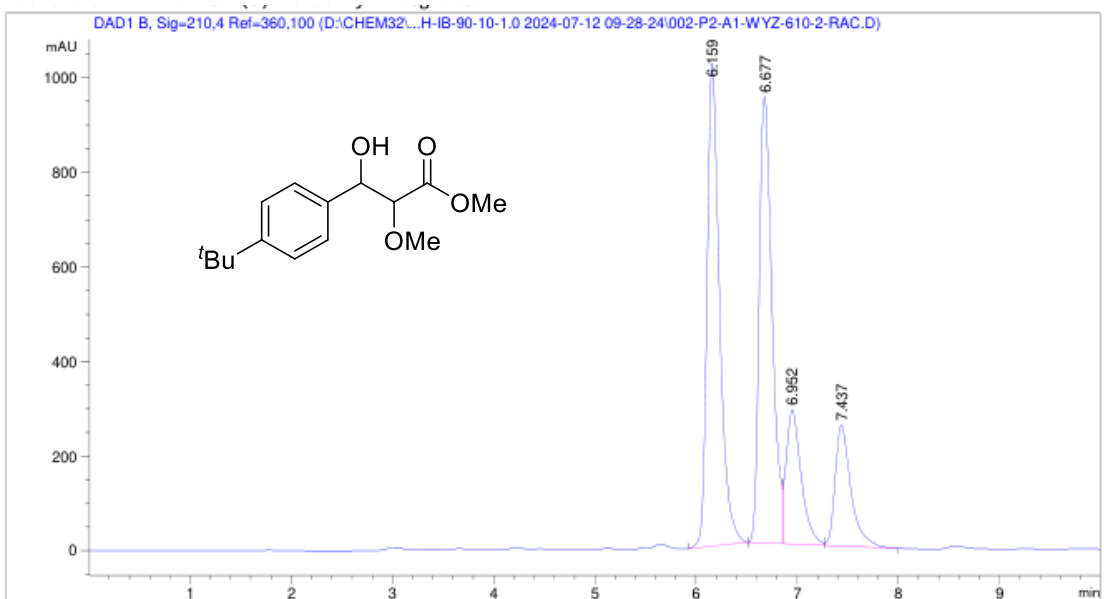

Signal 1: DAD1 B, Sig=210,4 Ref=360,100

| Peak # | RetTime [min] | Type | Width [min] | Area [mAU*s] | Height [mAU] | Area %  |
|--------|---------------|------|-------------|--------------|--------------|---------|
| 1      | 6.159         | BB   | 0.1299      | 8750.66113   | 1021.74054   | 38.3219 |
| 2      | 6.677         | BV   | 0.1349      | 8321.75781   | 943.38965    | 36.4436 |
| 3      | 6.952         | VV   | 0.1564      | 2985.99048   | 284.60895    | 13.0766 |
| 4      | 7.437         | VB   | 0.1626      | 2776.23169   | 255.78339    | 12.1580 |

Totals : 2.28346e4 2505.52252

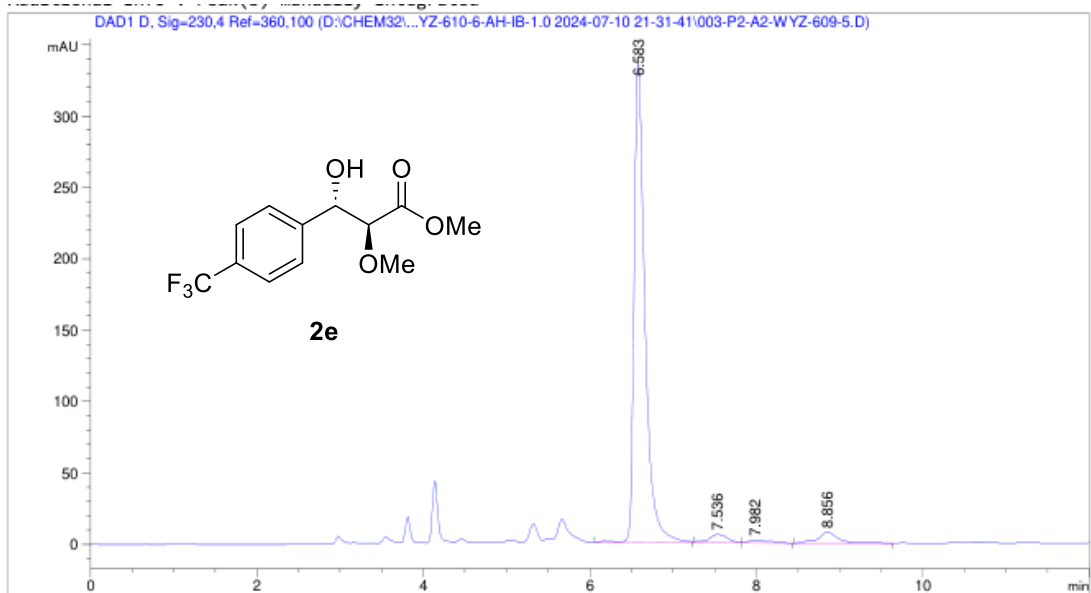

Signal 1: DAD1 D, Sig=230,4 Ref=360,100

| Peak # | RetTime [min] | Type | Width [min] | Area [mAU*s] | Height [mAU] | Area %  |
|--------|---------------|------|-------------|--------------|--------------|---------|
| 1      | 6.583         | VB R | 0.1350      | 3021.57715   | 335.60306    | 92.6395 |
| 2      | 7.536         | BB   | 0.2239      | 73.47603     | 5.23036      | 2.2527  |
| 3      | 7.982         | BB   | 0.2267      | 30.48144     | 1.86451      | 0.9345  |
| 4      | 8.856         | BB   | 0.2472      | 136.11501    | 7.81410      | 4.1732  |

Totals : 3261.64962 350.51203

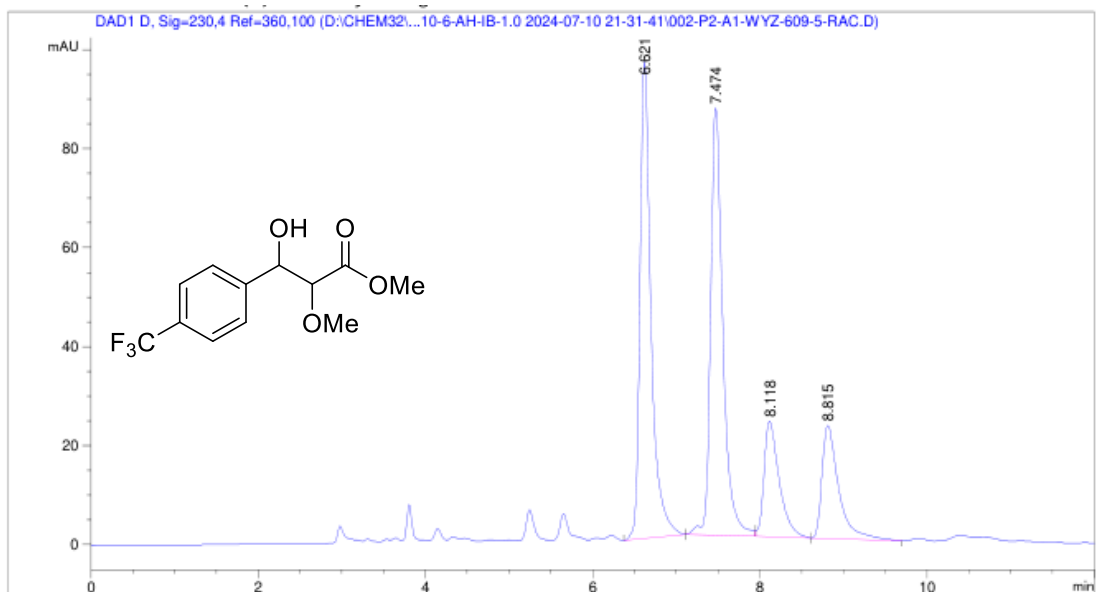

Signal 1: DAD1 D, Sig=230,4 Ref=360,100

| Peak # | RetTime [min] | Type | Width [min] | Area [mAU*s] | Height [mAU] | Area %  |
|--------|---------------|------|-------------|--------------|--------------|---------|
| 1      | 6.621         | BB   | 0.1367      | 881.05060    | 96.30665     | 37.1964 |
| 2      | 7.474         | VV R | 0.1511      | 876.71069    | 86.25386     | 37.0132 |
| 3      | 8.118         | VB   | 0.1874      | 294.57959    | 23.31674     | 12.4366 |
| 4      | 8.815         | BB   | 0.2059      | 316.30362    | 22.79578     | 13.3538 |

Totals : 2368.64450 228.67303

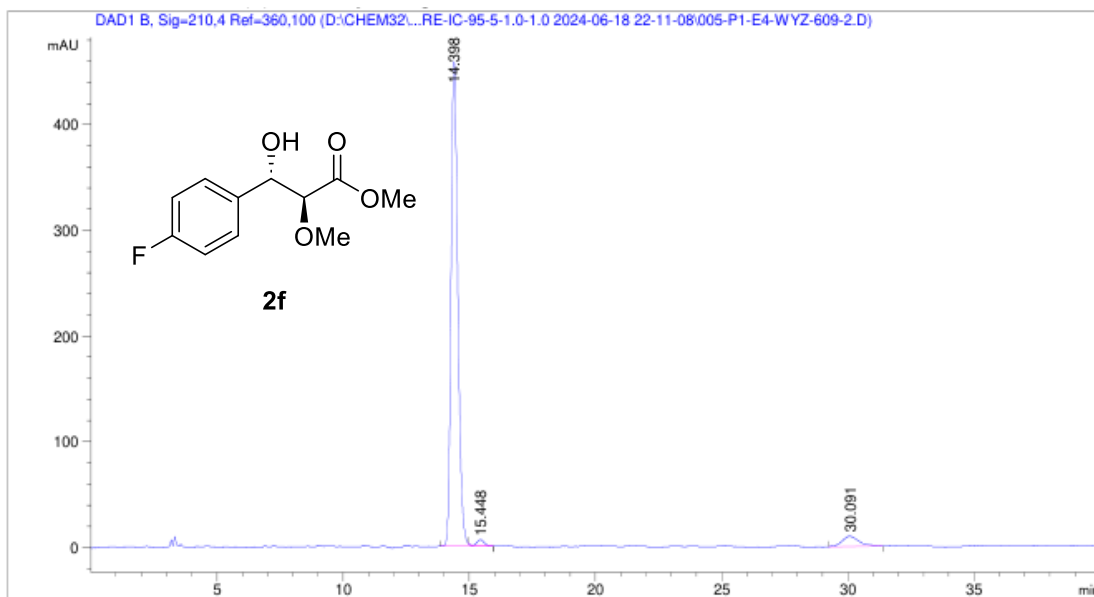

Signal 1: DAD1 B, Sig=210,4 Ref=360,100

| Peak # | RetTime [min] | Type | Width [min] | Area [mAU*s] | Height [mAU] | Area %  |
|--------|---------------|------|-------------|--------------|--------------|---------|
| 1      | 14.398        | BV R | 0.2884      | 8584.82227   | 458.58093    | 93.6617 |
| 2      | 15.448        | VB E | 0.2658      | 125.48026    | 6.10574      | 1.3690  |
| 3      | 30.091        | BB   | 0.5930      | 455.47186    | 9.64349      | 4.9693  |

Totals : 9165.77438 474.33016

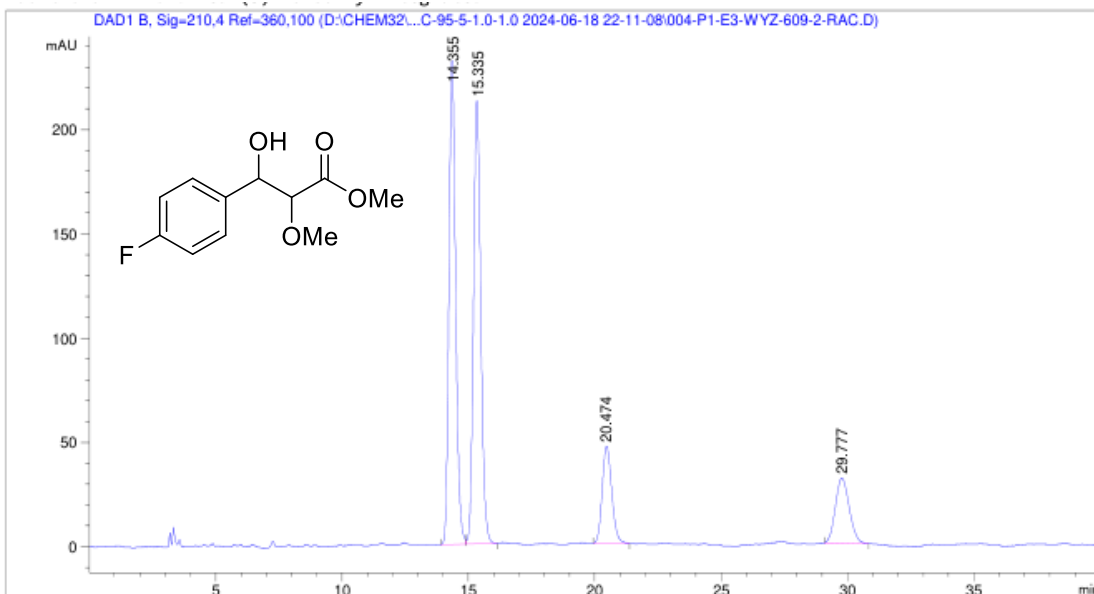

Signal 1: DAD1 B, Sig=210,4 Ref=360,100

| Peak # | RetTime [min] | Type | Width [min] | Area [mAU*s] | Height [mAU] | Area %  |
|--------|---------------|------|-------------|--------------|--------------|---------|
| 1      | 14.355        | BV   | 0.2831      | 4274.63428   | 231.86563    | 39.0378 |
| 2      | 15.335        | VB   | 0.3080      | 4261.93408   | 212.50787    | 38.9218 |
| 3      | 20.474        | BB   | 0.4047      | 1223.21338   | 46.53404     | 11.1709 |
| 4      | 29.777        | BB   | 0.5577      | 1190.21167   | 31.29240     | 10.8695 |

Totals : 1.09500e4 522.19994

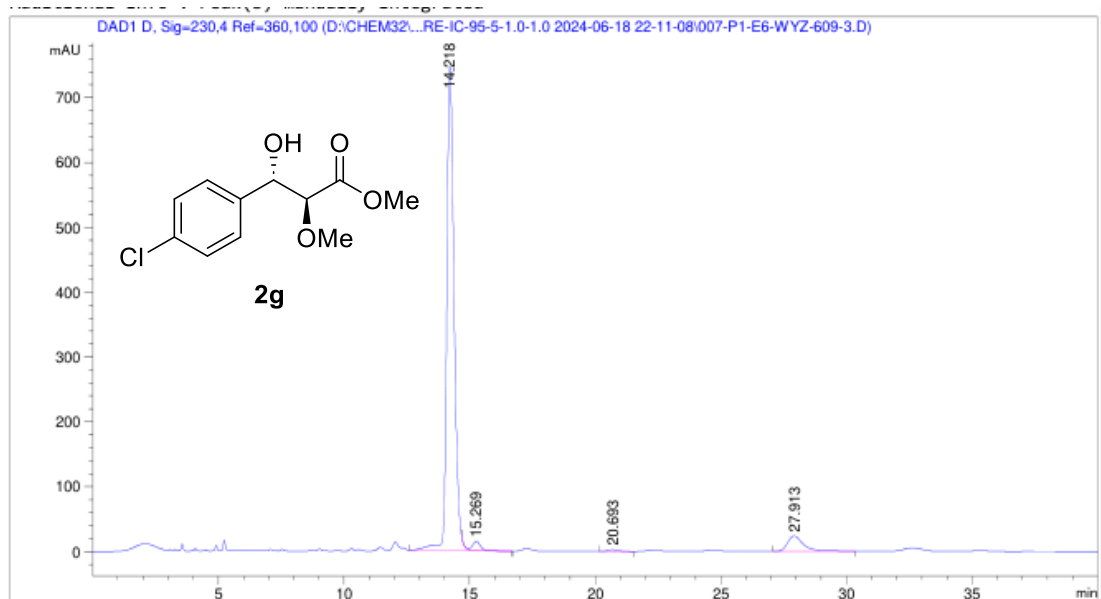

Signal 1: DAD1 D, Sig=230,4 Ref=360,100

| Peak # | RetTime [min] | Type | Width [min] | Area [mAU*s] | Height [mAU] | Area %  |
|--------|---------------|------|-------------|--------------|--------------|---------|
| 1      | 14.218        | BV R | 0.3112      | 1.51705e4    | 746.14099    | 91.2174 |
| 2      | 15.269        | VB E | 0.3405      | 338.26062    | 14.81012     | 2.0339  |
| 3      | 20.693        | BB   | 0.3563      | 80.31788     | 2.87205      | 0.4829  |
| 4      | 27.913        | BB   | 0.6511      | 1042.07617   | 23.60020     | 6.2658  |

Totals : 1.66312e4 787.42336

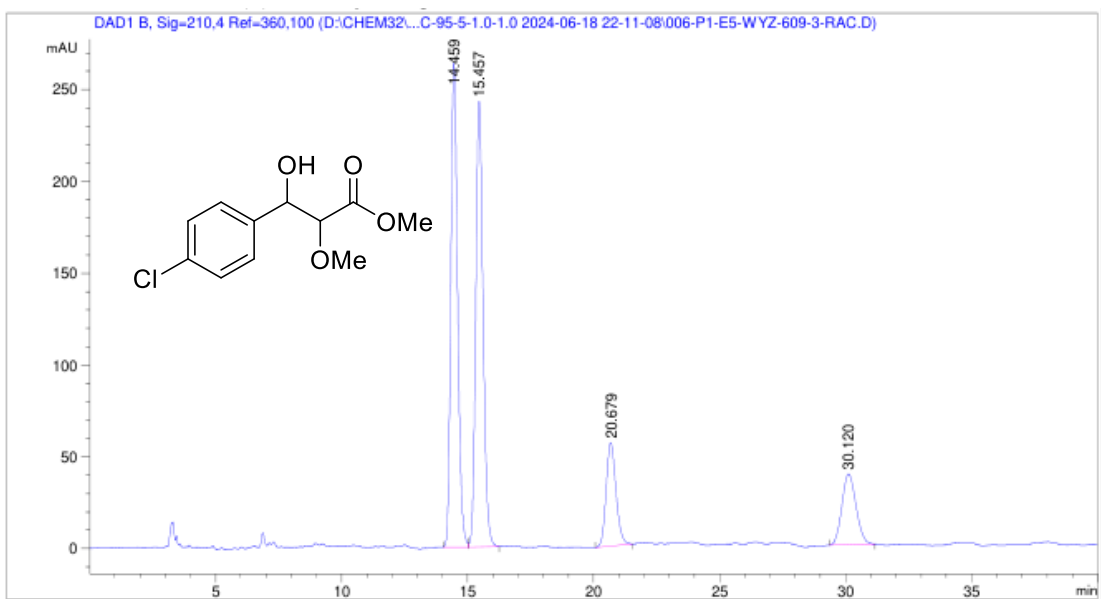

Signal 1: DAD1 B, Sig=210,4 Ref=360,100

| Peak # | RetTime [min] | Type | Width [min] | Area [mAU*s] | Height [mAU] | Area %  |
|--------|---------------|------|-------------|--------------|--------------|---------|
| 1      | 14.459        | BV   | 0.2882      | 4926.91113   | 263.40848    | 38.2729 |
| 2      | 15.457        | VB   | 0.3109      | 4924.94287   | 242.57971    | 38.2576 |
| 3      | 20.679        | BB   | 0.4097      | 1525.49646   | 56.38049     | 11.8503 |
| 4      | 30.120        | BB   | 0.5973      | 1495.76233   | 38.49614     | 11.6193 |

Totals : 1.28731e4 600.86482

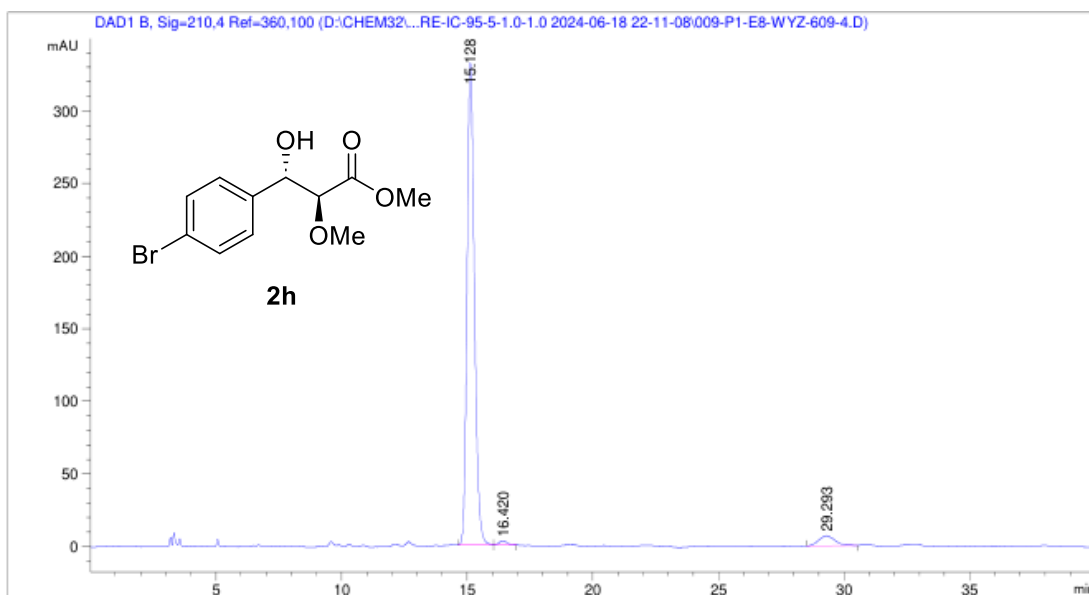

Signal 1: DAD1 B, Sig=210,4 Ref=360,100

| Peak # | RetTime [min] | Type | Width [min] | Area [mAU*s] | Height [mAU] | Area %  |
|--------|---------------|------|-------------|--------------|--------------|---------|
| 1      | 15.128        | BB   | 0.3122      | 6720.53711   | 331.93326    | 94.8785 |
| 2      | 16.420        | BB   | 0.2616      | 56.62384     | 2.73409      | 0.7994  |
| 3      | 29.293        | BB   | 0.5478      | 306.14413    | 6.81873      | 4.3221  |

Totals : 7083.30508 341.48607

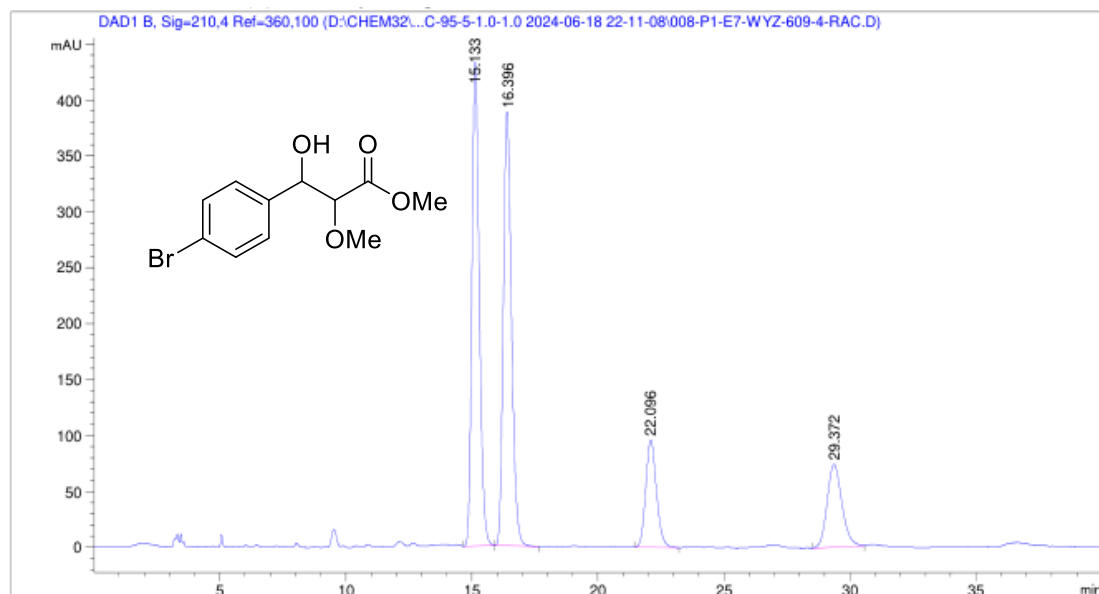

Signal 1: DAD1 B, Sig=210,4 Ref=360,100

| Peak # | RetTime [min] | Type | Width [min] | Area [mAU*s] | Height [mAU] | Area %  |
|--------|---------------|------|-------------|--------------|--------------|---------|
| 1      | 15.133        | BB   | 0.3119      | 8747.77930   | 432.59357    | 37.4580 |
| 2      | 16.396        | BB   | 0.3473      | 8752.95410   | 387.85748    | 37.4801 |
| 3      | 22.096        | BB   | 0.4525      | 2856.55884   | 96.17087     | 12.2318 |
| 4      | 29.372        | BB   | 0.6168      | 2996.28613   | 73.93647     | 12.8301 |

Totals : 2.33536e4 990.55839

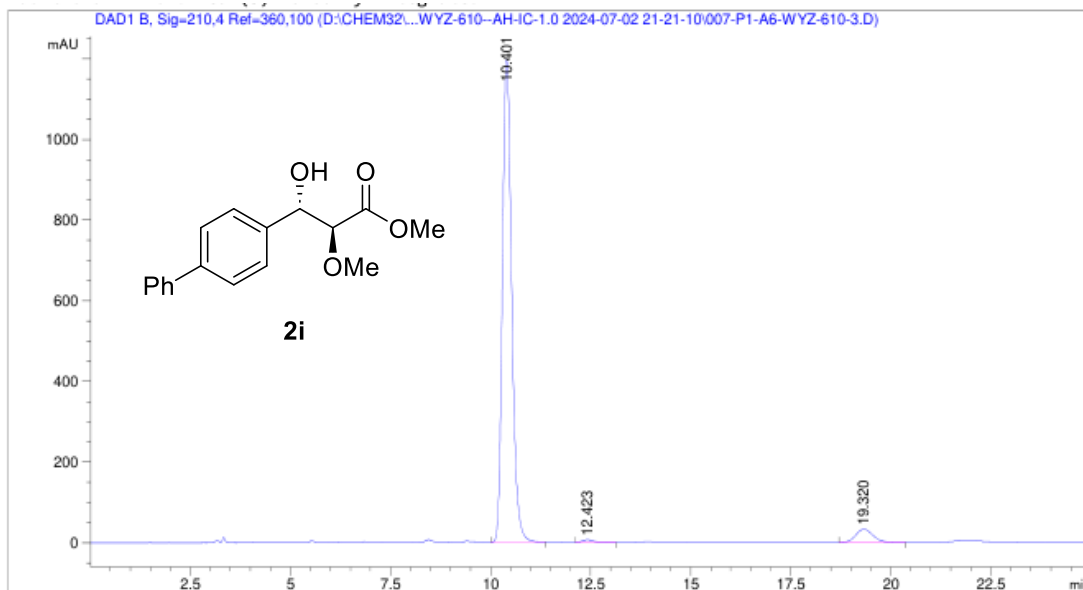

Signal 1: DAD1 B, Sig=210,4 Ref=360,100

| Peak # | RetTime [min] | Type | Width [min] | Area [mAU*s] | Height [mAU] | Area %  |
|--------|---------------|------|-------------|--------------|--------------|---------|
| 1      | 10.401        | BB   | 0.2491      | 1.91682e4    | 1195.47449   | 94.5686 |
| 2      | 12.423        | BB   | 0.2908      | 125.95611    | 6.36633      | 0.6214  |
| 3      | 19.320        | BB   | 0.4486      | 974.94946    | 33.01235     | 4.8100  |

Totals : 2.02692e4 1234.85317

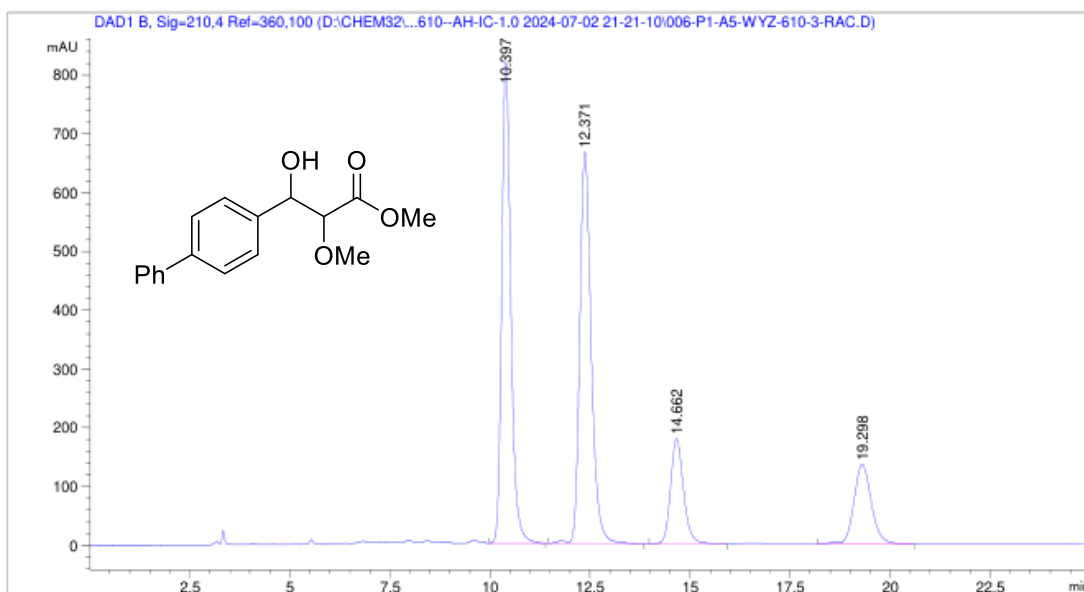

Signal 1: DAD1 B, Sig=210,4 Ref=360,100

| Peak # | RetTime [min] | Type | Width [min] | Area [mAU*s] | Height [mAU] | Area %  |
|--------|---------------|------|-------------|--------------|--------------|---------|
| 1      | 10.397        | VB   | 0.2438      | 1.30365e4    | 818.50549    | 38.0331 |
| 2      | 12.371        | VB R | 0.3006      | 1.31218e4    | 666.50177    | 38.2819 |
| 3      | 14.662        | BB   | 0.3454      | 4037.01221   | 178.83653    | 11.7777 |
| 4      | 19.298        | BB   | 0.4634      | 4081.45190   | 135.51137    | 11.9073 |

Totals : 3.42768e4 1799.35516

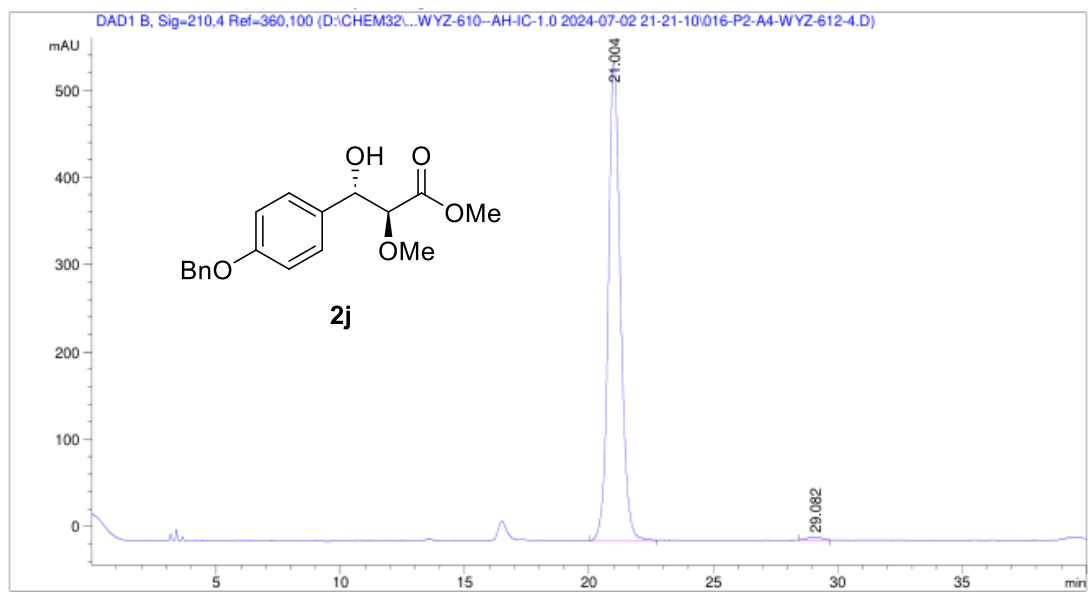

Signal 1: DAD1 B, Sig=210,4 Ref=360,100

| Peak # | RetTime [min] | Type | Width [min] | Area [mAU*s] | Height [mAU] | Area %  |
|--------|---------------|------|-------------|--------------|--------------|---------|
| 1      | 21.004        | BB   | 0.5125      | 1.85438e4    | 548.33148    | 99.3074 |
| 2      | 29.082        | BB   | 0.4577      | 129.33559    | 3.40099      | 0.6926  |

Totals : 1.86731e4 551.73247

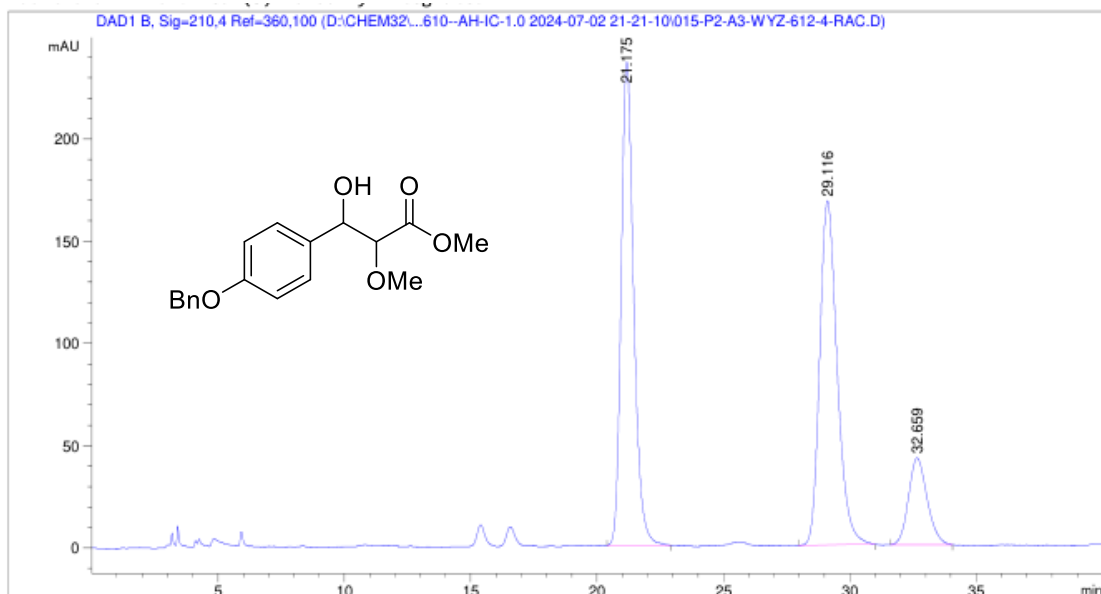

Signal 1: DAD1 B, Sig=210,4 Ref=360,100

| Peak # | RetTime [min] | Type | Width [min] | Area [mAU*s] | Height [mAU] | Area %  |
|--------|---------------|------|-------------|--------------|--------------|---------|
| 1      | 21.175        | BB   | 0.5245      | 8123.31201   | 236.61098    | 44.1318 |
| 2      | 29.116        | BB   | 0.7275      | 8100.80811   | 168.33057    | 44.0095 |
| 3      | 32.659        | BB   | 0.6834      | 2182.81909   | 42.62933     | 11.8587 |

Totals : 1.84069e4 447.57087



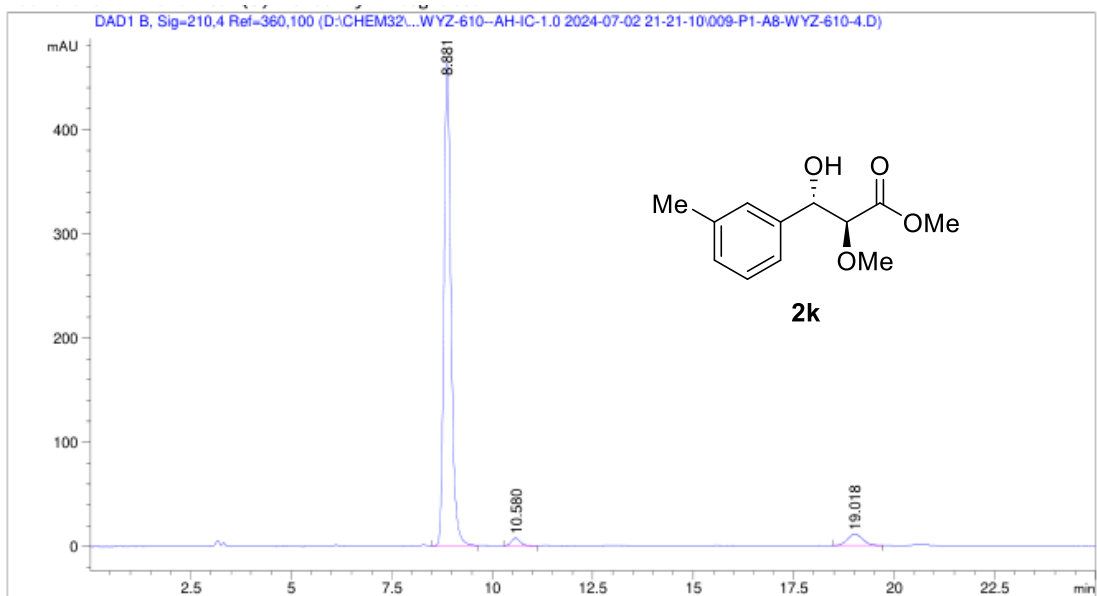

Signal 1: DAD1 B, Sig=210,4 Ref=360,100

| Peak # | RetTime [min] | Type | Width [min] | Area [mAU*s] | Height [mAU] | Area %  |
|--------|---------------|------|-------------|--------------|--------------|---------|
| 1      | 8.881         | BB   | 0.1866      | 5666.74756   | 463.49976    | 93.3299 |
| 2      | 10.580        | BB   | 0.2327      | 115.52114    | 7.37732      | 1.9026  |
| 3      | 19.018        | BB   | 0.3292      | 289.46915    | 10.92203     | 4.7675  |

Totals : 6071.73785 481.79911

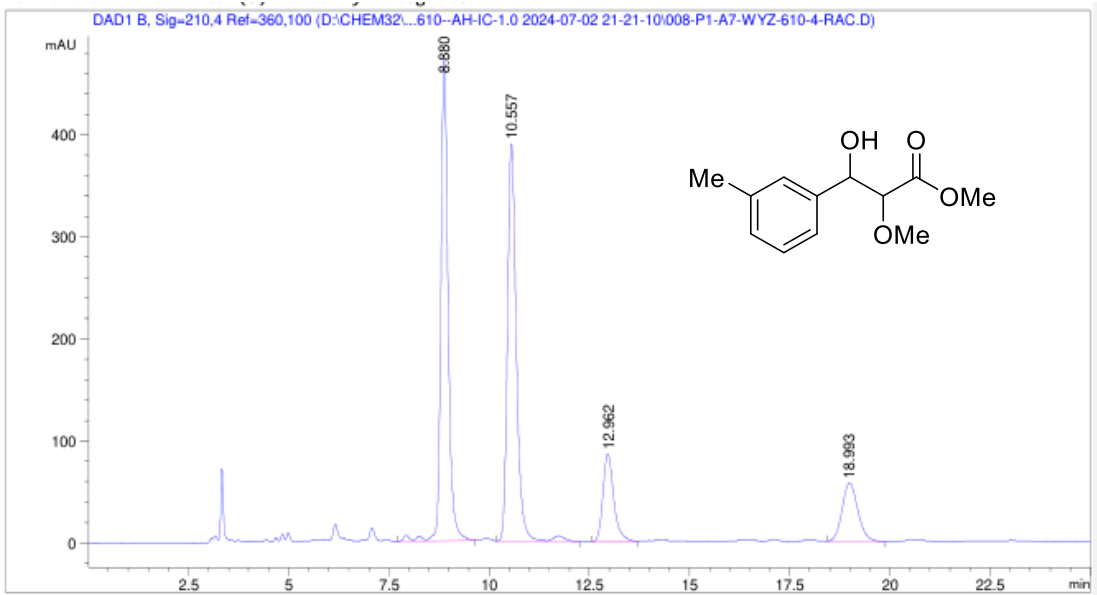

Signal 1: DAD1 B, Sig=210,4 Ref=360,100

| Peak # | RetTime [min] | Type | Width [min] | Area [mAU*s] | Height [mAU] | Area %  |
|--------|---------------|------|-------------|--------------|--------------|---------|
| 1      | 8.880         | VB R | 0.1899      | 6002.58887   | 471.12833    | 39.5051 |
| 2      | 10.557        | BV R | 0.2332      | 6020.23535   | 389.74423    | 39.6212 |
| 3      | 12.962        | BB   | 0.2899      | 1607.50122   | 86.06207     | 10.5795 |
| 4      | 18.993        | BB   | 0.4170      | 1564.14722   | 57.19684     | 10.2942 |

Totals : 1.51945e4 1004.13146

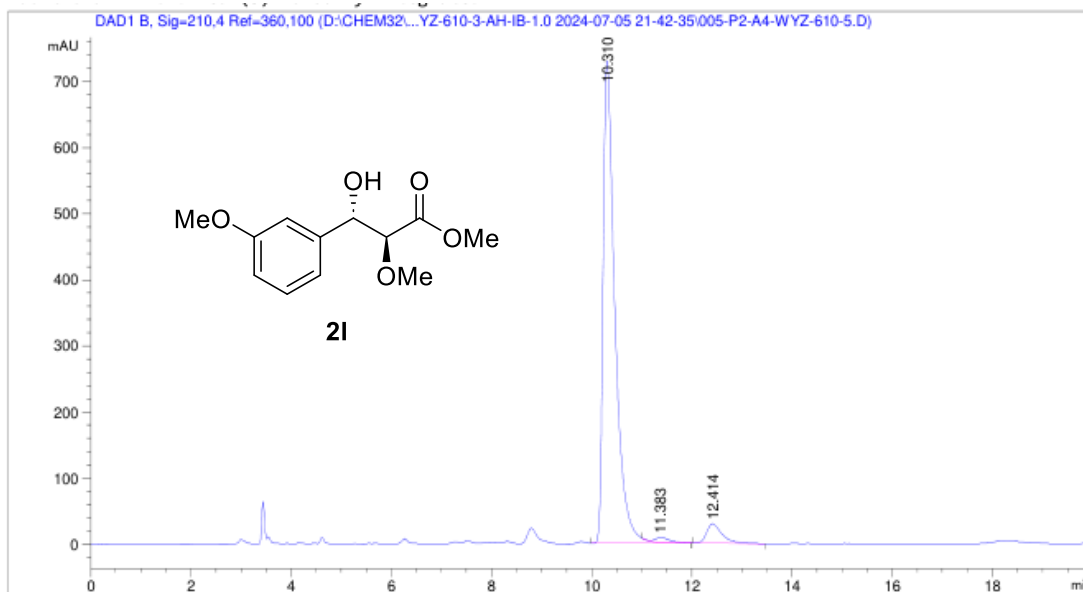

Signal 1: DAD1 B, Sig=210,4 Ref=360,100

| Peak #   | RetTime [min] | Type | Width [min] | Area [mAU*s] | Height [mAU] | Area %  |
|----------|---------------|------|-------------|--------------|--------------|---------|
| 1        | 10.310        | BV R | 0.2398      | 1.18753e4    | 729.98511    | 93.8196 |
| 2        | 11.383        | VB E | 0.2905      | 159.22072    | 7.72479      | 1.2579  |
| 3        | 12.414        | BB   | 0.3161      | 623.06519    | 29.30134     | 4.9225  |
| Totals : |               |      |             | 1.26576e4    | 767.01124    |         |

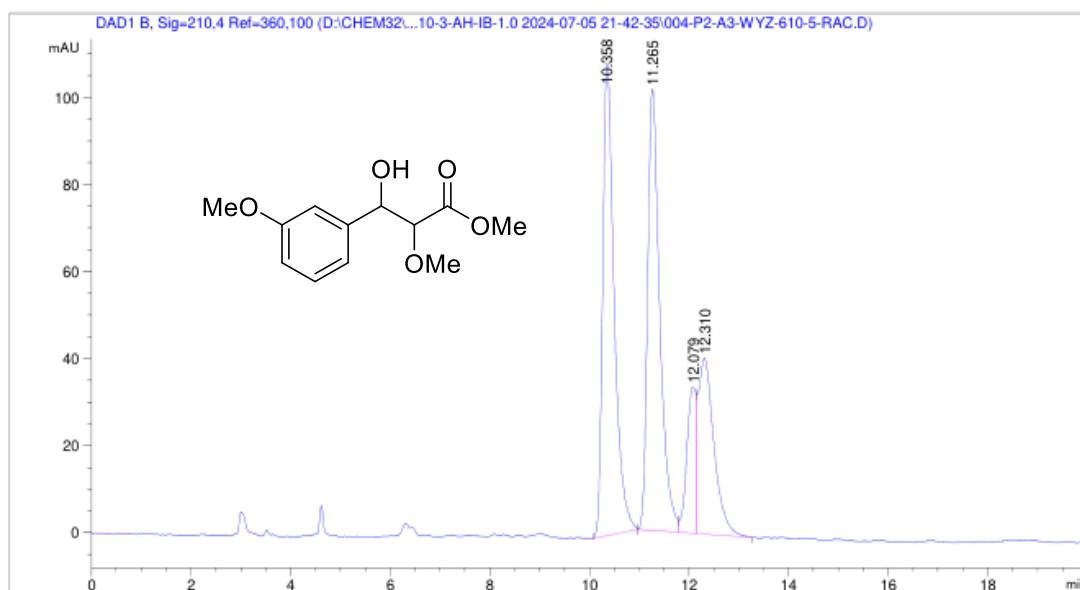

Signal 1: DAD1 B, Sig=210,4 Ref=360,100

| Peak #   | RetTime [min] | Type | Width [min] | Area [mAU*s] | Height [mAU] | Area %  |
|----------|---------------|------|-------------|--------------|--------------|---------|
| 1        | 10.358        | BB   | 0.2370      | 1721.51697   | 108.56081    | 36.2032 |
| 2        | 11.265        | BV   | 0.2534      | 1714.04370   | 101.32056    | 36.0460 |
| 3        | 12.079        | VV   | 0.1984      | 438.87424    | 33.59826     | 9.2294  |
| 4        | 12.310        | VB   | 0.3142      | 880.71875    | 40.41536     | 18.5214 |
| Totals : |               |      |             | 4755.15366   | 283.89499    |         |

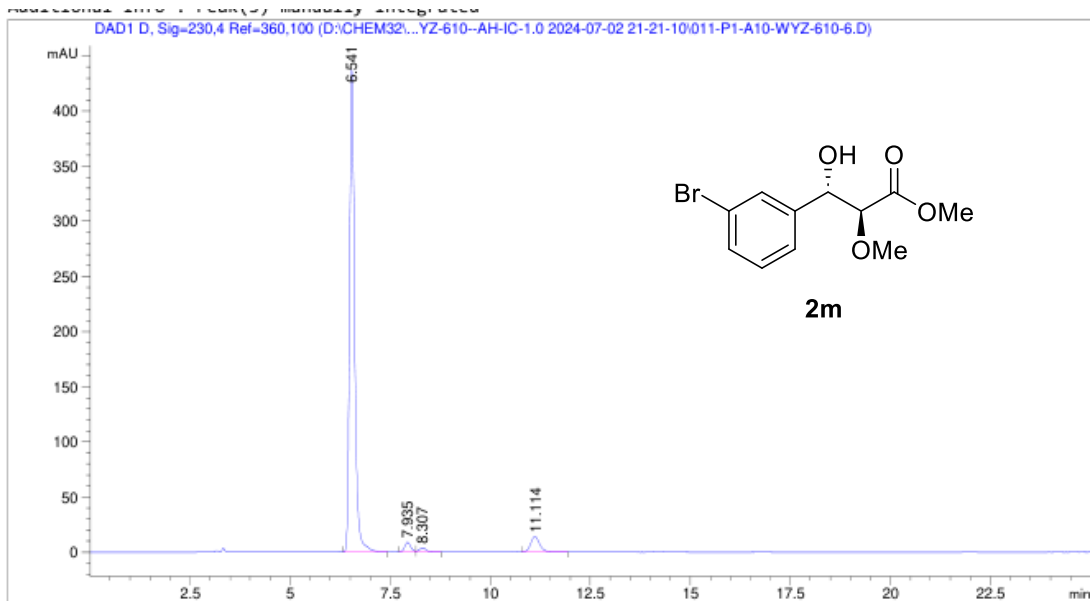

Signal 1: DAD1 D, Sig=230,4 Ref=360,100

| Peak # | RetTime [min] | Type | Width [min] | Area [mAU*s] | Height [mAU] | Area %  |
|--------|---------------|------|-------------|--------------|--------------|---------|
| 1      | 6.541         | BB   | 0.1320      | 3824.29590   | 437.23657    | 91.6606 |
| 2      | 7.935         | BV   | 0.1622      | 89.11009     | 8.50681      | 2.1358  |
| 3      | 8.307         | VB   | 0.1754      | 43.32380     | 3.79023      | 1.0384  |
| 4      | 11.114        | BB   | 0.2395      | 215.50446    | 13.85028     | 5.1652  |

Totals : 4172.23425 463.38389

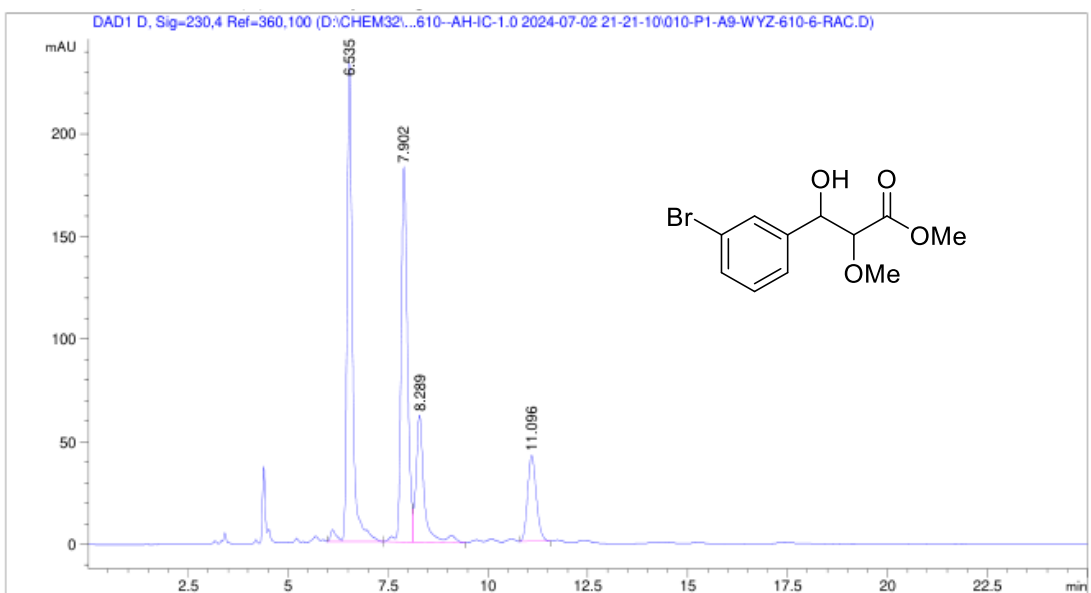

Signal 1: DAD1 D, Sig=230,4 Ref=360,100

| Peak # | RetTime [min] | Type | Width [min] | Area [mAU*s] | Height [mAU] | Area %  |
|--------|---------------|------|-------------|--------------|--------------|---------|
| 1      | 6.535         | VB R | 0.1386      | 2229.97168   | 233.26588    | 38.6872 |
| 2      | 7.902         | VV R | 0.1700      | 2025.17786   | 182.51039    | 35.1343 |
| 3      | 8.289         | VV R | 0.1963      | 866.29425    | 61.77230     | 15.0291 |
| 4      | 11.096        | VB   | 0.2367      | 642.65875    | 41.95615     | 11.1493 |

Totals : 5764.10254 519.50473

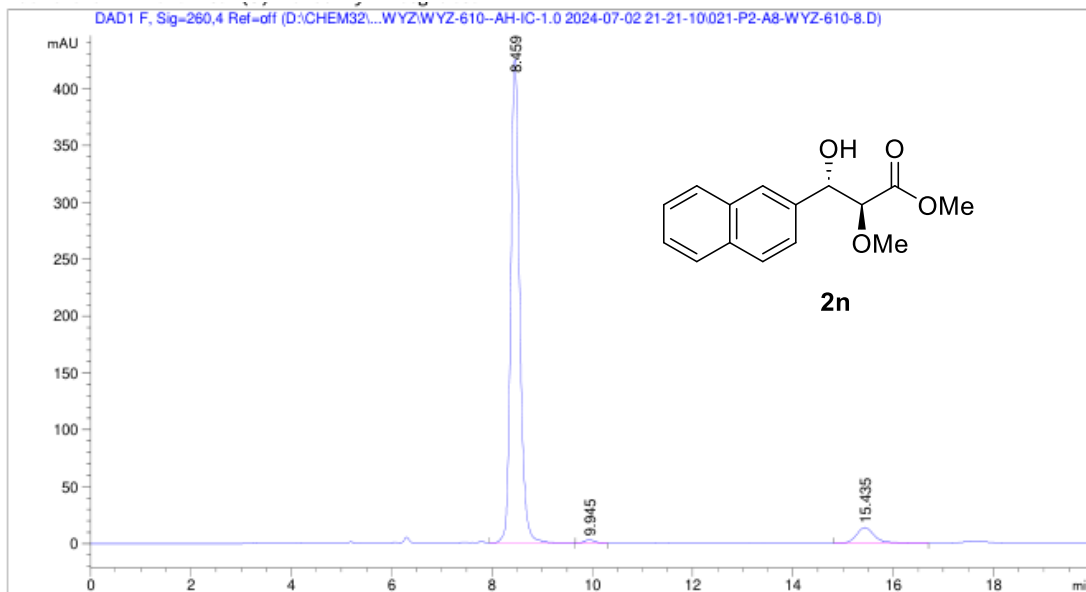

Signal 1: DAD1 F, Sig=260,4 Ref=off

| Peak # | RetTime [min] | Type | Width [min] | Area [mAU*s] | Height [mAU] | Area %  |
|--------|---------------|------|-------------|--------------|--------------|---------|
| 1      | 8.459         | BB   | 0.1885      | 5265.93359   | 425.24387    | 92.9839 |
| 2      | 9.945         | BB   | 0.2224      | 41.22725     | 2.89021      | 0.7280  |
| 3      | 15.435        | BB   | 0.3836      | 356.11420    | 13.95924     | 6.2881  |

Totals : 5663.27504 442.09332

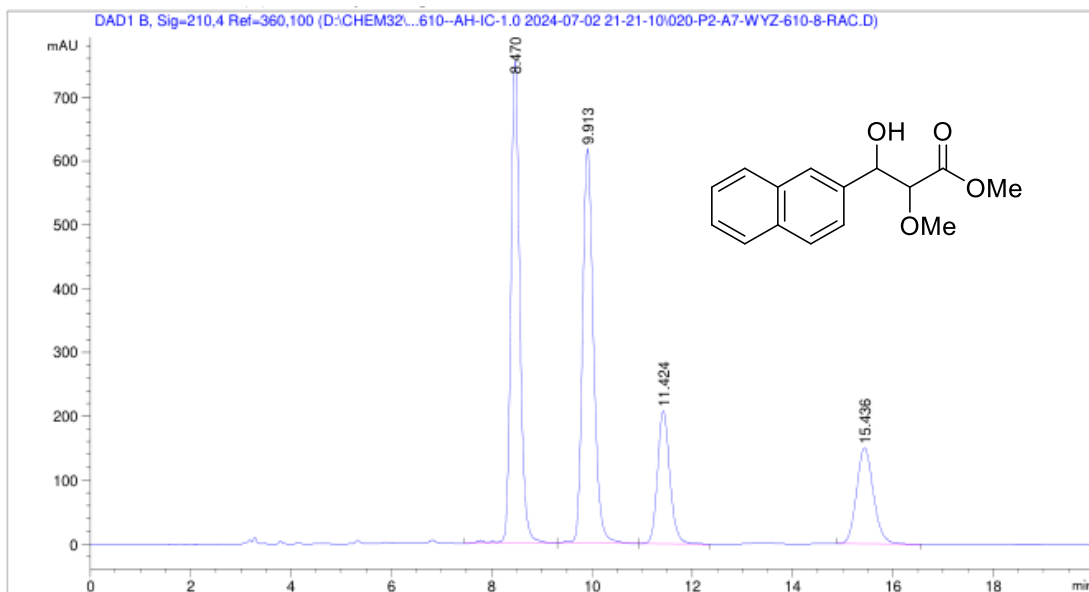

Signal 1: DAD1 B, Sig=210,4 Ref=360,100

| Peak # | RetTime [min] | Type | Width [min] | Area [mAU*s] | Height [mAU] | Area %  |
|--------|---------------|------|-------------|--------------|--------------|---------|
| 1      | 8.470         | VB R | 0.1902      | 9431.28223   | 755.77661    | 36.4263 |
| 2      | 9.913         | VB R | 0.2325      | 9375.48145   | 618.08258    | 36.2107 |
| 3      | 11.424        | BB   | 0.2615      | 3559.81396   | 208.20245    | 13.7490 |
| 4      | 15.436        | BB   | 0.3613      | 3524.85669   | 150.47789    | 13.6140 |

Totals : 2.58914e4 1732.53954

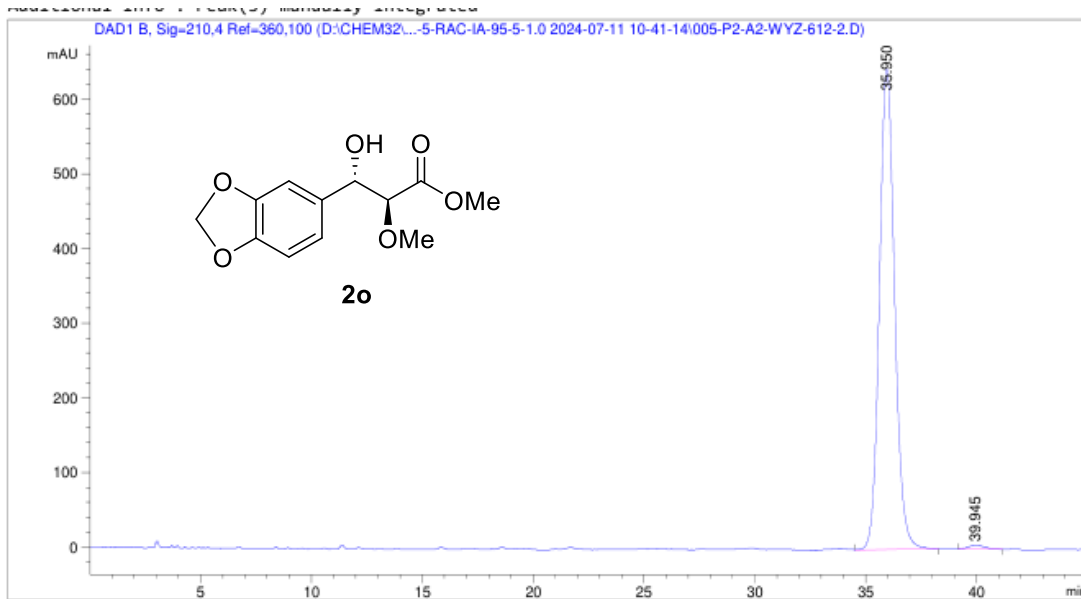

Signal 1: DAD1 B, Sig=210,4 Ref=360,100

| Peak # | RetTime [min] | Type | Width [min] | Area [mAU*s] | Height [mAU] | Area %  |
|--------|---------------|------|-------------|--------------|--------------|---------|
| 1      | 35.950        | BB   | 0.7297      | 3.06216e4    | 642.94012    | 99.1065 |
| 2      | 39.945        | BB   | 0.6250      | 276.08640    | 5.27128      | 0.8935  |

Totals : 3.08977e4 648.21140

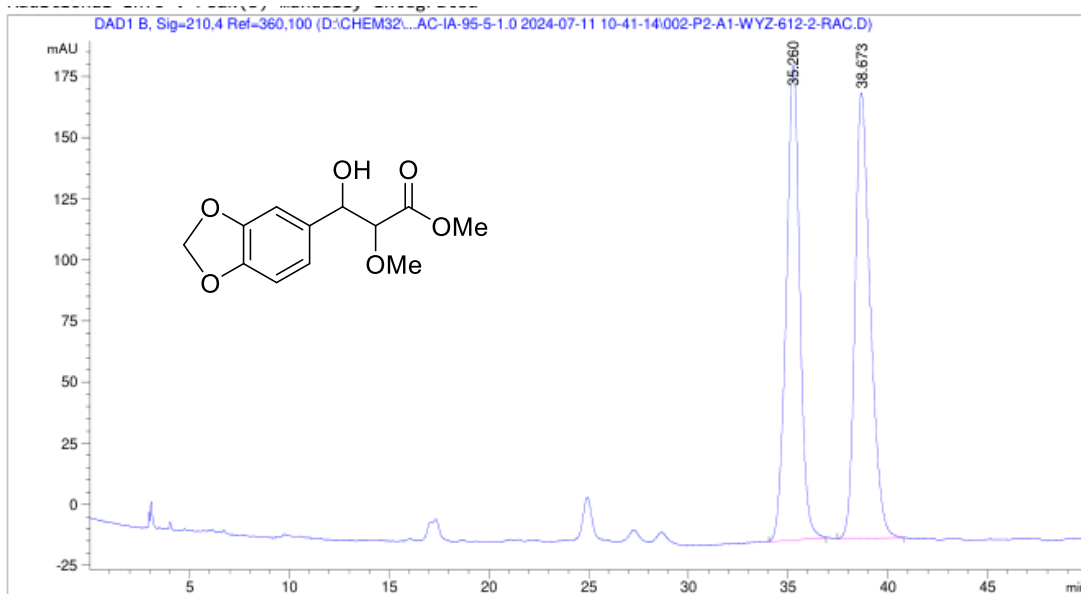

Signal 1: DAD1 B, Sig=210,4 Ref=360,100

| Peak # | RetTime [min] | Type | Width [min] | Area [mAU*s] | Height [mAU] | Area %  |
|--------|---------------|------|-------------|--------------|--------------|---------|
| 1      | 35.260        | BB   | 0.6828      | 9140.53418   | 194.32420    | 48.5405 |
| 2      | 38.673        | BB   | 0.7762      | 9690.20605   | 182.27994    | 51.4595 |

Totals : 1.88307e4 376.60414

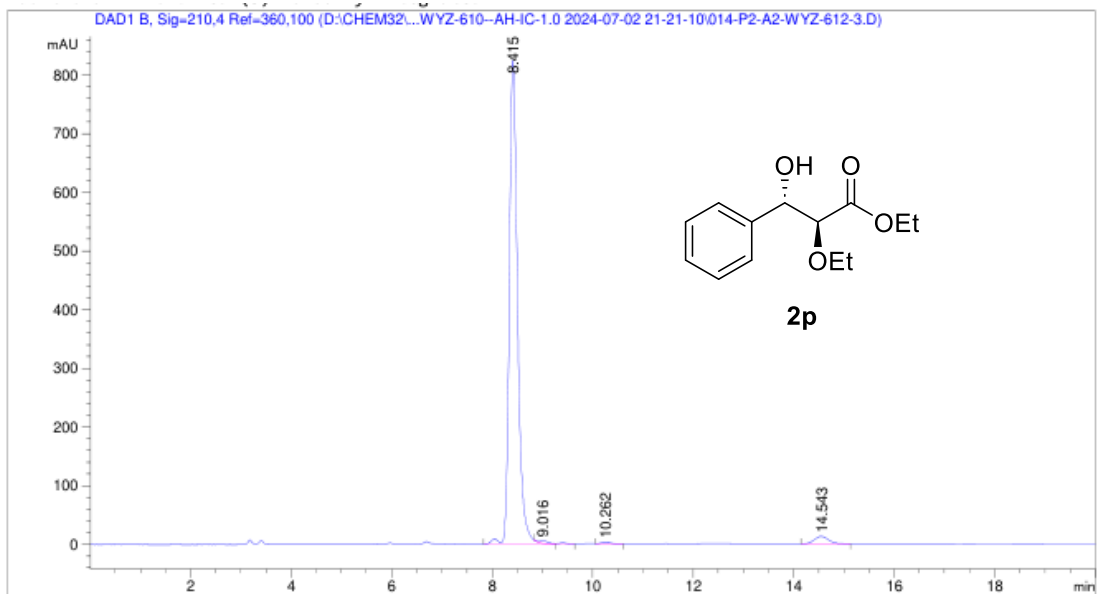

Signal 1: DAD1 B, Sig=210,4 Ref=360,100

| Peak # | RetTime [min] | Type | Width [min] | Area [mAU*s] | Height [mAU] | Area %  |
|--------|---------------|------|-------------|--------------|--------------|---------|
| 1      | 8.415         | VV R | 0.1751      | 9513.89941   | 824.71613    | 96.5541 |
| 2      | 9.016         | VV E | 0.1782      | 53.07420     | 4.17760      | 0.5386  |
| 3      | 10.262        | BB   | 0.1819      | 37.23717     | 3.24401      | 0.3779  |
| 4      | 14.543        | BB   | 0.3021      | 249.22514    | 12.74842     | 2.5293  |

Totals : 9853.43592 844.88616

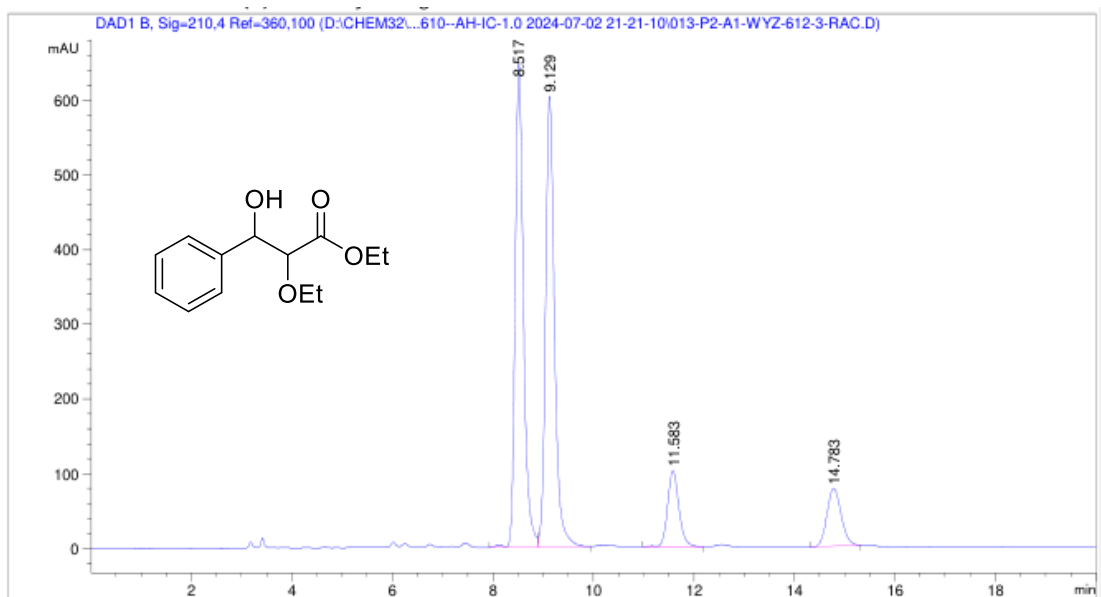

Signal 1: DAD1 B, Sig=210,4 Ref=360,100

| Peak # | RetTime [min] | Type | Width [min] | Area [mAU*s] | Height [mAU] | Area %  |
|--------|---------------|------|-------------|--------------|--------------|---------|
| 1      | 8.517         | VV R | 0.1743      | 7376.78271   | 647.78552    | 41.1009 |
| 2      | 9.129         | VB   | 0.1880      | 7455.40771   | 603.84821    | 41.5390 |
| 3      | 11.583        | VB R | 0.2398      | 1599.76001   | 101.93784    | 8.9133  |
| 4      | 14.783        | BB   | 0.3019      | 1516.01208   | 77.59644     | 8.4467  |

Totals : 1.79480e4 1431.16801

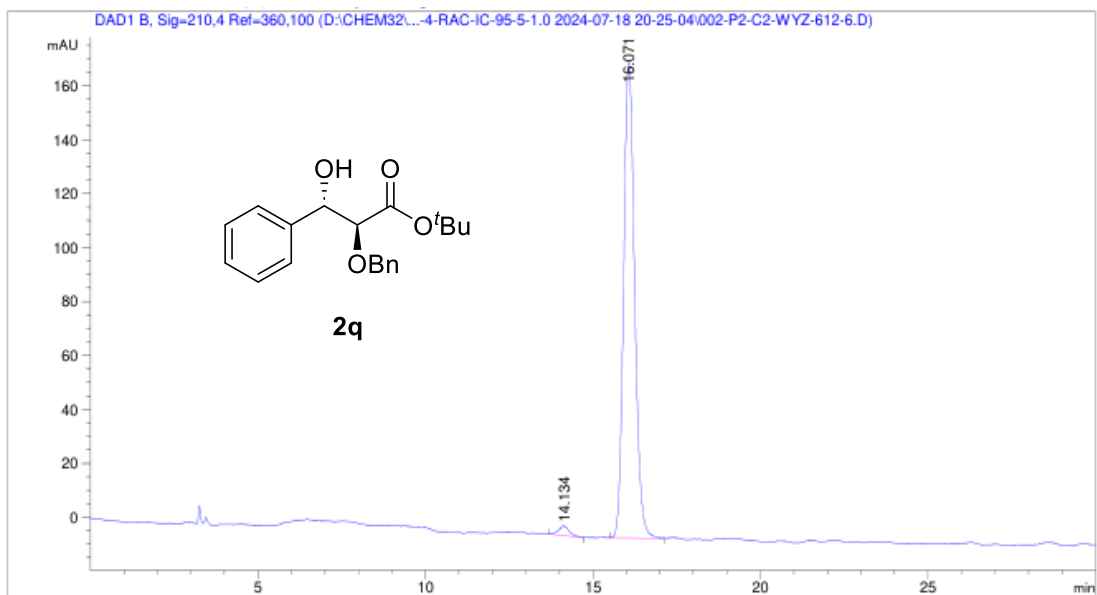

Signal 1: DAD1 B, Sig=210,4 Ref=360,100

| Peak # | RetTime [min] | Type | Width [min] | Area [mAU*s] | Height [mAU] | Area %  |
|--------|---------------|------|-------------|--------------|--------------|---------|
| 1      | 14.134        | BB   | 0.2713      | 77.11781     | 3.52350      | 1.8833  |
| 2      | 16.071        | BB   | 0.3512      | 4017.67896   | 176.71280    | 98.1167 |

Totals : 4094.79676 180.23629

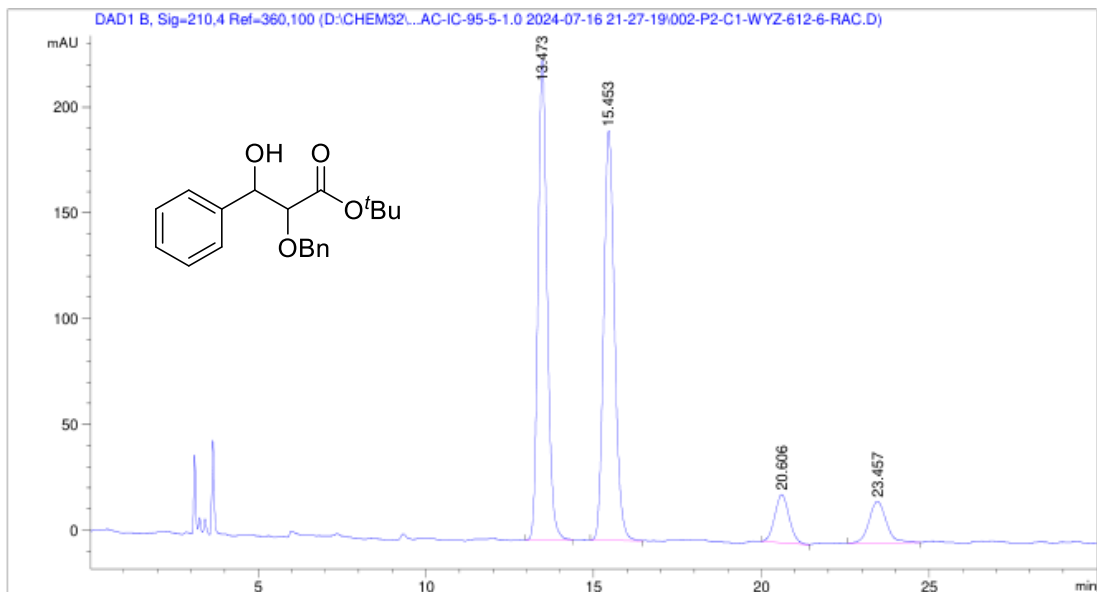

Signal 1: DAD1 B, Sig=210,4 Ref=360,100

| Peak # | RetTime [min] | Type | Width [min] | Area [mAU*s] | Height [mAU] | Area %  |
|--------|---------------|------|-------------|--------------|--------------|---------|
| 1      | 13.473        | BB   | 0.2915      | 4314.28857   | 227.26022    | 42.9113 |
| 2      | 15.453        | BB   | 0.3484      | 4361.80469   | 193.94235    | 43.3840 |
| 3      | 20.606        | BB   | 0.4378      | 675.46204    | 22.78617     | 6.7184  |
| 4      | 23.457        | BB   | 0.4815      | 702.40369    | 19.72126     | 6.9863  |

Totals : 1.00540e4 463.71001

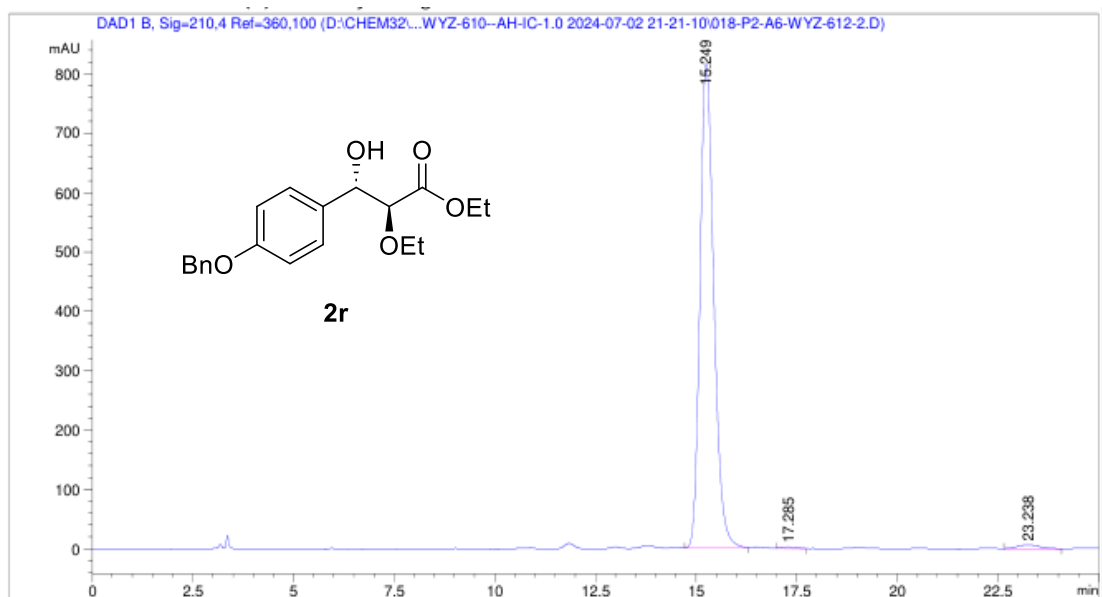

Signal 1: DAD1 B, Sig=210,4 Ref=360,100

| Peak #   | RetTime [min] | Type | Width [min] | Area [mAU*s] | Height [mAU] | Area %  |
|----------|---------------|------|-------------|--------------|--------------|---------|
| 1        | 15.249        | VB   | 0.3676      | 1.93983e4    | 815.23517    | 98.5667 |
| 2        | 17.285        | BB   | 0.2959      | 50.03681     | 2.08570      | 0.2542  |
| 3        | 23.238        | BB   | 0.4349      | 232.04288    | 6.37111      | 1.1791  |
| Totals : |               |      |             | 1.96803e4    | 823.69199    |         |

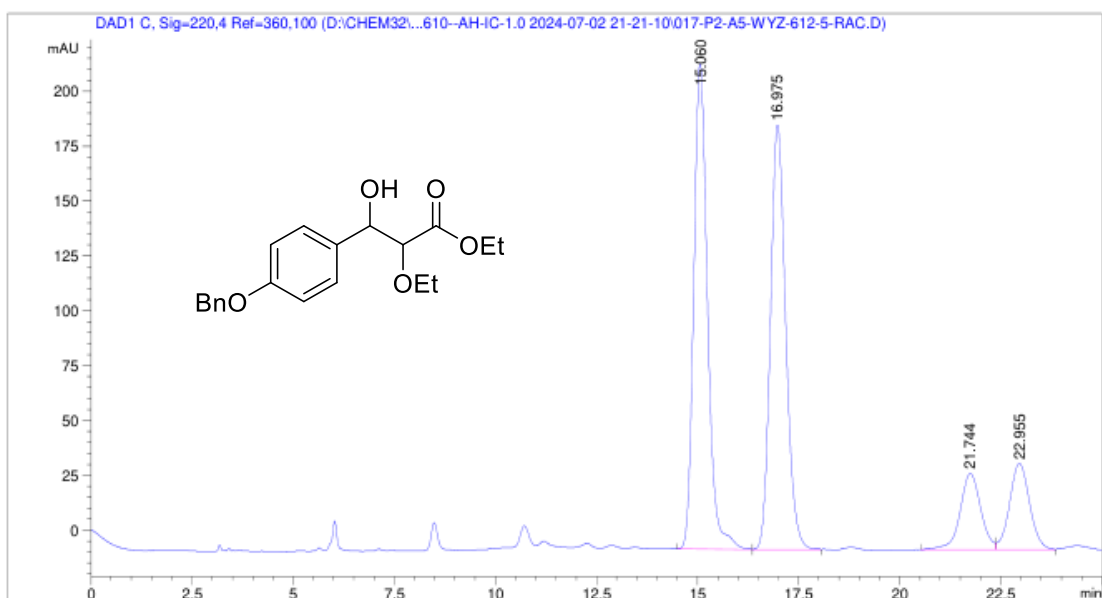

Signal 1: DAD1 C, Sig=220,4 Ref=360,100

| Peak #   | RetTime [min] | Type | Width [min] | Area [mAU*s] | Height [mAU] | Area %  |
|----------|---------------|------|-------------|--------------|--------------|---------|
| 1        | 15.060        | BB   | 0.3611      | 5216.35840   | 221.22687    | 40.5664 |
| 2        | 16.975        | BB   | 0.4020      | 5073.81934   | 193.43369    | 39.4580 |
| 3        | 21.744        | BV   | 0.5252      | 1223.09570   | 34.70211     | 9.5117  |
| 4        | 22.955        | VB   | 0.5087      | 1345.52673   | 39.17538     | 10.4639 |
| Totals : |               |      |             | 1.28588e4    | 488.53804    |         |



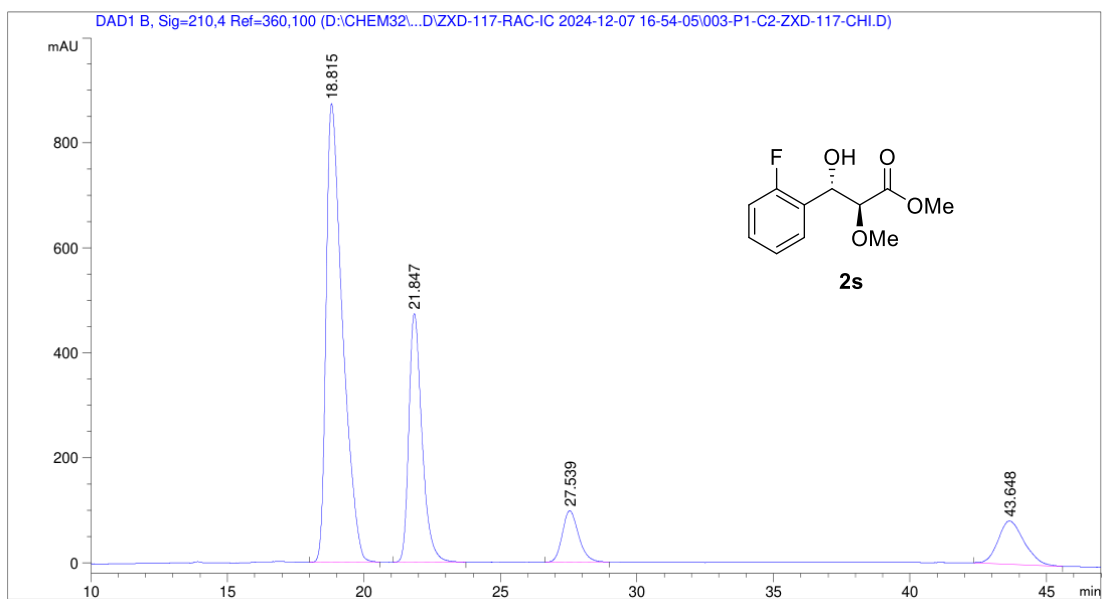

Signal 1: DAD1 B, Sig=210,4 Ref=360,100

| Peak # | RetTime [min] | Type | Width [min] | Area [mAU*s] | Height [mAU] | Area %  |
|--------|---------------|------|-------------|--------------|--------------|---------|
| 1      | 18.815        | BB   | 0.6154      | 3.66661e4    | 874.11792    | 59.0912 |
| 2      | 21.847        | BB   | 0.5089      | 1.58811e4    | 474.00757    | 25.5940 |
| 3      | 27.539        | BB   | 0.6183      | 4047.38672   | 97.89571     | 6.5228  |
| 4      | 43.648        | BB   | 0.8192      | 5455.47949   | 82.31331     | 8.7921  |

Totals : 6.20500e4 1528.33450

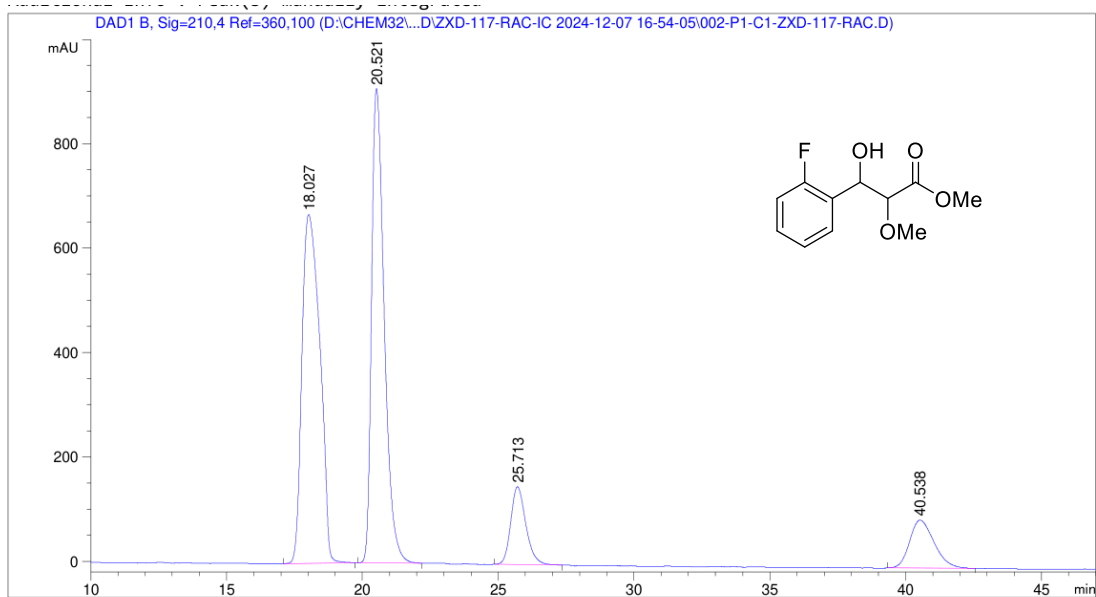

Signal 1: DAD1 B, Sig=210,4 Ref=360,100

| Peak # | RetTime [min] | Type | Width [min] | Area [mAU*s] | Height [mAU] | Area %  |
|--------|---------------|------|-------------|--------------|--------------|---------|
| 1      | 18.027        | BB   | 0.7247      | 3.06419e4    | 668.61499    | 42.8527 |
| 2      | 20.521        | BB   | 0.4984      | 2.93290e4    | 909.10474    | 41.0167 |
| 3      | 25.713        | BB   | 0.5852      | 5771.36865   | 149.21532    | 8.0713  |
| 4      | 40.538        | BB   | 0.8717      | 5762.84277   | 92.14124     | 8.0593  |

Totals : 7.15051e4 1819.07628

## 6. References

- [1] Miyata, R.; Shigeta, T.; Kumazawa, S.; Egi, M., Selective Syntheses of Coumarin and Benzofuran Derivatives Using Phenols and  $\alpha$ -Methoxy- $\beta$ -ketoesters. *SynOpen* **2023**, *07*, 8-16.
- [2] Monnereau, L.; Cartigny, D.; Scalone, M.; Ayad, T.; Ratovelomanana-Vidal, V., Efficient Synthesis of Differentiated syn-1,2-Diol Derivatives by Asymmetric Transfer Hydrogenation–Dynamic Kinetic Resolution of  $\alpha$ -Alkoxy-Substituted  $\beta$ -Ketoesters. *Chem. - Eur. J.* **2015**, *21*, 11799-11806.
- [3] Gangar, M.; Ittuveetil, A.; Goyal, S.; Pal, A.; Harikrishnan, M.; Nair, V. A., Anti selective glycolate aldol reactions of (S)-4-isopropyl-1-[(R)-1-phenylethyl]imidazolidin-2-one: application towards the asymmetric synthesis of 8-4'-oxyneolignans. *RSC Adv.* **2016**, *6*, 102116-102126.
